# Supplementary material for: Photocycloaddition reaction of atropisomeric maleimides: mechanism and selectivity
Source: Royal Society of Chemistry journal article supplement (doi:10.1039/c6cp04919b), 2016-01-01
Supplement: c6cp04919b1.pdf [file c6cp04919b1.pdf]

## **Supporting Information: Photocycloaddition Reaction of Atropisomeric Maleimides: Mechanism and Selectivity**

Xue-Ping Chang,<sup>a</sup> Yi-Ying Zheng,<sup>b</sup> Ganglong Cui,<sup>\*a</sup> Wei-Hai Fang<sup>a</sup> and Walter Thiel<sup>\*b</sup>

<sup>a</sup>Key Laboratory of Theoretical and Computational Photochemistry, Ministry of Education, Chemistry College, Beijing Normal University, Beijing 100875, China

<sup>b</sup>Max-Planck-Institut für Kohlenforschung, Kaiser-Wilhelm-Platz 1, 45470 Mülheim an der Ruhr, Germany

E-mails: [ganglong.cui@bnu.edu.cn](mailto:ganglong.cui@bnu.edu.cn); [thiel@kofo.mpg.de](mailto:thiel@kofo.mpg.de)

### **Contents**

**Table S1:** Selected dihedral angles and drawings of species A-D and A'-D'

**Figure S1:** SOMOs of reactant and product of the A conformer

**Figure S2:** Geometric structures of the DR5-DR8 paths

**Figure S3:** SOMOs along the DR1 reaction path

**Figure S4:** T<sub>1</sub>/S<sub>0</sub> crossing points

**Figure S5:** Spin density of diradical intermediates (DR5-DR8)

**Tables S2-S5:** Different functionals computed single-point energies

**Figure S6:** Reaction paths starting from the reactant conformers C and D

**Figures S7-S8:** Geometric structures of stationary-point structures

**Figure S9:** Mulliken charges of the triplet reactant conformers C and D

**Figure S10:** Gibbs free energy profiles at the B3LYP-D3/6-

31G\*/PCM level

**Figure S11:** Spin density plots of the substituted maleimides

**Figures S12-S15:** Energy profiles for different paths (DR1-DR8)

**Tables S6-S9:**  $\Delta\Delta E^\ddagger$  and  $\Delta\Delta E^{rx}$  for different paths (DR1-DR8)

**Table S10:** Gibbs free energy barriers at the B3LYP-D3/6-

31+G\*/PCM level

**Figure S16:** Gibbs free energy profiles at the B3LYP-D3/6-

31+G\*/PCM level

Cartesian coordinates of all optimized structures

**Table S1:** Selected Dihedral Angles (in Degrees) and Drawings of Four Different Conformers (A-D) and Their Enantiomers (A'-D') Optimized at the B3LYP-D3/6-31G\*/PCM (acetonitrile) Level

| Dihedral Angles | A-S0-R | B-S0-R | C-S0-R | D-S0-R |
|-----------------|--------|--------|--------|--------|
| C5-N-C6-C9      | 110.4  | 113.5  | 111.6  | 113.7  |
| C1-C2-C7-C8     | 111.1  | -117.7 | 111.4  | -117.4 |
| C2-C7-C8-C9     | 62.5   | 67.0   | 63.0   | 66.2   |
| C7-C8-C9-C10    | 83.9   | 80.3   | 83.5   | 79.6   |
| C8-C9-C10-C11   | -178.5 | -178.1 | -178.2 | -178.2 |

| Dihedral Angles | A'-S0-R | B'-S0-R | C'-S0-R | D'-S0-R |
|-----------------|---------|---------|---------|---------|
| C5-N-C6-C9      | -110.4  | -113.5  | -111.6  | -113.7  |
| C1-C2-C7-C8     | -111.1  | 117.7   | -111.4  | 117.4   |
| C2-C7-C8-C9     | -62.5   | -67.0   | -63.0   | -66.2   |
| C7-C8-C9-C10    | -83.9   | -80.3   | -83.5   | -79.6   |
| C8-C9-C10-C11   | 178.5   | 178.1   | 178.2   | 178.2   |

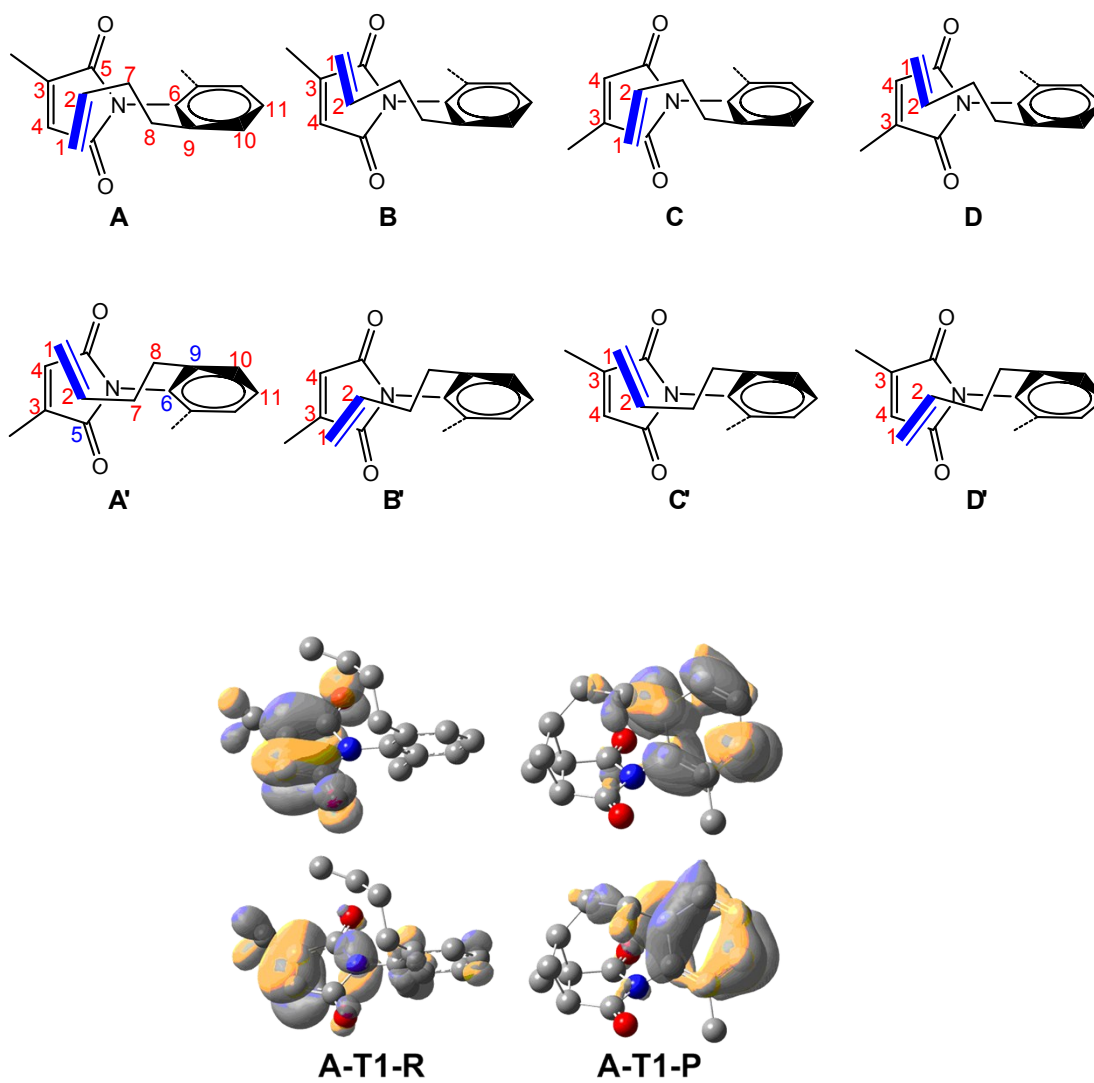

**Fig. S1:** Two singly-occupied molecular orbitals of the  $T_1$  reactant and product of the A conformer.

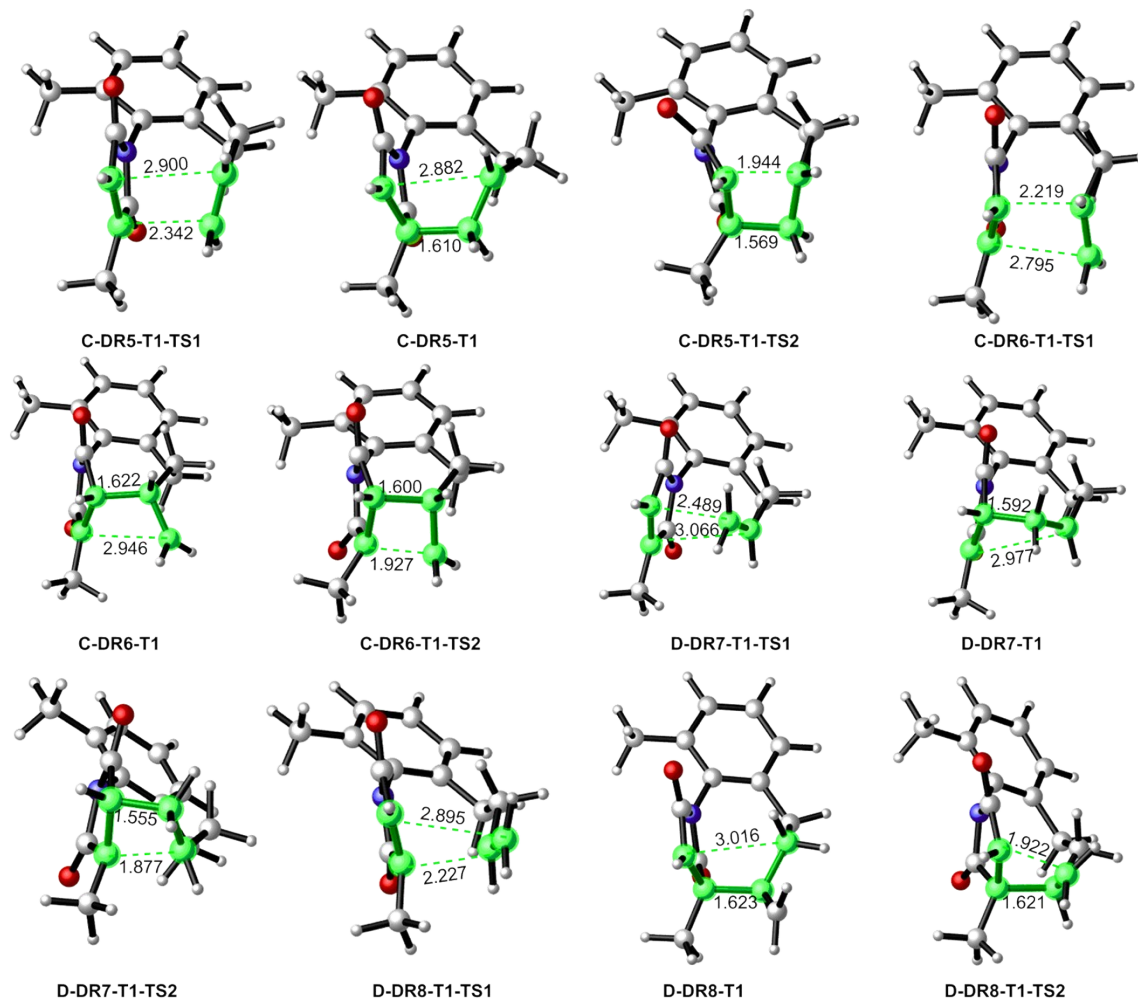

**Fig. S2:** B3LYP-D3/6-31G\*/PCM (acetonitrile) optimized stationary points (diradical intermediates and transition states) involved in the triplet-state reaction starting from the conformers C and D. Selected distances are given in Å.

**Comment on Fig. S3:** According to our calculations, the second half reaction will not take place in any of the  $T_1$  pathways DR1-DR8, because the Gibbs free energy of each transition state is more than 40 kcal/mol higher than that of the corresponding reactant (see main text and Fig. S10). Why is each second half reaction blocked in the  $T_1$  state? This can be traced back to the evolution of two relevant SOMOs along the  $T_1$  paths, e.g. of conformer A (Fig. S3). The two unpaired electrons are initially localized within the maleimide group of the triplet reactant (A-T1-R), become distributed over the maleimide and alkene groups in the intermediate (A-DR1-T1), and finally move to the phenyl moiety of the product (A-T1-P), forming a triplet exciton. Overall, the conversion from A-T1-R to A-T1-P may thus be viewed as a triplet exciton transfer from the maleimide to the phenyl group, which is energetically unfavorable.

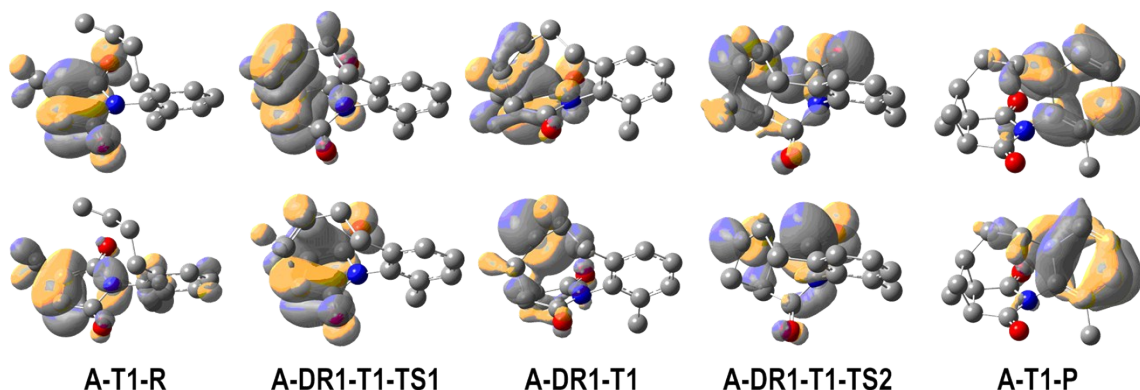

**Fig. S3:** Singly-occupied molecular orbitals along the  $T_1$  photocyclization reaction path DR1 of the A conformer. See main text for discussion.

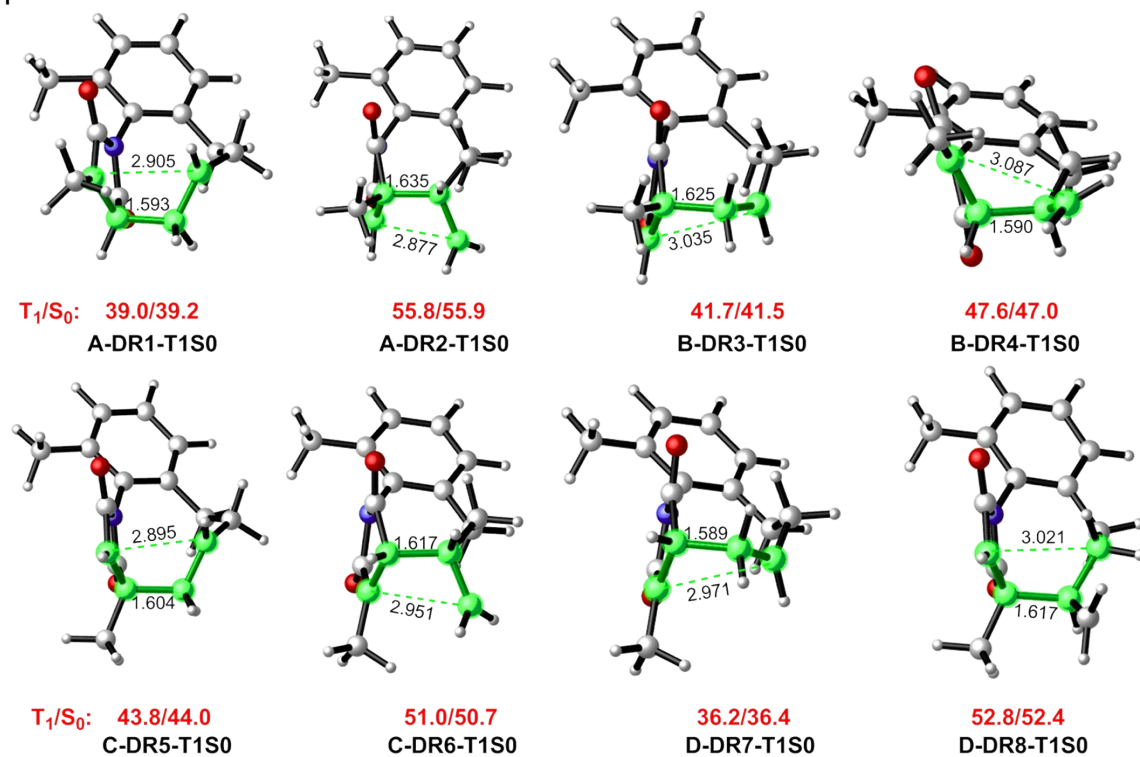

**Fig. S4:**  $T_1/S_0$  crossing points optimized at the B3LYP-D3/6-31G\*/PCM level.  $T_1/S_0$  state energies in kcal/mol, selected distances in Å. See main text for discussion.

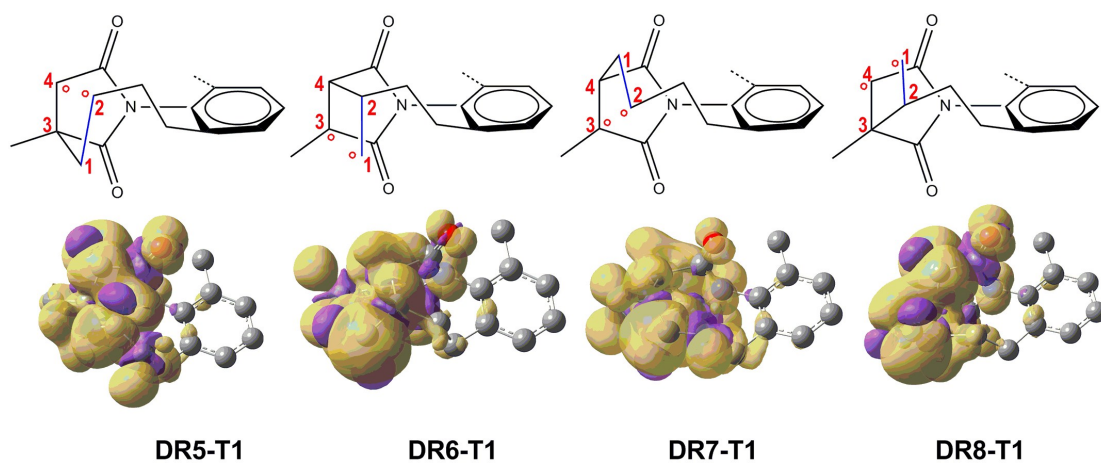

**Fig. S5:** Spin density plots for triplet diradical intermediates (paths DR5-DR8) obtained from B3LYP-D3/6-31G\*/PCM (acetonitrile) calculations.

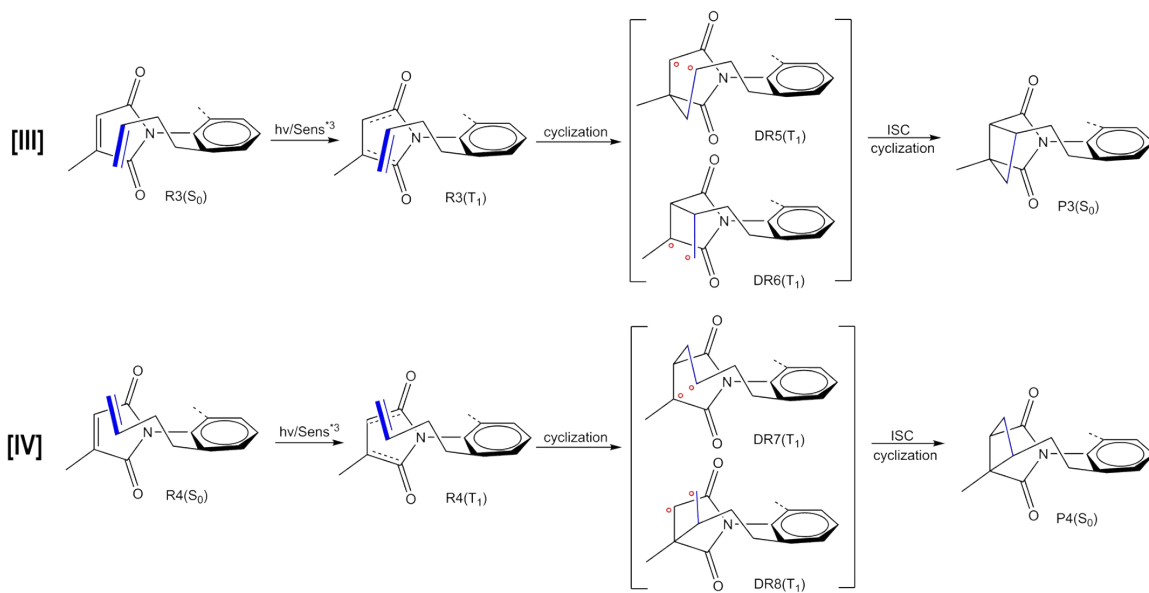

**Fig. S6:** Reaction paths for [2+2] photocyclization starting from the reactant conformers C and D.

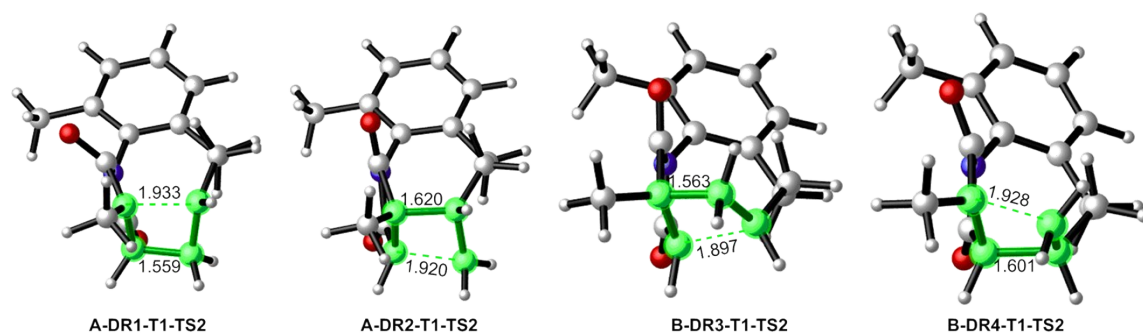

**Fig. S7:** B3LYP-D3/6-31G\*/PCM (acetonitrile) optimized transition states involved in the triplet-state the second half reaction starting from the conformers A and B. Selected distances are given in Å.

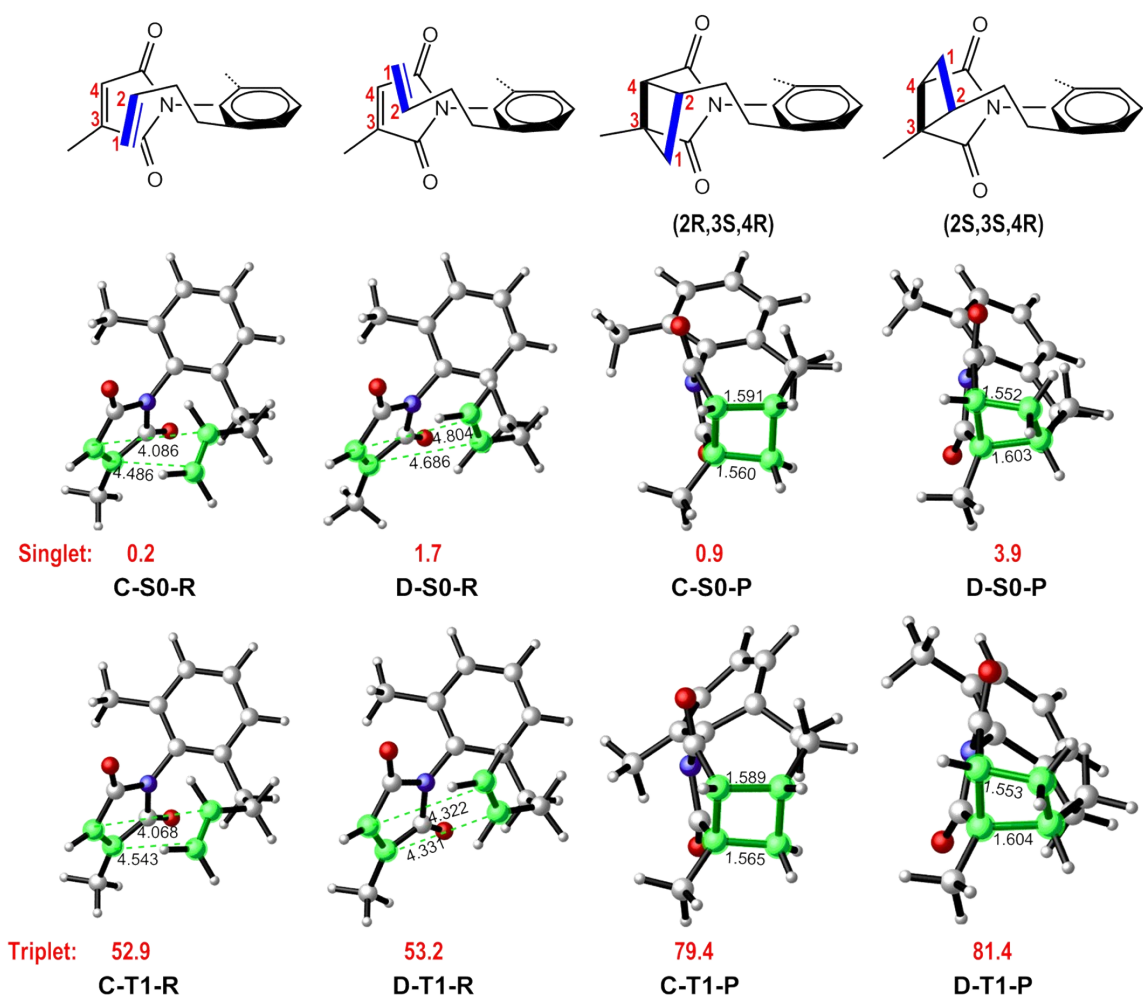

**Fig. S8:** B3LYP-D3/6-31G\*/PCM (acetonitrile) optimized stationary points (reactants and products) starting from the conformers C and D. Selected distances are given in Å.

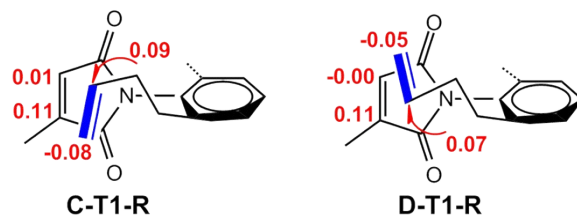

**Fig. S9:** Mulliken charges of the four carbon atoms involved in the [2+2] photoaddition reaction of the different triplet reactants starting from the conformers C and D.

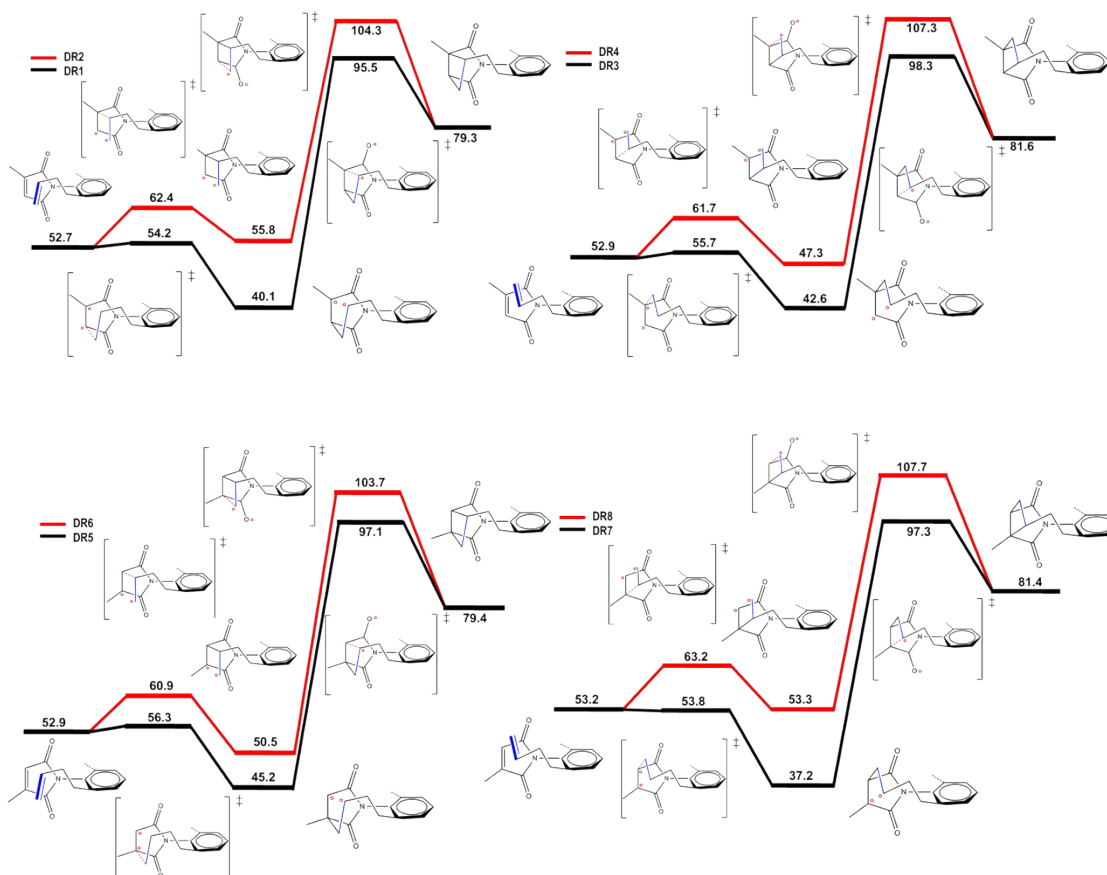

**Fig. S10:** Gibbs free energy profiles (in kcal/mol) for the [2+2] photocyclizations starting from the the reactant conformers A, B, C, and D computed at the B3LYP-D3/6-31G\*/PCM level.



**Comments on Fig. S11:** As discussed in the main paper, phenyl substitution at the maleimide double bond makes the DR1 pathway much more favorable thermodynamically. This can be understood by considering the electronic structures of the triplet diradical intermediates (e.g. A-DR1-T1 and B-DR3-T1). Fig. S11 shows the computed spin density distributions in these intermediates for compounds 1, 2, 7, and 10. In the case of methyl substitution (compounds 1 and 2) the plots for DR1 and DR3 look fairly similar, whereas there are pronounced differences in the case of phenyl substitution (compounds 7 and 10). On pathway DR1, the phenyl substituent is located at the radical center of the original maleimide double bond so that the spin density can delocalize into the phenyl ring, which affords significant stabilization (Fig. S11). On pathway DR3, such delocalization and stabilization is not possible because the phenyl substituent is attached to a saturated carbon atom. In these compounds, the diastereoselectivity is thus ultimately governed by the ability of the substituents to stabilize the intermediate diradical triplet species.

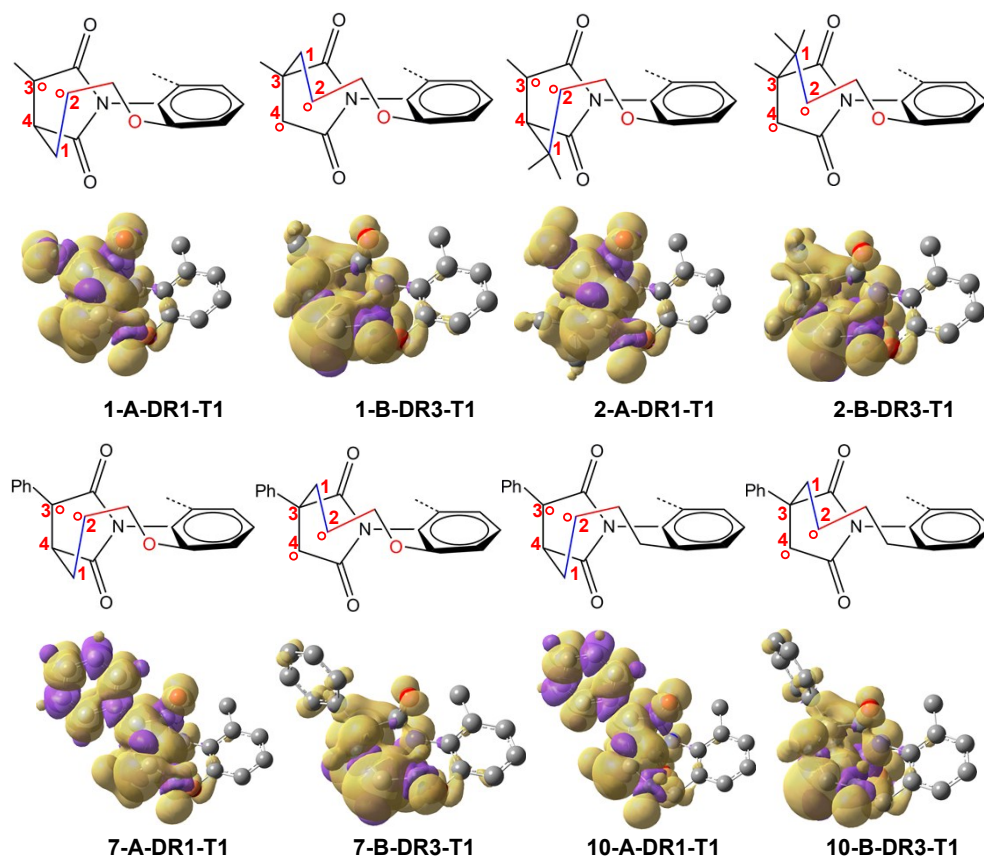

**Fig. S11:** Spin density plots of the diradical triplet intermediates on the DR1 and DR3 pathways of the substituted maleimides. Methyl-phenyl substitution on the

maleimide double bond stabilizes the DR1 diradical intermediates of compounds 7 and 10 (7-A-DR1-T1 and 10-A-DR1-T1) and makes no difference for the DR3 diradical intermediates (7-B-DR3-T1 and 10-B-DR3-T1).

**Table S2:** Relative Energies E, Enthalpies H, and Gibbs Free Energies G (in kcal/mol) Computed at the CAM-B3LYP-D3/6-31G\*/PCM Level.

| DR1 | R-S0 | P-S0  | R-T1 | TS1  | DR   | TS2   | P-T1 | T <sub>1</sub> /S <sub>0</sub> |
|-----|------|-------|------|------|------|-------|------|--------------------------------|
| E   | 0.0  | -11.2 | 59.3 | 57.5 | 35.5 | 95.7  | 72.5 | 35.5/35.7                      |
| H   | 0.0  | -9.6  | 57.3 | 55.3 | 34.8 | 93.2  | 71.1 |                                |
| G   | 0.0  | -5.9  | 56.4 | 56.6 | 36.5 | 96.0  | 73.3 |                                |
| DR2 |      |       |      |      |      |       |      |                                |
| E   | 0.0  | -11.2 | 59.3 | 64.8 | 52.1 | 106.2 | 72.5 | 52.1/52.3                      |
| H   | 0.0  | -9.6  | 57.3 | 62.3 | 50.4 | 102.7 | 71.2 |                                |
| G   | 0.0  | -5.9  | 56.4 | 64.0 | 51.6 | 104.5 | 73.3 |                                |
| DR3 |      |       |      |      |      |       |      |                                |
| E   | 1.0  | -8.5  | 61.2 | 58.5 | 37.6 | 98.8  | 75.6 | 38.2/38.1                      |
| H   | 1.0  | -6.9  | 58.9 | 56.2 | 36.6 | 95.9  | 73.7 |                                |
| G   | 0.9  | -2.8  | 58.0 | 57.7 | 38.5 | 99.4  | 75.7 |                                |
| DR4 |      |       |      |      |      |       |      |                                |
| E   | 1.0  | -8.5  | 61.2 | 64.7 | 43.6 | 108.4 | 75.6 | 43.6/43.2                      |
| H   | 1.0  | -6.9  | 58.9 | 62.3 | 42.2 | 105.3 | 73.7 |                                |
| G   | 0.9  | -2.8  | 58.0 | 63.9 | 43.3 | 107.4 | 75.7 |                                |
| DR5 |      |       |      |      |      |       |      |                                |
| E   | 0.3  | -11.0 | 58.5 | 59.0 | 40.2 | 97.7  | 72.7 | 40.2/40.4                      |
| H   | 0.2  | -9.4  | 56.6 | 56.8 | 39.2 | 95.2  | 71.4 |                                |
| G   | 0.2  | -5.7  | 55.7 | 58.4 | 41.2 | 97.9  | 73.5 |                                |
| DR6 |      |       |      |      |      |       |      |                                |
| E   | 0.3  | -11.0 | 58.5 | 64.0 | 47.5 | 105.4 | 72.7 | 47.5/47.3                      |
| H   | 0.2  | -9.4  | 56.6 | 61.7 | 46.1 | 102.3 | 71.4 |                                |
| G   | 0.2  | -5.7  | 55.7 | 63.1 | 46.8 | 104.2 | 73.5 |                                |
| DR7 |      |       |      |      |      |       |      |                                |
| E   | 1.1  | -8.8  | 61.3 | 57.0 | 32.6 | 97.4  | 75.4 | 32.6/32.8                      |
| H   | 1.1  | -7.2  | 58.9 | 54.8 | 31.9 | 95.1  | 73.5 |                                |
| G   | 1.0  | -3.1  | 57.7 | 56.0 | 33.2 | 97.2  | 75.4 |                                |
| DR8 |      |       |      |      |      |       |      |                                |
| E   | 1.1  | -8.8  | 61.3 | 65.8 | 48.9 | 110.5 | 75.4 | 48.9/48.6                      |
| H   | 1.1  | -7.2  | 58.9 | 63.1 | 47.3 | 111.0 | 73.5 |                                |
| G   | 1.0  | -3.1  | 57.7 | 65.0 | 48.9 | 114.6 | 75.4 |                                |

**Table S3:** Relative Energies E, Enthalpies H, and Gibbs Free Energies G (in kcal/mol) Computed at the M06-2X/6-31G\*/PCM Level.

| DR1 | R-S0 | P-S0  | R-T1 | TS1  | DR   | TS2   | P-T1 | T <sub>1</sub> /S <sub>0</sub> |
|-----|------|-------|------|------|------|-------|------|--------------------------------|
| E   | 0.0  | -12.6 | 60.2 | 60.4 | 38.1 | 98.3  | 75.5 | 38.1/38.3                      |
| H   | 0.0  | -11.1 | 58.1 | 58.2 | 37.5 | 95.7  | 74.4 |                                |
| G   | 0.0  | -7.1  | 59.5 | 59.6 | 39.2 | 98.9  | 76.9 |                                |
| DR2 |      |       |      |      |      |       |      |                                |
| E   | 0.0  | -12.6 | 60.2 | 67.4 | 53.6 | 108.6 | 75.5 | 53.6/53.8                      |
| H   | 0.0  | -11.1 | 58.1 | 64.9 | 52.0 | 104.2 | 74.4 |                                |
| G   | 0.0  | -7.1  | 59.5 | 66.7 | 53.8 | 107.3 | 76.9 |                                |
| DR3 |      |       |      |      |      |       |      |                                |
| E   | 0.9  | -10.3 | 64.7 | 61.5 | 39.6 | 100.8 | 79.8 | 40.3/40.3                      |
| H   | 0.8  | -8.7  | 62.6 | 59.1 | 38.6 | 97.7  | 77.9 |                                |
| G   | 0.6  | -4.4  | 61.5 | 60.5 | 40.6 | 101.4 | 80.1 |                                |
| DR4 |      |       |      |      |      |       |      |                                |
| E   | 0.9  | -10.3 | 64.7 | 67.6 | 45.5 | 110.5 | 79.8 | 45.5/45.3                      |
| H   | 0.8  | -8.7  | 62.6 | 65.1 | 44.0 | 106.7 | 77.9 |                                |
| G   | 0.6  | -4.4  | 61.5 | 66.8 | 45.2 | 110.3 | 80.1 |                                |
| DR5 |      |       |      |      |      |       |      |                                |
| E   | 0.3  | -12.2 | 62.1 | 61.8 | 42.3 | 100.5 | 75.8 | 42.3/42.5                      |
| H   | 0.2  | -10.7 | 60.4 | 59.5 | 41.2 | 97.8  | 74.7 |                                |
| G   | -0.1 | -6.7  | 59.4 | 61.4 | 43.4 | 100.9 | 77.2 |                                |
| DR6 |      |       |      |      |      |       |      |                                |
| E   | 0.3  | -12.2 | 62.1 | 66.9 | 49.3 | 108.0 | 75.8 | 49.3/49.3                      |
| H   | 0.2  | -10.7 | 60.4 | 64.6 | 48.1 | 104.7 | 74.7 |                                |
| G   | -0.1 | -6.7  | 59.4 | 66.3 | 49.3 | 106.5 | 77.2 |                                |
| DR7 |      |       |      |      |      |       |      |                                |
| E   | 1.0  | -10.8 | 64.8 | 60.1 | 35.2 | 99.5  | 79.3 | 35.2/35.4                      |
| H   | 0.7  | -9.3  | 61.9 | 58.0 | 34.5 | 97.1  | 77.5 |                                |
| G   | 0.0  | -4.8  | 62.4 | 59.5 | 35.6 | 99.4  | 79.7 |                                |
| DR8 |      |       |      |      |      |       |      |                                |
| E   | 1.0  | -10.8 | 64.8 | 68.2 | 50.0 | 110.8 | 79.3 | 50.0/49.9                      |
| H   | 0.7  | -9.3  | 61.9 | 65.6 | 48.4 | 106.6 | 77.5 |                                |
| G   | 0.0  | -4.8  | 62.4 | 67.5 | 50.3 | 110.4 | 79.7 |                                |

**Table S4:** Relative Energies E, Enthalpies H, and Gibbs Free Energies G (in kcal/mol) Computed at the PBE0-D3/6-31G\*/PCM Level.

| DR1 | R-S0 | P-S0  | R-T1 | TS1  | DR   | TS2  | P-T1 | T <sub>1</sub> /S <sub>0</sub> |
|-----|------|-------|------|------|------|------|------|--------------------------------|
| E   | 0.0  | -16.6 | 55.7 | 53.1 | 30.6 | 85.7 | 65.8 | 30.6/30.8                      |
| H   | 0.0  | -15.1 | 53.5 | 50.9 | 29.9 | 83.1 | 64.5 |                                |
| G   | 0.0  | -11.1 | 52.6 | 52.2 | 31.7 | 86.2 | 66.9 |                                |
| DR2 |      |       |      |      |      |      |      |                                |
| E   | 0.0  | -16.6 | 55.7 | 58.7 | 47.5 | 96.4 | 65.8 | 47.5/47.7                      |
| H   | 0.0  | -15.1 | 53.5 | 56.1 | 45.8 | 93.0 | 64.5 |                                |
| G   | 0.0  | -11.1 | 52.6 | 58.0 | 47.1 | 95.6 | 66.9 |                                |
| DR3 |      |       |      |      |      |      |      |                                |
| E   | 1.0  | -14.1 | 56.8 | 53.8 | 33.1 | 88.9 | 68.8 | 33.7/33.6                      |
| H   | 0.9  | -12.6 | 54.5 | 51.5 | 32.1 | 86.2 | 66.8 |                                |
| G   | 0.8  | -8.3  | 53.5 | 53.1 | 34.2 | 89.2 | 69.1 |                                |
| DR4 |      |       |      |      |      |      |      |                                |
| E   | 1.0  | -14.1 | 56.8 | 59.2 | 39.1 | 98.4 | 68.8 | 39.1/38.6                      |
| H   | 0.9  | -12.6 | 54.5 | 56.8 | 37.6 | 95.1 | 66.8 |                                |
| G   | 0.8  | -8.3  | 53.5 | 58.4 | 38.4 | 97.9 | 69.1 |                                |
| DR5 |      |       |      |      |      |      |      |                                |
| E   | 0.2  | -16.5 | 55.4 | 53.8 | 35.5 | 87.7 | 66.0 | 35.5/35.8                      |
| H   | 0.2  | -15.0 | 53.4 | 51.6 | 34.4 | 85.1 | 64.7 |                                |
| G   | 0.1  | -10.9 | 52.4 | 53.4 | 36.7 | 88.2 | 67.1 |                                |
| DR6 |      |       |      |      |      |      |      |                                |
| E   | 0.2  | -16.5 | 55.4 | 58.0 | 42.7 | 95.4 | 66.0 | 42.7/42.5                      |
| H   | 0.2  | -15.0 | 53.4 | 55.7 | 41.3 | 92.4 | 64.7 |                                |
| G   | 0.1  | -10.9 | 52.4 | 57.2 | 42.0 | 95.0 | 67.1 |                                |
| DR7 |      |       |      |      |      |      |      |                                |
| E   | 1.1  | -14.3 | 57.0 | 52.8 | 28.0 | 87.3 | 68.6 | 28.0/28.3                      |
| H   | 1.1  | -12.8 | 54.5 | 50.6 | 27.3 | 84.6 | 66.6 |                                |
| G   | 0.9  | -8.5  | 53.0 | 51.9 | 28.6 | 87.7 | 68.9 |                                |
| DR8 |      |       |      |      |      |      |      |                                |
| E   | 1.1  | -14.3 | 57.0 | 59.9 | 44.4 | 99.2 | 68.6 | 44.4/44.0                      |
| H   | 1.1  | -12.8 | 54.5 | 57.2 | 42.7 | 95.6 | 66.6 |                                |
| G   | 0.9  | -8.5  | 53.0 | 59.1 | 44.2 | 98.6 | 68.9 |                                |

**Table S5:** Relative Energies E, Enthalpies H, and Gibbs Free Energies G (in kcal/mol) Computed at the B3LYP-D3/6-31G\*/PCM Level.

| DR1 | R-S0 | P-S0 | R-T1 | TS1  | DR   | TS2   | P- T1 | T <sub>1</sub> /S <sub>0</sub> |
|-----|------|------|------|------|------|-------|-------|--------------------------------|
| E   | 0.0  | -5.2 | 55.6 | 54.2 | 38.8 | 94.2  | 77.9  | 39.0/39.2                      |
| H   | 0.0  | -3.7 | 53.6 | 52.5 | 38.1 | 91.9  | 76.6  |                                |
| G   | 0.0  | 0.7  | 52.7 | 54.2 | 40.1 | 95.5  | 79.3  |                                |
| DR2 |      |      |      |      |      |       |       |                                |
| E   | 0.0  | -5.2 | 55.6 | 62.7 | 55.6 | 104.2 | 77.9  | 55.8/55.9                      |
| H   | 0.0  | -3.7 | 53.6 | 60.2 | 54.0 | 101.3 | 76.6  |                                |
| G   | 0.0  | 0.7  | 52.7 | 62.4 | 55.8 | 104.3 | 79.3  |                                |
| DR3 |      |      |      |      |      |       |       |                                |
| E   | 1.0  | -2.4 | 56.4 | 55.9 | 41.2 | 97.5  | 80.8  | 41.7/41.5                      |
| H   | 0.8  | -0.8 | 54.1 | 53.6 | 40.2 | 94.9  | 79.0  |                                |
| G   | 0.5  | 4.0  | 52.9 | 55.7 | 42.6 | 98.3  | 81.6  |                                |
| DR4 |      |      |      |      |      |       |       |                                |
| E   | 1.0  | -2.4 | 56.4 | 62.1 | 47.4 | 106.6 | 80.8  | 47.6/47.0                      |
| H   | 0.8  | -0.8 | 54.1 | 59.7 | 46.0 | 103.7 | 79.0  |                                |
| G   | 0.5  | 4.0  | 52.9 | 61.7 | 47.3 | 107.3 | 81.6  |                                |
| DR5 |      |      |      |      |      |       |       |                                |
| E   | 0.3  | -5.1 | 55.9 | 56.3 | 43.7 | 95.9  | 78.0  | 43.8/44.0                      |
| H   | 0.3  | -3.6 | 53.8 | 54.1 | 42.6 | 93.6  | 76.7  |                                |
| G   | 0.2  | 0.9  | 52.9 | 56.3 | 45.2 | 97.1  | 79.4  |                                |
| DR6 |      |      |      |      |      |       |       |                                |
| E   | 0.3  | -5.1 | 55.9 | 61.5 | 50.9 | 103.4 | 78.0  | 51.0/50.7                      |
| H   | 0.3  | -3.6 | 53.8 | 59.2 | 49.5 | 100.7 | 76.7  |                                |
| G   | 0.2  | 0.9  | 52.9 | 60.9 | 50.5 | 103.7 | 79.4  |                                |
| DR7 |      |      |      |      |      |       |       |                                |
| E   | 1.1  | -2.5 | 56.4 | 54.3 | 36.1 | 96.1  | 80.7  | 36.2/36.4                      |
| H   | 0.4  | -0.9 | 54.2 | 52.1 | 35.4 | 93.7  | 78.8  |                                |
| G   | 1.7  | 3.9  | 53.2 | 53.8 | 37.2 | 97.3  | 81.4  |                                |
| DR8 |      |      |      |      |      |       |       |                                |
| E   | 1.1  | -2.5 | 56.4 | 63.3 | 52.7 | 107.4 | 80.7  | 52.8/52.4                      |
| H   | 0.4  | -0.9 | 54.2 | 60.7 | 51.2 | 104.2 | 78.8  |                                |
| G   | 1.7  | 3.9  | 53.2 | 63.2 | 53.3 | 107.7 | 81.4  |                                |

## Effects of Different Functionals on Energy Profiles of DR3-DR8

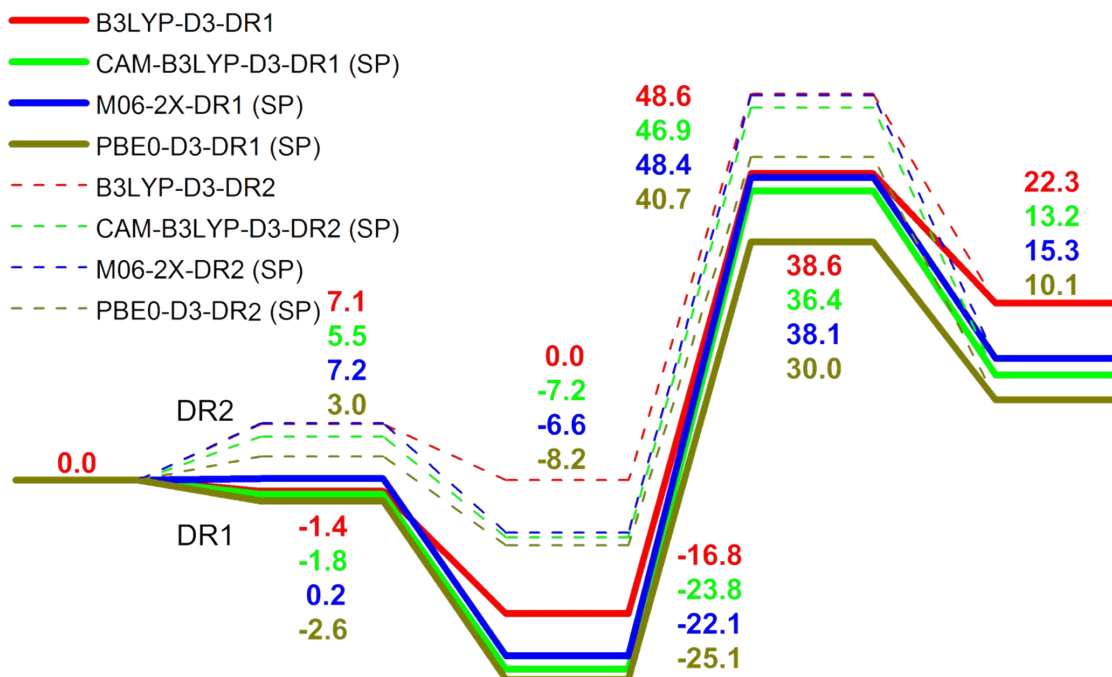

**Fig. S12:** Single-point energies from CAM-B3LYP-D3, M06-2X, and PBE0-D3 calculations on the B3LYP-D3 optimized geometries for pathways DR1 and DR2 (see text in the main article). The  $T_1$  reactant serves as reference point in each potential energy profile.

**Table S6:** Computed Differences (in kcal/mol) in the Potential Energy Barriers  $\Delta\Delta E^\ddagger_{\text{DR3:DR4}}$  and the Reaction Energies  $\Delta\Delta E^{\text{rx}}_{\text{DR3:DR4}}$  between Paths DR1 and DR2 by Different Exchange-Correlation Functionals (B3LYP-D3, CAM-B3LYP-D3, M06-2X, and PBE0-D3). See Fig. S12 for the Associated Potential Energy Profiles.

|              | first half reaction                        |                                               | second half reaction                       |                                               |
|--------------|--------------------------------------------|-----------------------------------------------|--------------------------------------------|-----------------------------------------------|
|              | $\Delta\Delta E^\ddagger_{\text{DR1:DR2}}$ | $\Delta\Delta E^{\text{rx}}_{\text{DR1:DR2}}$ | $\Delta\Delta E^\ddagger_{\text{DR1:DR2}}$ | $\Delta\Delta E^{\text{rx}}_{\text{DR1:DR2}}$ |
| B3LYP-D3     | -8.5                                       | -16.8                                         | 6.8                                        | 16.8                                          |
| CAM-B3LYP-D3 | -7.3                                       | -16.6                                         | 6.1                                        | 16.6                                          |
| M06-2X       | -7.0                                       | -15.5                                         | 5.2                                        | 15.5                                          |
| PBE0-D3      | -5.6                                       | -16.9                                         | 6.2                                        | 16.9                                          |

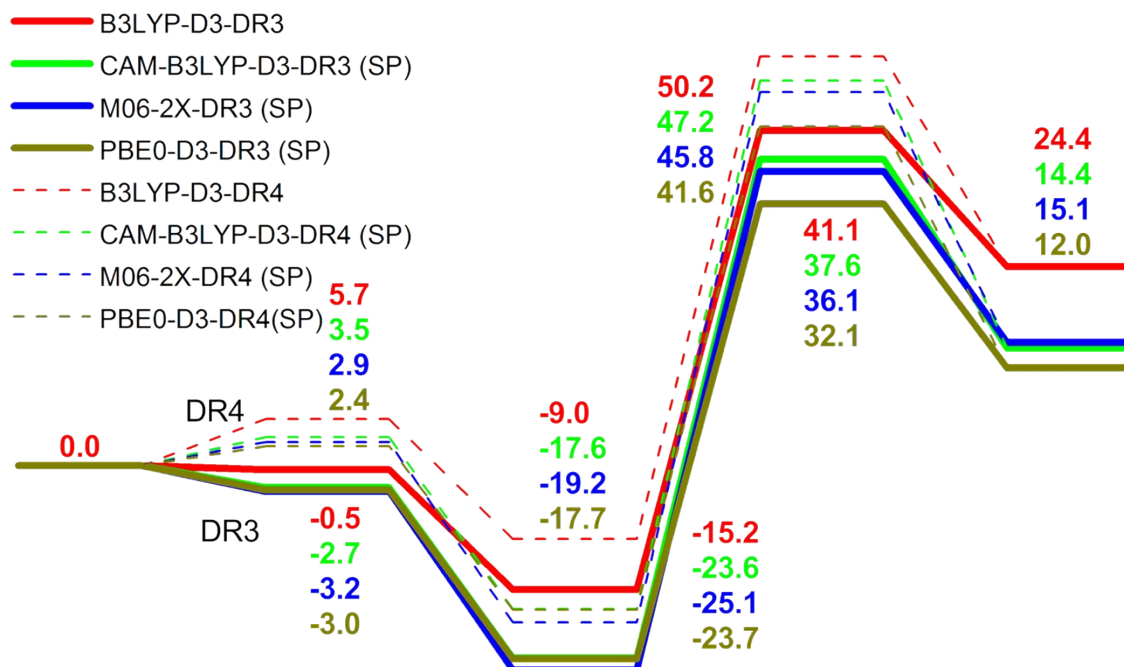

**Fig. S13:** Single-point energies from CAM-B3LYP-D3, M06-2X, and PBE0-D3 calculations on the B3LYP-D3 optimized geometries for pathways DR3 and DR4 (see text in the main article). The T<sub>1</sub> reactant serves as reference point in each potential energy profile.

**Table S7:** Computed Differences (in kcal/mol) in the Potential Energy Barriers  $\Delta\Delta E^{\ddagger}_{\text{DR3:DR4}}$  and the Reaction Energies  $\Delta\Delta E^{\text{rx}}_{\text{DR3:DR4}}$  between Paths DR3 and DR4 by Different Exchange-Correlation Functionals (B3LYP-D3, CAM-B3LYP-D3, M06-2X, and PBE0-D3). See Fig. S13 for the Associated Potential Energy Profiles.

|              | first half reaction                          |                                               | second half reaction                         |                                               |
|--------------|----------------------------------------------|-----------------------------------------------|----------------------------------------------|-----------------------------------------------|
|              | $\Delta\Delta E^{\ddagger}_{\text{DR3:DR4}}$ | $\Delta\Delta E^{\text{rx}}_{\text{DR3:DR4}}$ | $\Delta\Delta E^{\ddagger}_{\text{DR3:DR4}}$ | $\Delta\Delta E^{\text{rx}}_{\text{DR3:DR4}}$ |
| B3LYP-D3     | -6.2                                         | -6.2                                          | -2.9                                         | 6.2                                           |
| CAM-B3LYP-D3 | -6.2                                         | -6.0                                          | -3.6                                         | 6.0                                           |
| M06-2X       | -6.1                                         | -5.9                                          | -3.8                                         | 5.9                                           |
| PBE0-D3      | -5.4                                         | -6.0                                          | -3.5                                         | 6.0                                           |



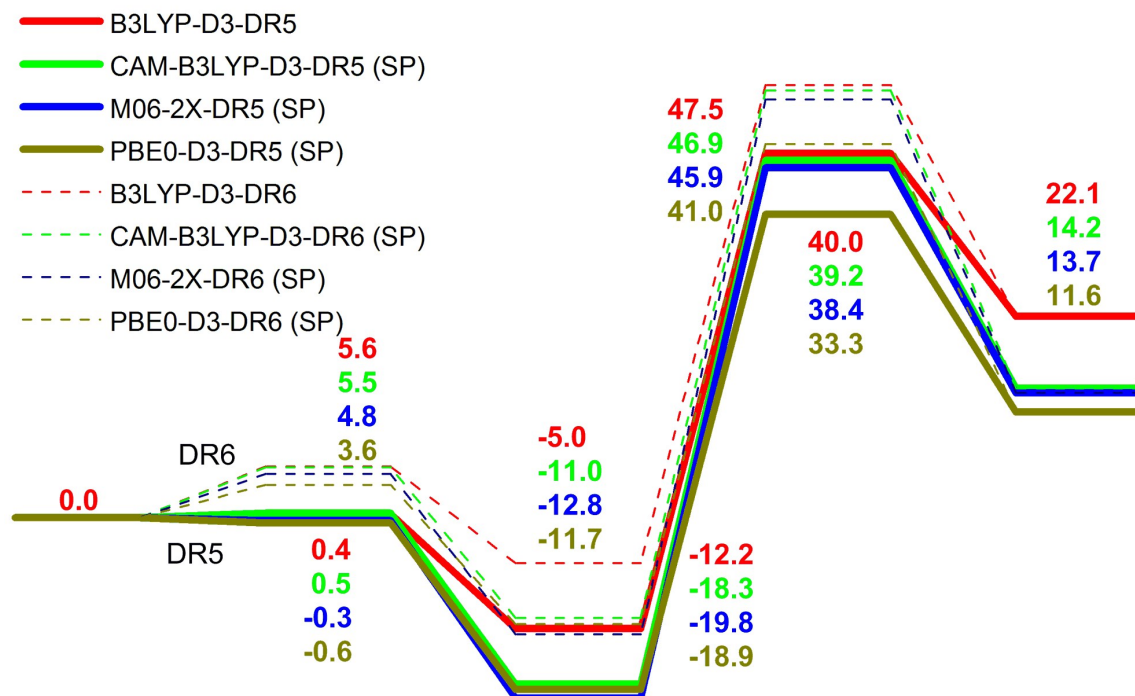

**Fig. S14:** Single-point energies from CAM-B3LYP-D3, M06-2X, and PBE0-D3 calculations on the B3LYP-D3 optimized geometries for pathways DR5 and DR6 (see text in the main article). The  $T_1$  reactant serves as reference point in each potential energy profile.

**Table S8:** Computed Differences (in kcal/mol) in the Potential Energy Barriers  $\Delta\Delta E^\ddagger_{\text{DR5:DR6}}$  and the Reaction Energies  $\Delta\Delta E^{\text{rx}}_{\text{DR5:DR6}}$  between Paths DR5 and DR6 by Different Exchange-Correlation Functionals (B3LYP-D3, CAM-B3LYP-D3, M06-2X, and PBE0-D3). See Fig. S14 for the Associated Potential Energy Profiles.

|              | first half reaction                        |                                               | second half reaction                       |                                               |
|--------------|--------------------------------------------|-----------------------------------------------|--------------------------------------------|-----------------------------------------------|
|              | $\Delta\Delta E^\ddagger_{\text{DR5:DR6}}$ | $\Delta\Delta E^{\text{rx}}_{\text{DR5:DR6}}$ | $\Delta\Delta E^\ddagger_{\text{DR5:DR6}}$ | $\Delta\Delta E^{\text{rx}}_{\text{DR5:DR6}}$ |
| B3LYP-D3     | -5.2                                       | -7.2                                          | -0.3                                       | 7.2                                           |
| CAM-B3LYP-D3 | -5.0                                       | -7.3                                          | -0.4                                       | 7.3                                           |
| M06-2X       | -5.1                                       | -7.0                                          | -0.5                                       | 7.0                                           |
| PBE0-D3      | -4.2                                       | -7.2                                          | -0.5                                       | 7.2                                           |

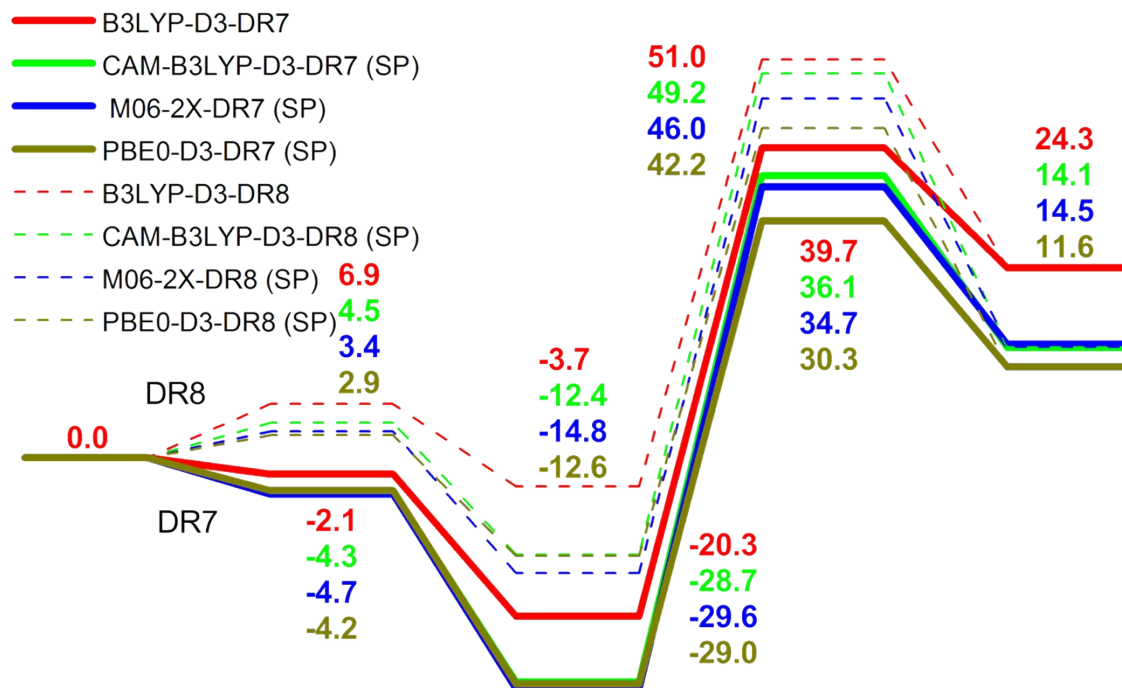

**Fig. S15:** Single-point energies from CAM-B3LYP-D3, M06-2X, and PBE0-D3 calculations on the B3LYP-D3 optimized geometries for pathways DR7 and DR8 (see text in the main article). The T<sub>1</sub> reactant serves as reference point in each potential energy profile.

**Table S9:** Computed Differences (in kcal/mol) in the Potential Energy Barriers  $\Delta\Delta E^{\ddagger}_{\text{DR7:DR8}}$  and the Reaction Energies  $\Delta\Delta E^{\text{rx}}_{\text{DR7:DR8}}$  between Paths DR7 and DR8 by Different Exchange-Correlation Functionals (B3LYP-D3, CAM-B3LYP-D3, M06-2X, and PBE0-D3). See Fig. S15 for the Associated Potential Energy Profiles.

|              | first half reaction                          |                                               | second half reaction                         |                                               |
|--------------|----------------------------------------------|-----------------------------------------------|----------------------------------------------|-----------------------------------------------|
|              | $\Delta\Delta E^{\ddagger}_{\text{DR7:DR8}}$ | $\Delta\Delta E^{\text{rx}}_{\text{DR7:DR8}}$ | $\Delta\Delta E^{\ddagger}_{\text{DR7:DR8}}$ | $\Delta\Delta E^{\text{rx}}_{\text{DR7:DR8}}$ |
| B3LYP-D3     | -9.0                                         | -16.6                                         | 5.3                                          | 16.6                                          |
| CAM-B3LYP-D3 | -8.8                                         | -16.3                                         | 3.2                                          | 16.3                                          |
| M06-2X       | -8.1                                         | -14.8                                         | 3.5                                          | 14.8                                          |
| PBE0-D3      | -7.1                                         | -16.4                                         | 4.5                                          | 16.4                                          |

**Table S10:** Computed Gibbs Free Energy Barriers (in kcal/mol) for A-C Interconversion Paths and A-B Interconversion Paths: Results from (I) B3LYP-D3/6-31G\*/PCM//B3LYP-D3/6-31G\*/PCM and (II) B3LYP-D3/6-31+G\*/PCM//B3LYP-D3/6-31+G\*/PCM.

| B3LYP-D3 | Barrier-S0-AC | Barrier-T1-AC | Barrier-S0-AB | Barrier-T1-AB |
|----------|---------------|---------------|---------------|---------------|
| I        | 33.8          | 19.7          | 4.0           | 4.3           |
| II       | 34.3          | 18.8          | 4.1           | 4.2           |

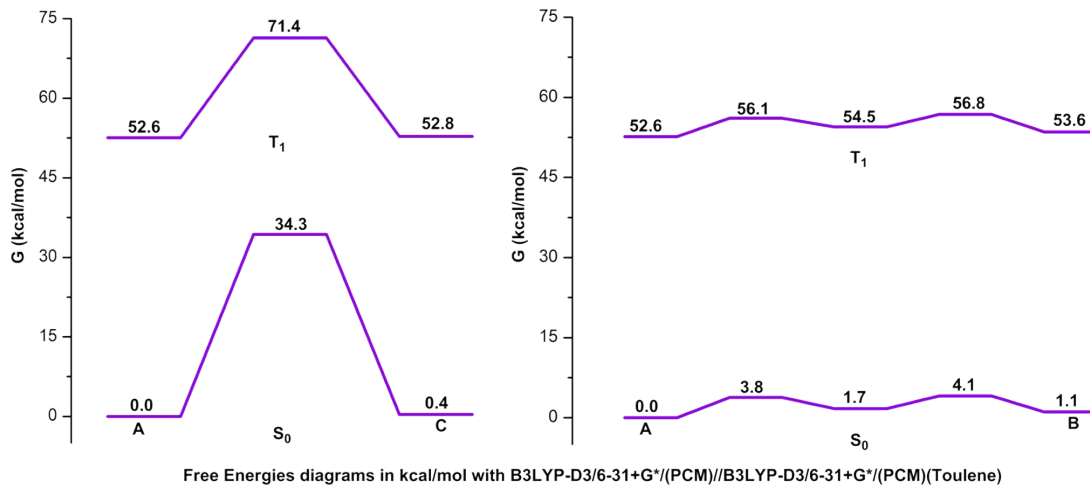

**Fig. S16:** Gibbs free energy profiles (kcal/mol) in the S<sub>0</sub> and T<sub>1</sub> states from B3LYP-D3/6-31+G\*/PCM//B3LYP-D3/6-31+G\*/PCM calculations.

## Cartesian Coordinates of All Optimized Structures

In xyz format (unit: Ångstrom)

### UB3LYP-D3/6-31G\*/PCM level in acetonitrile solution

A-S0-R

|   |              |              |              |
|---|--------------|--------------|--------------|
| C | -0.985878000 | -0.704512000 | 1.629982000  |
| C | -2.454476000 | -0.803762000 | 1.397764000  |
| C | -2.700300000 | -0.750735000 | 0.081176000  |
| C | -1.374998000 | -0.630501000 | -0.629361000 |
| N | -0.388064000 | -0.577390000 | 0.359777000  |
| H | -3.158859000 | -0.895806000 | 2.214520000  |
| O | -0.382543000 | -0.714564000 | 2.685701000  |
| O | -1.188309000 | -0.601134000 | -1.831269000 |
| C | 1.019101000  | -0.460430000 | 0.117994000  |
| C | 1.691924000  | -1.560520000 | -0.446923000 |
| C | 1.683974000  | 0.733734000  | 0.449714000  |
| C | 3.060535000  | -1.433329000 | -0.705458000 |
| C | 3.057736000  | 0.811496000  | 0.183167000  |
| C | 3.740609000  | -0.255556000 | -0.395362000 |
| H | 3.596319000  | -2.270766000 | -1.144339000 |
| H | 3.590757000  | 1.724943000  | 0.435332000  |
| H | 4.805489000  | -0.174899000 | -0.595447000 |
| C | 0.982787000  | 1.935967000  | 1.049676000  |
| H | 1.670305000  | 2.421196000  | 1.752327000  |
| H | 0.108642000  | 1.632676000  | 1.629450000  |
| C | 0.545183000  | 2.992099000  | -0.000303000 |
| H | 0.128507000  | 3.855557000  | 0.532546000  |
| H | 1.441077000  | 3.339791000  | -0.533889000 |
| C | -0.456921000 | 2.458899000  | -0.985005000 |
| H | -0.096039000 | 1.683269000  | -1.658821000 |
| C | -1.737382000 | 2.829767000  | -1.054975000 |
| H | -2.151106000 | 3.590470000  | -0.394946000 |
| H | -2.419478000 | 2.384199000  | -1.774942000 |
| C | -3.973989000 | -0.789810000 | -0.686342000 |
| H | -3.948236000 | -1.596557000 | -1.428016000 |
| H | -4.107956000 | 0.146117000  | -1.242443000 |
| H | -4.832653000 | -0.935417000 | -0.027024000 |
| C | 0.961266000  | -2.841963000 | -0.766597000 |
| H | 1.666012000  | -3.640404000 | -1.014495000 |
| H | 0.285364000  | -2.706693000 | -1.618404000 |

|   |             |              |             |
|---|-------------|--------------|-------------|
| H | 0.350085000 | -3.175423000 | 0.079804000 |
|---|-------------|--------------|-------------|

B-S0-R

|   |              |              |              |
|---|--------------|--------------|--------------|
| C | -1.260458000 | -0.621078000 | 1.590808000  |
| C | -2.713597000 | -0.419064000 | 1.330506000  |
| C | -2.903467000 | -0.197886000 | 0.022226000  |
| C | -1.555801000 | -0.257697000 | -0.655889000 |
| N | -0.607237000 | -0.479811000 | 0.349269000  |
| H | -3.448966000 | -0.458354000 | 2.123936000  |
| O | -0.705527000 | -0.853813000 | 2.647533000  |
| O | -1.332342000 | -0.153427000 | -1.846013000 |
| C | 0.802133000  | -0.628341000 | 0.142881000  |
| C | 1.259753000  | -1.768146000 | -0.546641000 |
| C | 1.683482000  | 0.347629000  | 0.640338000  |
| C | 2.635159000  | -1.898483000 | -0.763754000 |
| C | 3.054220000  | 0.167491000  | 0.411070000  |
| C | 3.528708000  | -0.937458000 | -0.290898000 |
| H | 3.006149000  | -2.769237000 | -1.297851000 |
| H | 3.751657000  | 0.910889000  | 0.789403000  |
| H | 4.595243000  | -1.057428000 | -0.460345000 |
| C | 1.226290000  | 1.592174000  | 1.372496000  |
| H | 1.936484000  | 1.798770000  | 2.181771000  |
| H | 0.255081000  | 1.440402000  | 1.848633000  |
| C | 1.155407000  | 2.842920000  | 0.458831000  |
| H | 0.959475000  | 3.712372000  | 1.102450000  |
| H | 2.132464000  | 3.004051000  | -0.013489000 |
| C | -4.140231000 | 0.063791000  | -0.762221000 |
| H | -4.255119000 | -0.686714000 | -1.553157000 |
| H | -4.075359000 | 1.038583000  | -1.260479000 |
| H | -5.026941000 | 0.049345000  | -0.124418000 |
| C | 0.085122000  | 2.738977000  | -0.590677000 |
| H | -0.934265000 | 2.631292000  | -0.215085000 |
| C | 0.297353000  | 2.738317000  | -1.907183000 |
| H | 1.299725000  | 2.831598000  | -2.321633000 |
| H | -0.517723000 | 2.632503000  | -2.617616000 |
| C | 0.301080000  | -2.824639000 | -1.040105000 |
| H | 0.838274000  | -3.732500000 | -1.328130000 |
| H | -0.260931000 | -2.469576000 | -1.911098000 |
| H | -0.432547000 | -3.090447000 | -0.270673000 |

C-S0-R

|   |             |              |              |
|---|-------------|--------------|--------------|
| C | 1.387041000 | -0.765854000 | -1.008078000 |
| C | 2.765814000 | -0.749337000 | -0.395628000 |
| C | 2.623341000 | -0.547174000 | 0.921686000  |
| C | 1.175276000 | -0.427818000 | 1.251005000  |
| N | 0.477573000 | -0.545056000 | 0.032265000  |

|   |              |              |              |
|---|--------------|--------------|--------------|
| O | 1.103456000  | -0.928413000 | -2.179529000 |
| O | 0.660214000  | -0.272682000 | 2.342015000  |
| C | -0.947402000 | -0.507002000 | -0.111249000 |
| C | -1.697834000 | -1.582979000 | 0.400532000  |
| C | -1.552009000 | 0.585772000  | -0.758502000 |
| C | -3.090072000 | -1.532055000 | 0.277611000  |
| C | -2.949164000 | 0.587509000  | -0.869132000 |
| C | -3.714038000 | -0.454551000 | -0.350994000 |
| H | -3.686105000 | -2.351919000 | 0.669481000  |
| H | -3.435505000 | 1.421925000  | -1.368369000 |
| H | -4.796229000 | -0.433757000 | -0.445542000 |
| C | -0.771602000 | 1.764596000  | -1.304371000 |
| H | -1.264574000 | 2.110849000  | -2.220323000 |
| H | 0.241040000  | 1.470584000  | -1.587859000 |
| C | -0.687883000 | 2.961592000  | -0.319942000 |
| H | -0.191844000 | 3.795766000  | -0.831169000 |
| H | -1.711239000 | 3.286236000  | -0.083968000 |
| C | 0.043948000  | 2.622196000  | 0.947871000  |
| H | -0.436489000 | 1.887726000  | 1.592469000  |
| C | 1.234663000  | 3.111074000  | 1.301117000  |
| H | 1.762306000  | 3.836433000  | 0.683756000  |
| H | 1.727107000  | 2.800176000  | 2.219089000  |
| C | -1.025626000 | -2.760170000 | 1.064264000  |
| H | -1.731659000 | -3.583374000 | 1.203749000  |
| H | -0.627127000 | -2.481861000 | 2.046271000  |
| H | -0.183515000 | -3.128583000 | 0.467603000  |
| C | 3.978502000  | -0.935168000 | -1.237312000 |
| H | 4.889707000  | -0.893970000 | -0.636244000 |
| H | 3.937430000  | -1.899167000 | -1.758207000 |
| H | 4.026178000  | -0.160449000 | -2.011887000 |
| H | 3.390415000  | -0.476258000 | 1.682120000  |

#### D-S0-R

|   |              |              |              |
|---|--------------|--------------|--------------|
| C | 1.695030000  | -0.437631000 | -0.920716000 |
| C | 2.999070000  | -0.104435000 | -0.238763000 |
| C | 2.736840000  | 0.106485000  | 1.058588000  |
| C | 1.278787000  | -0.080020000 | 1.307782000  |
| N | 0.696290000  | -0.377654000 | 0.058063000  |
| O | 1.525973000  | -0.701157000 | -2.095979000 |
| O | 0.683083000  | -0.015393000 | 2.364923000  |
| C | -0.689375000 | -0.664340000 | -0.164231000 |
| C | -1.219662000 | -1.853857000 | 0.372991000  |
| C | -1.471548000 | 0.227602000  | -0.918562000 |
| C | -2.577130000 | -2.121032000 | 0.169011000  |
| C | -2.823565000 | -0.088639000 | -1.108423000 |
| C | -3.376944000 | -1.244768000 | -0.564580000 |

|   |              |              |              |
|---|--------------|--------------|--------------|
| H | -3.004366000 | -3.031968000 | 0.579879000  |
| H | -3.443965000 | 0.588550000  | -1.690393000 |
| H | -4.428119000 | -1.470664000 | -0.721358000 |
| C | -0.939079000 | 1.520431000  | -1.501175000 |
| H | -1.379290000 | 1.661188000  | -2.495380000 |
| H | 0.142146000  | 1.474953000  | -1.648663000 |
| C | -1.283071000 | 2.761797000  | -0.638163000 |
| H | -0.975508000 | 3.653410000  | -1.202980000 |
| H | -2.370419000 | 2.822662000  | -0.505280000 |
| C | -0.599211000 | 2.746939000  | 0.699541000  |
| H | 0.492064000  | 2.743527000  | 0.670985000  |
| C | -1.220565000 | 2.704069000  | 1.878628000  |
| H | -2.306929000 | 2.693074000  | 1.948879000  |
| H | -0.669434000 | 2.664652000  | 2.814060000  |
| C | -0.355073000 | -2.818789000 | 1.147278000  |
| H | -0.863480000 | -3.778176000 | 1.276818000  |
| H | -0.115560000 | -2.421825000 | 2.139884000  |
| H | 0.596978000  | -3.002073000 | 0.636454000  |
| C | 4.273188000  | -0.059141000 | -1.005904000 |
| H | 5.118486000  | 0.185726000  | -0.358745000 |
| H | 4.461405000  | -1.025028000 | -1.489518000 |
| H | 4.209128000  | 0.686922000  | -1.806978000 |
| H | 3.424215000  | 0.363020000  | 1.854519000  |

#### A'-S0-R

|   |              |              |              |
|---|--------------|--------------|--------------|
| C | 0.985878000  | -0.704512000 | 1.629982000  |
| C | 2.454476000  | -0.803762000 | 1.397764000  |
| C | 2.700300000  | -0.750735000 | 0.081176000  |
| C | 1.374998000  | -0.630501000 | -0.629361000 |
| N | 0.388064000  | -0.577390000 | 0.359777000  |
| O | 0.382543000  | -0.714564000 | 2.685701000  |
| O | 1.188309000  | -0.601134000 | -1.831269000 |
| C | -1.019101000 | -0.460430000 | 0.117994000  |
| C | -1.691924000 | -1.560520000 | -0.446923000 |
| C | -1.683974000 | 0.733734000  | 0.449714000  |
| C | -3.060535000 | -1.433329000 | -0.705458000 |
| C | -3.057736000 | 0.811496000  | 0.183167000  |
| C | -3.740609000 | -0.255556000 | -0.395362000 |
| C | -0.982787000 | 1.935967000  | 1.049676000  |
| C | -0.545183000 | 2.992099000  | -0.000303000 |
| C | 0.456921000  | 2.458899000  | -0.985005000 |
| C | 1.737382000  | 2.829767000  | -1.054975000 |
| C | 3.973989000  | -0.789810000 | -0.686342000 |
| C | -0.961266000 | -2.841963000 | -0.766597000 |
| H | 3.158859000  | -0.895806000 | 2.214520000  |
| H | -3.596319000 | -2.270766000 | -1.144339000 |

|   |              |              |              |
|---|--------------|--------------|--------------|
| H | -3.590757000 | 1.724943000  | 0.435332000  |
| H | -4.805489000 | -0.174899000 | -0.595447000 |
| H | -1.670305000 | 2.421196000  | 1.752327000  |
| H | -0.108642000 | 1.632676000  | 1.629450000  |
| H | -0.128507000 | 3.855557000  | 0.532546000  |
| H | -1.441077000 | 3.339791000  | -0.533889000 |
| H | 0.096039000  | 1.683269000  | -1.658821000 |
| H | 2.151106000  | 3.590470000  | -0.394946000 |
| H | 2.419478000  | 2.384199000  | -1.774942000 |
| H | 3.948236000  | -1.596557000 | -1.428016000 |
| H | 4.107956000  | 0.146117000  | -1.242443000 |
| H | 4.832653000  | -0.935417000 | -0.027024000 |
| H | -1.666012000 | -3.640404000 | -1.014495000 |
| H | -0.285364000 | -2.706693000 | -1.618404000 |
| H | -0.350085000 | -3.175423000 | 0.079804000  |

B'-S0-R

|   |              |              |              |
|---|--------------|--------------|--------------|
| C | 1.260458000  | -0.621078000 | 1.590808000  |
| C | 2.713597000  | -0.419064000 | 1.330506000  |
| C | 2.903467000  | -0.197886000 | 0.022226000  |
| C | 1.555801000  | -0.257697000 | -0.655889000 |
| N | 0.607237000  | -0.479811000 | 0.349269000  |
| O | 0.705527000  | -0.853813000 | 2.647533000  |
| O | 1.332342000  | -0.153427000 | -1.846013000 |
| C | -0.802133000 | -0.628341000 | 0.142881000  |
| C | -1.259753000 | -1.768146000 | -0.546641000 |
| C | -1.683482000 | 0.347629000  | 0.640338000  |
| C | -2.635159000 | -1.898483000 | -0.763754000 |
| C | -3.054220000 | 0.167491000  | 0.411070000  |
| C | -3.528708000 | -0.937458000 | -0.290898000 |
| C | -1.226290000 | 1.592174000  | 1.372496000  |
| C | -1.155407000 | 2.842920000  | 0.458831000  |
| C | 4.140231000  | 0.063791000  | -0.762221000 |
| C | -0.085122000 | 2.738977000  | -0.590677000 |
| C | -0.297353000 | 2.738317000  | -1.907183000 |
| C | -0.301080000 | -2.824639000 | -1.040105000 |
| H | 3.448966000  | -0.458354000 | 2.123936000  |
| H | -3.006149000 | -2.769237000 | -1.297851000 |
| H | -3.751657000 | 0.910889000  | 0.789403000  |
| H | -4.595243000 | -1.057428000 | -0.460345000 |
| H | -1.936484000 | 1.798770000  | 2.181771000  |
| H | -0.255081000 | 1.440402000  | 1.848633000  |
| H | -0.959475000 | 3.712372000  | 1.102450000  |
| H | -2.132464000 | 3.004051000  | -0.013489000 |
| H | 4.255119000  | -0.686714000 | -1.553157000 |
| H | 4.075359000  | 1.038583000  | -1.260479000 |



|   |              |              |              |
|---|--------------|--------------|--------------|
| H | 5.026941000  | 0.049345000  | -0.124418000 |
| H | 0.934265000  | 2.631292000  | -0.215085000 |
| H | -1.299725000 | 2.831598000  | -2.321633000 |
| H | 0.517723000  | 2.632503000  | -2.617616000 |
| H | -0.838274000 | -3.732500000 | -1.328130000 |
| H | 0.260931000  | -2.469576000 | -1.911098000 |
| H | 0.432547000  | -3.090447000 | -0.270673000 |

C'-S0-R

|   |              |              |              |
|---|--------------|--------------|--------------|
| C | 1.387041000  | -0.765854000 | 1.008078000  |
| C | 2.765814000  | -0.749337000 | 0.395628000  |
| C | 2.623341000  | -0.547174000 | -0.921686000 |
| C | 1.175276000  | -0.427818000 | -1.251005000 |
| N | 0.477573000  | -0.545056000 | -0.032265000 |
| O | 1.103456000  | -0.928413000 | 2.179529000  |
| O | 0.660214000  | -0.272682000 | -2.342015000 |
| C | -0.947402000 | -0.507002000 | 0.111249000  |
| C | -1.697834000 | -1.582979000 | -0.400532000 |
| C | -1.552009000 | 0.585772000  | 0.758502000  |
| C | -3.090072000 | -1.532055000 | -0.277611000 |
| C | -2.949164000 | 0.587509000  | 0.869132000  |
| C | -3.714038000 | -0.454551000 | 0.350994000  |
| C | -0.771602000 | 1.764596000  | 1.304371000  |
| C | -0.687883000 | 2.961592000  | 0.319942000  |
| C | 0.043948000  | 2.622196000  | -0.947871000 |
| C | 1.234663000  | 3.111074000  | -1.301117000 |
| C | -1.025626000 | -2.760170000 | -1.064264000 |
| C | 3.978502000  | -0.935168000 | 1.237312000  |
| H | 3.390415000  | -0.476258000 | -1.682120000 |
| H | -3.686105000 | -2.351919000 | -0.669481000 |
| H | -3.435505000 | 1.421925000  | 1.368369000  |
| H | -4.796229000 | -0.433757000 | 0.445542000  |
| H | -1.264574000 | 2.110849000  | 2.220323000  |
| H | 0.241040000  | 1.470584000  | 1.587859000  |
| H | -0.191844000 | 3.795766000  | 0.831169000  |
| H | -1.711239000 | 3.286236000  | 0.083968000  |
| H | -0.436489000 | 1.887726000  | -1.592469000 |
| H | 1.762306000  | 3.836433000  | -0.683756000 |
| H | 1.727107000  | 2.800176000  | -2.219089000 |
| H | -1.731659000 | -3.583374000 | -1.203749000 |
| H | -0.627127000 | -2.481861000 | -2.046271000 |
| H | -0.183515000 | -3.128583000 | -0.467603000 |
| H | 4.889707000  | -0.893970000 | 0.636244000  |
| H | 3.937430000  | -1.899167000 | 1.758207000  |
| H | 4.026178000  | -0.160449000 | 2.011887000  |

D'-S0-R

|   |              |              |              |
|---|--------------|--------------|--------------|
| C | -1.695030000 | -0.437631000 | -0.920716000 |
| C | -2.999070000 | -0.104435000 | -0.238763000 |
| C | -2.736840000 | 0.106485000  | 1.058588000  |
| C | -1.278787000 | -0.080020000 | 1.307782000  |
| N | -0.696290000 | -0.377654000 | 0.058063000  |
| O | -1.525973000 | -0.701157000 | -2.095979000 |
| O | -0.683083000 | -0.015393000 | 2.364923000  |
| C | 0.689375000  | -0.664340000 | -0.164231000 |
| C | 1.219662000  | -1.853857000 | 0.372991000  |
| C | 1.471548000  | 0.227602000  | -0.918562000 |
| C | 2.577130000  | -2.121032000 | 0.169011000  |
| C | 2.823565000  | -0.088639000 | -1.108423000 |
| C | 3.376944000  | -1.244768000 | -0.564580000 |
| C | 0.939079000  | 1.520431000  | -1.501175000 |
| C | 1.283071000  | 2.761797000  | -0.638163000 |
| C | 0.599211000  | 2.746939000  | 0.699541000  |
| C | 1.220565000  | 2.704069000  | 1.878628000  |
| C | 0.355073000  | -2.818789000 | 1.147278000  |
| C | -4.273188000 | -0.059141000 | -1.005904000 |
| H | -3.424215000 | 0.363020000  | 1.854519000  |
| H | 3.004366000  | -3.031968000 | 0.579879000  |
| H | 3.443965000  | 0.588550000  | -1.690393000 |
| H | 4.428119000  | -1.470664000 | -0.721358000 |
| H | 1.379290000  | 1.661188000  | -2.495380000 |
| H | -0.142146000 | 1.474953000  | -1.648663000 |
| H | 0.975508000  | 3.653410000  | -1.202980000 |
| H | 2.370419000  | 2.822662000  | -0.505280000 |
| H | -0.492064000 | 2.743527000  | 0.670985000  |
| H | 2.306929000  | 2.693074000  | 1.948879000  |
| H | 0.669434000  | 2.664652000  | 2.814060000  |
| H | 0.863480000  | -3.778176000 | 1.276818000  |
| H | 0.115560000  | -2.421825000 | 2.139884000  |
| H | -0.596978000 | -3.002073000 | 0.636454000  |
| H | -5.118486000 | 0.185726000  | -0.358745000 |
| H | -4.461405000 | -1.025028000 | -1.489518000 |
| H | -4.209128000 | 0.686922000  | -1.806978000 |

A-S0-P

|   |              |              |              |
|---|--------------|--------------|--------------|
| C | -0.769336000 | -0.479006000 | 1.480574000  |
| C | -2.237403000 | -0.435423000 | 1.098288000  |
| C | -2.219846000 | -0.529925000 | -0.449478000 |
| C | -0.824368000 | -0.924548000 | -0.822307000 |
| N | -0.021652000 | -0.700169000 | 0.313706000  |
| H | -2.839321000 | -1.139571000 | 1.677390000  |
| O | -0.280067000 | -0.274484000 | 2.575332000  |

|   |              |              |              |
|---|--------------|--------------|--------------|
| O | -0.390389000 | -1.249346000 | -1.910763000 |
| C | 1.295578000  | -0.166977000 | 0.129265000  |
| C | 2.409806000  | -1.008384000 | 0.072383000  |
| C | 1.358336000  | 1.222984000  | -0.073332000 |
| C | 3.651348000  | -0.415429000 | -0.186931000 |
| C | 2.618970000  | 1.773565000  | -0.333628000 |
| C | 3.753471000  | 0.961525000  | -0.389961000 |
| H | 4.539325000  | -1.040002000 | -0.236070000 |
| H | 2.711514000  | 2.844775000  | -0.492538000 |
| H | 4.723648000  | 1.405638000  | -0.595278000 |
| C | 0.128565000  | 2.115286000  | 0.049855000  |
| H | 0.474458000  | 3.142846000  | -0.097765000 |
| H | -0.221229000 | 2.081679000  | 1.088797000  |
| C | -1.086990000 | 1.911583000  | -0.916446000 |
| H | -1.484693000 | 2.914992000  | -1.105283000 |
| H | -0.726200000 | 1.547475000  | -1.886450000 |
| C | -2.321656000 | 1.065839000  | -0.498267000 |
| H | -3.140362000 | 1.361409000  | -1.161306000 |
| C | -2.725966000 | 1.038692000  | 1.005032000  |
| H | -2.253894000 | 1.756770000  | 1.680744000  |
| H | -3.809134000 | 1.100992000  | 1.135529000  |
| C | -3.324570000 | -1.276385000 | -1.170680000 |
| H | -3.301922000 | -2.343448000 | -0.923580000 |
| H | -3.203350000 | -1.170688000 | -2.253643000 |
| H | -4.306389000 | -0.880315000 | -0.891652000 |
| C | 2.251655000  | -2.495012000 | 0.270213000  |
| H | 3.219177000  | -3.003615000 | 0.235598000  |
| H | 1.608759000  | -2.921099000 | -0.508706000 |
| H | 1.779271000  | -2.716326000 | 1.234232000  |

B-S0-P

|   |              |              |              |
|---|--------------|--------------|--------------|
| C | 0.765527000  | -0.140506000 | 1.457258000  |
| C | 2.126967000  | -0.447837000 | 0.942264000  |
| C | 2.419490000  | 0.576817000  | -0.181912000 |
| C | 0.996036000  | 0.981408000  | -0.586818000 |
| N | 0.102671000  | 0.513500000  | 0.391994000  |
| H | 2.888385000  | -0.590626000 | 1.708057000  |
| O | 0.234874000  | -0.441892000 | 2.507654000  |
| O | 0.664718000  | 1.577958000  | -1.593660000 |
| C | -1.268735000 | 0.195443000  | 0.123406000  |
| C | -2.235942000 | 1.204879000  | 0.054613000  |
| C | -1.559215000 | -1.170074000 | -0.077149000 |
| C | -3.553242000 | 0.820361000  | -0.224151000 |
| C | -2.890929000 | -1.506385000 | -0.344600000 |
| C | -3.878390000 | -0.521998000 | -0.417856000 |
| H | -4.326402000 | 1.581721000  | -0.284615000 |

|   |              |              |              |
|---|--------------|--------------|--------------|
| H | -3.153425000 | -2.548435000 | -0.507748000 |
| H | -4.905737000 | -0.803689000 | -0.631848000 |
| C | -0.489017000 | -2.260215000 | -0.012212000 |
| H | -0.953896000 | -3.184999000 | -0.366524000 |
| H | -0.219936000 | -2.452865000 | 1.033473000  |
| C | 0.793088000  | -2.003246000 | -0.862522000 |
| H | 1.033346000  | -2.921770000 | -1.409403000 |
| H | 0.535910000  | -1.277203000 | -1.641525000 |
| C | 3.315712000  | 1.782988000  | 0.053705000  |
| H | 2.916418000  | 2.426487000  | 0.846117000  |
| H | 3.394128000  | 2.376787000  | -0.863473000 |
| H | 4.319278000  | 1.457644000  | 0.345142000  |
| C | 2.129934000  | -1.582075000 | -0.178341000 |
| H | 2.672557000  | -2.470979000 | 0.150636000  |
| C | 2.926636000  | -0.589574000 | -1.077603000 |
| H | 2.676895000  | -0.557881000 | -2.142813000 |
| H | 4.009606000  | -0.699208000 | -0.964277000 |
| C | -1.856611000 | 2.647603000  | 0.276974000  |
| H | -2.741387000 | 3.290209000  | 0.288362000  |
| H | -1.182733000 | 2.993820000  | -0.514091000 |
| H | -1.326292000 | 2.772414000  | 1.228289000  |

C-S0-P

|   |              |              |              |
|---|--------------|--------------|--------------|
| C | 1.009453000  | -0.761366000 | -0.933640000 |
| C | 2.400173000  | -0.520879000 | -0.354137000 |
| C | 2.085250000  | -0.130491000 | 1.113015000  |
| C | 0.668569000  | -0.514676000 | 1.374588000  |
| N | 0.072532000  | -0.688726000 | 0.105736000  |
| O | 0.723698000  | -0.926957000 | -2.104664000 |
| O | 0.053479000  | -0.545655000 | 2.422319000  |
| C | -1.266855000 | -0.221392000 | -0.095169000 |
| C | -2.356158000 | -1.087442000 | 0.032353000  |
| C | -1.393313000 | 1.157648000  | -0.339048000 |
| C | -3.636089000 | -0.537791000 | -0.108720000 |
| C | -2.691565000 | 1.665600000  | -0.469491000 |
| C | -3.801104000 | 0.825728000  | -0.355517000 |
| H | -4.505417000 | -1.183525000 | -0.017863000 |
| H | -2.833033000 | 2.725715000  | -0.662843000 |
| H | -4.801140000 | 1.237938000  | -0.458542000 |
| C | -0.182413000 | 2.064388000  | -0.527352000 |
| H | -0.574370000 | 3.061617000  | -0.749203000 |
| H | 0.341575000  | 1.758166000  | -1.441204000 |
| C | 0.854101000  | 2.243454000  | 0.633209000  |
| H | 1.192797000  | 3.283319000  | 0.566432000  |
| H | 0.340214000  | 2.159344000  | 1.598908000  |
| C | 2.159130000  | 1.401916000  | 0.690109000  |

|   |              |              |              |
|---|--------------|--------------|--------------|
| H | 2.848520000  | 1.939774000  | 1.345503000  |
| C | 2.814259000  | 0.953991000  | -0.648645000 |
| H | 2.447533000  | 1.394628000  | -1.579966000 |
| H | 3.902920000  | 1.058628000  | -0.621735000 |
| C | -2.135255000 | -2.550232000 | 0.326398000  |
| H | -3.083781000 | -3.093099000 | 0.364425000  |
| H | -1.624816000 | -2.676435000 | 1.288129000  |
| H | -1.501751000 | -3.015151000 | -0.437862000 |
| C | 3.380169000  | -1.635521000 | -0.681837000 |
| H | 3.469077000  | -1.749220000 | -1.767527000 |
| H | 4.369024000  | -1.404237000 | -0.273504000 |
| H | 3.047100000  | -2.591444000 | -0.261933000 |
| H | 2.790295000  | -0.421648000 | 1.890705000  |

D-S0-P

|   |              |              |              |
|---|--------------|--------------|--------------|
| C | 0.902018000  | 0.133552000  | 1.236570000  |
| C | 2.246861000  | 0.077874000  | 0.587940000  |
| C | 2.205764000  | 1.126141000  | -0.551774000 |
| C | 0.707648000  | 1.307385000  | -0.780419000 |
| N | 0.022928000  | 0.676200000  | 0.275113000  |
| O | 0.556631000  | -0.276845000 | 2.327356000  |
| O | 0.163007000  | 1.842139000  | -1.727054000 |
| C | -1.295175000 | 0.127973000  | 0.144878000  |
| C | -2.422096000 | 0.956356000  | 0.205225000  |
| C | -1.369612000 | -1.265798000 | -0.059099000 |
| C | -3.677119000 | 0.353288000  | 0.056997000  |
| C | -2.645874000 | -1.823695000 | -0.192887000 |
| C | -3.788417000 | -1.023370000 | -0.136293000 |
| H | -4.570301000 | 0.970936000  | 0.098330000  |
| H | -2.743476000 | -2.894114000 | -0.354453000 |
| H | -4.769853000 | -1.475889000 | -0.248520000 |
| C | -0.130329000 | -2.157899000 | -0.136616000 |
| H | -0.468744000 | -3.144812000 | -0.465940000 |
| H | 0.278612000  | -2.312168000 | 0.869215000  |
| C | 0.990328000  | -1.679144000 | -1.108783000 |
| H | 1.322762000  | -2.539003000 | -1.701054000 |
| H | 0.532313000  | -1.002774000 | -1.838932000 |
| C | 2.301968000  | -1.040144000 | -0.559273000 |
| H | 3.019803000  | -1.825734000 | -0.307554000 |
| C | 2.813270000  | 0.076914000  | -1.520582000 |
| H | 2.441436000  | 0.064295000  | -2.549241000 |
| H | 3.903220000  | 0.156931000  | -1.533566000 |
| C | -2.274219000 | 2.441056000  | 0.426200000  |
| H | -3.249941000 | 2.919993000  | 0.546830000  |
| H | -1.758459000 | 2.906358000  | -0.420595000 |
| H | -1.674846000 | 2.647632000  | 1.320586000  |

|   |             |              |              |
|---|-------------|--------------|--------------|
| C | 3.424613000 | 0.060640000  | 1.541699000  |
| H | 3.452740000 | 0.976551000  | 2.141835000  |
| H | 3.342521000 | -0.792942000 | 2.222280000  |
| H | 4.370199000 | -0.022621000 | 0.996821000  |
| H | 2.716646000 | 2.084839000  | -0.426942000 |

A-T1-R

|   |              |              |              |
|---|--------------|--------------|--------------|
| C | -0.982425000 | -0.448263000 | 1.717383000  |
| C | -2.383621000 | -0.651937000 | 1.510103000  |
| C | -2.644241000 | -0.811777000 | 0.067465000  |
| C | -1.385737000 | -0.779012000 | -0.614604000 |
| N | -0.401946000 | -0.538871000 | 0.405091000  |
| H | -3.104052000 | -0.762933000 | 2.308929000  |
| O | -0.331788000 | -0.279364000 | 2.748840000  |
| O | -1.130646000 | -0.859055000 | -1.818945000 |
| C | 0.986078000  | -0.452052000 | 0.149095000  |
| C | 1.643731000  | -1.587949000 | -0.385482000 |
| C | 1.680960000  | 0.747506000  | 0.435450000  |
| C | 3.013683000  | -1.493922000 | -0.636506000 |
| C | 3.051172000  | 0.787266000  | 0.160556000  |
| C | 3.715035000  | -0.317010000 | -0.371518000 |
| H | 3.538041000  | -2.359851000 | -1.030928000 |
| H | 3.599487000  | 1.704241000  | 0.359837000  |
| H | 4.780991000  | -0.264005000 | -0.573669000 |
| C | 1.000553000  | 2.008925000  | 0.922329000  |
| H | 1.709614000  | 2.558163000  | 1.552386000  |
| H | 0.138928000  | 1.779102000  | 1.550068000  |
| C | 0.554326000  | 2.951989000  | -0.229345000 |
| H | 0.171091000  | 3.877357000  | 0.217793000  |
| H | 1.443301000  | 3.219401000  | -0.818109000 |
| C | -0.486396000 | 2.343246000  | -1.127273000 |
| H | -0.173010000 | 1.477254000  | -1.708650000 |
| C | -1.750994000 | 2.758910000  | -1.224808000 |
| H | -2.120937000 | 3.610903000  | -0.656463000 |
| H | -2.464559000 | 2.258254000  | -1.874698000 |
| C | -3.960210000 | -0.846239000 | -0.599502000 |
| H | -3.841335000 | -1.010640000 | -1.673181000 |
| H | -4.501398000 | 0.100661000  | -0.445874000 |
| H | -4.597392000 | -1.634674000 | -0.174738000 |
| C | 0.911698000  | -2.881446000 | -0.638158000 |
| H | 1.617901000  | -3.704968000 | -0.773351000 |
| H | 0.291490000  | -2.803695000 | -1.537432000 |
| H | 0.243256000  | -3.134521000 | 0.192168000  |

B-T1-R

|   |              |             |              |
|---|--------------|-------------|--------------|
| C | -1.163335000 | 0.241283000 | -1.724363000 |
|---|--------------|-------------|--------------|

|   |              |              |              |
|---|--------------|--------------|--------------|
| C | -2.570230000 | 0.212061000  | -1.478708000 |
| C | -2.819296000 | 0.336345000  | -0.035493000 |
| C | -1.561003000 | 0.513361000  | 0.621793000  |
| N | -0.567833000 | 0.417554000  | -0.422737000 |
| H | -3.318038000 | 0.199649000  | -2.259891000 |
| O | -0.520772000 | 0.189666000  | -2.774018000 |
| O | -1.301167000 | 0.663912000  | 1.816457000  |
| C | 0.817435000  | 0.560241000  | -0.204064000 |
| C | 1.292347000  | 1.773679000  | 0.361349000  |
| C | 1.701317000  | -0.488009000 | -0.565978000 |
| C | 2.664168000  | 1.902168000  | 0.580312000  |
| C | 3.064591000  | -0.304150000 | -0.319068000 |
| C | 3.546874000  | 0.871990000  | 0.252484000  |
| H | 3.046333000  | 2.830398000  | 0.995781000  |
| H | 3.754869000  | -1.104610000 | -0.571884000 |
| H | 4.611418000  | 0.991953000  | 0.432043000  |
| C | 1.246170000  | -1.827305000 | -1.101850000 |
| H | 2.019951000  | -2.201208000 | -1.782127000 |
| H | 0.335340000  | -1.734340000 | -1.694008000 |
| C | 1.032586000  | -2.888132000 | 0.012285000  |
| H | 0.892001000  | -3.857798000 | -0.485611000 |
| H | 1.942725000  | -2.964805000 | 0.619810000  |
| C | -4.119043000 | 0.216105000  | 0.656287000  |
| H | -3.997403000 | 0.374405000  | 1.730565000  |
| H | -4.565544000 | -0.776121000 | 0.491302000  |
| H | -4.841741000 | 0.945160000  | 0.261793000  |
| C | -0.153100000 | -2.592379000 | 0.885975000  |
| H | -1.120412000 | -2.581671000 | 0.380748000  |
| C | -0.095015000 | -2.316398000 | 2.189580000  |
| H | 0.852665000  | -2.300858000 | 2.725295000  |
| H | -0.984718000 | -2.078894000 | 2.765115000  |
| C | 0.371350000  | 2.928004000  | 0.665135000  |
| H | 0.941103000  | 3.854519000  | 0.776445000  |
| H | -0.184990000 | 2.746242000  | 1.590213000  |
| H | -0.368119000 | 3.073281000  | -0.130007000 |

C-T1-R

|   |              |              |              |
|---|--------------|--------------|--------------|
| C | 1.412545000  | -0.603057000 | -1.102234000 |
| C | 2.716824000  | -0.699647000 | -0.516173000 |
| C | 2.562392000  | -0.644780000 | 0.949948000  |
| C | 1.172259000  | -0.575729000 | 1.275737000  |
| N | 0.498770000  | -0.538224000 | 0.007199000  |
| O | 1.065029000  | -0.616642000 | -2.284631000 |
| O | 0.599797000  | -0.499071000 | 2.364492000  |
| C | -0.907794000 | -0.500875000 | -0.133840000 |
| C | -1.664476000 | -1.587305000 | 0.372647000  |

|   |              |              |              |
|---|--------------|--------------|--------------|
| C | -1.520408000 | 0.597956000  | -0.782306000 |
| C | -3.051684000 | -1.545776000 | 0.221751000  |
| C | -2.913093000 | 0.588930000  | -0.902739000 |
| C | -3.675590000 | -0.467695000 | -0.407030000 |
| H | -3.646842000 | -2.377239000 | 0.588865000  |
| H | -3.403437000 | 1.431265000  | -1.383629000 |
| H | -4.756318000 | -0.454847000 | -0.515488000 |
| C | -0.758762000 | 1.821449000  | -1.244873000 |
| H | -1.260136000 | 2.222858000  | -2.133123000 |
| H | 0.257676000  | 1.567772000  | -1.547521000 |
| C | -0.705945000 | 2.945549000  | -0.173697000 |
| H | -0.240710000 | 3.829324000  | -0.627187000 |
| H | -1.738188000 | 3.219460000  | 0.087180000  |
| C | 0.044252000  | 2.547536000  | 1.066663000  |
| H | -0.383497000 | 1.731040000  | 1.647074000  |
| C | 1.194137000  | 3.091209000  | 1.470928000  |
| H | 1.670606000  | 3.900777000  | 0.920137000  |
| H | 1.703560000  | 2.743316000  | 2.366185000  |
| C | -1.005236000 | -2.780970000 | 1.014777000  |
| H | -1.704249000 | -3.618792000 | 1.082256000  |
| H | -0.659962000 | -2.533122000 | 2.024259000  |
| H | -0.127883000 | -3.110054000 | 0.447038000  |
| C | 3.967725000  | -0.914976000 | -1.268972000 |
| H | 4.708818000  | -0.140723000 | -1.021298000 |
| H | 4.431429000  | -1.876135000 | -1.000020000 |
| H | 3.776912000  | -0.901026000 | -2.344653000 |
| H | 3.359338000  | -0.571520000 | 1.677126000  |

#### D-T1-R

|   |              |              |              |
|---|--------------|--------------|--------------|
| C | 1.587816000  | -0.300263000 | -1.069845000 |
| C | 2.861565000  | -0.278019000 | -0.418313000 |
| C | 2.637358000  | -0.377878000 | 1.029893000  |
| C | 1.241959000  | -0.526238000 | 1.289582000  |
| N | 0.617376000  | -0.437045000 | -0.011852000 |
| O | 1.302986000  | -0.270017000 | -2.269616000 |
| O | 0.624881000  | -0.650642000 | 2.346975000  |
| C | -0.771006000 | -0.548839000 | -0.224604000 |
| C | -1.426262000 | -1.736937000 | 0.197232000  |
| C | -1.476570000 | 0.501777000  | -0.866722000 |
| C | -2.802591000 | -1.835787000 | -0.008203000 |
| C | -2.854431000 | 0.347296000  | -1.041583000 |
| C | -3.517555000 | -0.801908000 | -0.614058000 |
| H | -3.315832000 | -2.744693000 | 0.293010000  |
| H | -3.414914000 | 1.149831000  | -1.513662000 |
| H | -4.588978000 | -0.898454000 | -0.764367000 |
| C | -0.847763000 | 1.815245000  | -1.276609000 |



|   |              |              |              |
|---|--------------|--------------|--------------|
| H | -1.389021000 | 2.189897000  | -2.152855000 |
| H | 0.188546000  | 1.683333000  | -1.589119000 |
| C | -0.921312000 | 2.902023000  | -0.168585000 |
| H | -0.615222000 | 3.852688000  | -0.627277000 |
| H | -1.962584000 | 3.019479000  | 0.156103000  |
| C | -0.039989000 | 2.603302000  | 1.010068000  |
| H | 1.030151000  | 2.557824000  | 0.800889000  |
| C | -0.473656000 | 2.363910000  | 2.248554000  |
| H | -1.534566000 | 2.382536000  | 2.492089000  |
| H | 0.208769000  | 2.122389000  | 3.057752000  |
| C | -0.670415000 | -2.899093000 | 0.789111000  |
| H | -1.267327000 | -3.813464000 | 0.733333000  |
| H | -0.422910000 | -2.706007000 | 1.837889000  |
| H | 0.274976000  | -3.073453000 | 0.263864000  |
| C | 4.162649000  | -0.265711000 | -1.118052000 |
| H | 4.791736000  | 0.560813000  | -0.757043000 |
| H | 4.728839000  | -1.188599000 | -0.920497000 |
| H | 4.017664000  | -0.164479000 | -2.196307000 |
| H | 3.387319000  | -0.282347000 | 1.803105000  |

#### A-T1-P

|   |              |              |              |
|---|--------------|--------------|--------------|
| C | -0.671441000 | 1.454613000  | -0.684663000 |
| C | -2.151237000 | 1.139378000  | -0.619359000 |
| C | -2.290040000 | 0.148027000  | 0.564177000  |
| C | -0.947197000 | 0.121911000  | 1.226080000  |
| N | -0.032338000 | 0.774864000  | 0.375510000  |
| H | -2.771646000 | 2.037674000  | -0.644637000 |
| O | -0.084757000 | 2.086496000  | -1.540319000 |
| O | -0.620313000 | -0.470160000 | 2.238133000  |
| C | 1.267997000  | 0.215015000  | 0.244757000  |
| C | 2.418896000  | 0.931666000  | 0.190607000  |
| C | 1.232324000  | -1.251740000 | -0.055437000 |
| C | 3.655734000  | 0.194169000  | 0.005895000  |
| C | 2.527424000  | -1.962823000 | 0.093675000  |
| C | 3.680504000  | -1.251303000 | 0.042594000  |
| H | 4.588725000  | 0.746782000  | -0.039278000 |
| H | 2.530059000  | -3.044919000 | 0.202420000  |
| H | 4.644577000  | -1.752343000 | 0.093625000  |
| C | 0.216593000  | -1.739575000 | -1.068651000 |
| H | 0.616388000  | -2.655224000 | -1.518775000 |
| H | 0.136628000  | -1.013988000 | -1.894730000 |
| C | -1.226453000 | -2.104951000 | -0.564780000 |
| H | -1.595806000 | -2.868582000 | -1.260260000 |
| H | -1.142700000 | -2.594859000 | 0.412667000  |
| C | -2.356210000 | -1.050973000 | -0.487597000 |
| H | -3.282708000 | -1.612171000 | -0.328582000 |

|   |              |              |              |
|---|--------------|--------------|--------------|
| C | -2.491831000 | -0.000236000 | -1.628202000 |
| H | -1.819901000 | -0.096395000 | -2.485382000 |
| H | -3.515949000 | 0.082286000  | -1.999522000 |
| C | -3.469707000 | 0.254695000  | 1.511566000  |
| H | -3.444587000 | 1.199661000  | 2.065319000  |
| H | -3.444315000 | -0.568513000 | 2.233076000  |
| H | -4.414216000 | 0.203902000  | 0.960443000  |
| C | 2.480935000  | 2.425667000  | 0.361639000  |
| H | 3.239924000  | 2.693765000  | 1.107084000  |
| H | 1.519062000  | 2.838496000  | 0.672427000  |
| H | 2.765658000  | 2.908454000  | -0.580799000 |

B-T1-P

|   |              |              |              |
|---|--------------|--------------|--------------|
| C | 0.786217000  | -0.186942000 | 1.457460000  |
| C | 2.123851000  | -0.511319000 | 0.896029000  |
| C | 2.418096000  | 0.564691000  | -0.181006000 |
| C | 1.005264000  | 1.036138000  | -0.539162000 |
| N | 0.102425000  | 0.523623000  | 0.427773000  |
| H | 2.896173000  | -0.699037000 | 1.641064000  |
| O | 0.267262000  | -0.490905000 | 2.514987000  |
| O | 0.680220000  | 1.696134000  | -1.504901000 |
| C | -1.249450000 | 0.236213000  | 0.193565000  |
| C | -2.248822000 | 1.262676000  | 0.041348000  |
| C | -1.579672000 | -1.254834000 | -0.009872000 |
| C | -3.521152000 | 0.876952000  | -0.248325000 |
| C | -2.880591000 | -1.554829000 | -0.333141000 |
| C | -3.872819000 | -0.559852000 | -0.444580000 |
| H | -4.310851000 | 1.617654000  | -0.332042000 |
| H | -3.152059000 | -2.591618000 | -0.521408000 |
| H | -4.896537000 | -0.823133000 | -0.685023000 |
| C | -0.484410000 | -2.297356000 | 0.008926000  |
| H | -0.935940000 | -3.244685000 | -0.301709000 |
| H | -0.122975000 | -2.466487000 | 1.031234000  |
| C | 0.736782000  | -1.988802000 | -0.922266000 |
| H | 0.946791000  | -2.876143000 | -1.529762000 |
| H | 0.432523000  | -1.223268000 | -1.645069000 |
| C | 3.358308000  | 1.727973000  | 0.098898000  |
| H | 2.998719000  | 2.337339000  | 0.935967000  |
| H | 3.434742000  | 2.369940000  | -0.785284000 |
| H | 4.357179000  | 1.355131000  | 0.346502000  |
| C | 2.094524000  | -1.591898000 | -0.276869000 |
| H | 2.646447000  | -2.493208000 | -0.000334000 |
| C | 2.869991000  | -0.563614000 | -1.152970000 |
| H | 2.578283000  | -0.472140000 | -2.203855000 |
| H | 3.954640000  | -0.694204000 | -1.091159000 |
| C | -1.864931000 | 2.702065000  | 0.262018000  |

|   |              |             |              |
|---|--------------|-------------|--------------|
| H | -2.739483000 | 3.355488000 | 0.197068000  |
| H | -1.127089000 | 3.022839000 | -0.480865000 |
| H | -1.404510000 | 2.834773000 | 1.249250000  |

C-T1-P

|   |              |              |              |
|---|--------------|--------------|--------------|
| C | -0.974468000 | 1.183475000  | -0.403915000 |
| C | -2.375409000 | 0.632093000  | -0.175538000 |
| C | -2.168205000 | -0.408840000 | 0.954157000  |
| C | -0.785165000 | -0.210801000 | 1.473424000  |
| N | -0.104950000 | 0.608154000  | 0.544982000  |
| O | -0.619445000 | 1.928040000  | -1.296159000 |
| O | -0.237501000 | -0.751990000 | 2.415399000  |
| C | 1.244987000  | 0.283071000  | 0.239655000  |
| C | 2.241253000  | 1.188856000  | 0.069663000  |
| C | 1.420425000  | -1.162401000 | -0.110488000 |
| C | 3.551259000  | 0.678794000  | -0.290776000 |
| C | 2.825868000  | -1.641543000 | -0.141559000 |
| C | 3.825660000  | -0.740412000 | -0.307969000 |
| H | 4.363681000  | 1.384805000  | -0.430185000 |
| H | 3.026187000  | -2.708077000 | -0.069878000 |
| H | 4.859605000  | -1.067747000 | -0.391442000 |
| C | 0.389368000  | -1.794908000 | -1.023968000 |
| H | 0.882263000  | -2.617465000 | -1.554446000 |
| H | 0.092114000  | -1.075160000 | -1.804092000 |
| C | -0.902616000 | -2.414938000 | -0.378951000 |
| H | -1.218626000 | -3.212278000 | -1.062673000 |
| H | -0.623524000 | -2.907920000 | 0.559981000  |
| C | -2.175247000 | -1.570842000 | -0.129594000 |
| H | -2.972095000 | -2.282381000 | 0.103514000  |
| C | -2.615702000 | -0.528115000 | -1.197798000 |
| H | -2.038927000 | -0.479325000 | -2.125852000 |
| H | -3.675232000 | -0.615872000 | -1.454432000 |
| C | 2.068098000  | 2.668708000  | 0.282823000  |
| H | 2.868634000  | 3.059436000  | 0.923036000  |
| H | 1.104267000  | 2.902007000  | 0.740192000  |
| H | 2.124206000  | 3.203228000  | -0.672871000 |
| C | -3.432494000 | 1.717497000  | -0.054934000 |
| H | -3.434185000 | 2.341308000  | -0.955075000 |
| H | -4.424988000 | 1.270658000  | 0.061268000  |
| H | -3.239515000 | 2.361611000  | 0.810367000  |
| H | -2.929315000 | -0.500457000 | 1.728395000  |

D-T1-P

|   |             |             |              |
|---|-------------|-------------|--------------|
| C | 0.914966000 | 0.065624000 | 1.247850000  |
| C | 2.243925000 | 0.026936000 | 0.569404000  |
| C | 2.200941000 | 1.166542000 | -0.481437000 |

|   |              |              |              |
|---|--------------|--------------|--------------|
| C | 0.708047000  | 1.403540000  | -0.673598000 |
| N | 0.014868000  | 0.681200000  | 0.334978000  |
| O | 0.572149000  | -0.385557000 | 2.325366000  |
| O | 0.167895000  | 2.027928000  | -1.563381000 |
| C | -1.276827000 | 0.152947000  | 0.203525000  |
| C | -2.459929000 | 0.975580000  | 0.209312000  |
| C | -1.346590000 | -1.366508000 | -0.042033000 |
| C | -3.663284000 | 0.364270000  | 0.036730000  |
| C | -2.598027000 | -1.897992000 | -0.238263000 |
| C | -3.763226000 | -1.106475000 | -0.192281000 |
| H | -4.580574000 | 0.944231000  | 0.074736000  |
| H | -2.692767000 | -2.961091000 | -0.450230000 |
| H | -4.741192000 | -1.551738000 | -0.335358000 |
| C | -0.083369000 | -2.183820000 | -0.195990000 |
| H | -0.384448000 | -3.183017000 | -0.525758000 |
| H | 0.407063000  | -2.331499000 | 0.774550000  |
| C | 0.958315000  | -1.606338000 | -1.212053000 |
| H | 1.263247000  | -2.406550000 | -1.895731000 |
| H | 0.448884000  | -0.875531000 | -1.850171000 |
| C | 2.278900000  | -0.996845000 | -0.664683000 |
| H | 3.005799000  | -1.795029000 | -0.487941000 |
| C | 2.767470000  | 0.190903000  | -1.548008000 |
| H | 2.362450000  | 0.263860000  | -2.561387000 |
| H | 3.857126000  | 0.264500000  | -1.591000000 |
| C | -2.328846000 | 2.454159000  | 0.462824000  |
| H | -3.311723000 | 2.929278000  | 0.527976000  |
| H | -1.755307000 | 2.933343000  | -0.337353000 |
| H | -1.789522000 | 2.641678000  | 1.399969000  |
| C | 3.436684000  | -0.072220000 | 1.500150000  |
| H | 3.472736000  | 0.785886000  | 2.179930000  |
| H | 3.367876000  | -0.984159000 | 2.101900000  |
| H | 4.372939000  | -0.102425000 | 0.934082000  |
| H | 2.738083000  | 2.099070000  | -0.287638000 |

#### A-DR1-T1

|   |              |              |              |
|---|--------------|--------------|--------------|
| C | -0.947424000 | 0.039866000  | 1.423357000  |
| C | -2.378343000 | 0.019079000  | 0.921049000  |
| C | -2.355188000 | -1.054446000 | -0.112351000 |
| C | -0.979246000 | -1.232469000 | -0.529214000 |
| N | -0.171461000 | -0.520687000 | 0.410543000  |
| H | -3.111016000 | -0.101904000 | 1.722306000  |
| O | -0.520904000 | 0.552782000  | 2.443113000  |
| O | -0.537501000 | -1.850506000 | -1.492640000 |
| C | 1.203041000  | -0.205733000 | 0.179789000  |
| C | 2.146054000  | -1.248405000 | 0.167244000  |
| C | 1.554764000  | 1.138623000  | -0.071083000 |

|   |              |              |              |
|---|--------------|--------------|--------------|
| C | 3.472400000  | -0.932428000 | -0.148800000 |
| C | 2.896849000  | 1.401073000  | -0.377994000 |
| C | 3.844963000  | 0.380100000  | -0.430437000 |
| H | 4.215580000  | -1.725282000 | -0.164914000 |
| H | 3.199554000  | 2.425996000  | -0.576125000 |
| H | 4.877847000  | 0.611878000  | -0.675416000 |
| C | 0.591515000  | 2.313193000  | 0.033133000  |
| H | 1.200720000  | 3.222416000  | -0.001779000 |
| H | 0.117451000  | 2.317230000  | 1.018818000  |
| C | -0.503248000 | 2.481912000  | -1.065241000 |
| H | -0.811854000 | 3.540798000  | -0.998945000 |
| H | -0.036210000 | 2.368734000  | -2.050248000 |
| C | -1.734567000 | 1.630608000  | -1.000712000 |
| H | -2.064640000 | 1.147019000  | -1.916334000 |
| C | -2.588839000 | 1.438540000  | 0.215017000  |
| H | -2.404179000 | 2.207716000  | 0.974198000  |
| H | -3.650747000 | 1.484796000  | -0.056335000 |
| C | -3.519832000 | -1.659460000 | -0.795703000 |
| H | -4.178502000 | -2.167769000 | -0.078663000 |
| H | -3.193141000 | -2.377009000 | -1.552928000 |
| H | -4.132037000 | -0.887970000 | -1.286652000 |
| C | 1.749514000  | -2.666743000 | 0.496299000  |
| H | 2.631068000  | -3.274999000 | 0.718230000  |
| H | 1.213501000  | -3.124517000 | -0.341549000 |
| H | 1.079599000  | -2.700387000 | 1.362632000  |

#### A-DR2-T1

|   |              |              |              |
|---|--------------|--------------|--------------|
| C | -0.582761000 | -0.855315000 | 1.499989000  |
| C | -1.996060000 | -0.818446000 | 1.207747000  |
| C | -2.206649000 | -0.575028000 | -0.244612000 |
| C | -0.833329000 | -0.896578000 | -0.820338000 |
| N | 0.082302000  | -0.832967000 | 0.240998000  |
| H | -2.767380000 | -0.867568000 | 1.964311000  |
| O | -0.002343000 | -0.856009000 | 2.579769000  |
| O | -0.539464000 | -1.057475000 | -1.988886000 |
| C | 1.337858000  | -0.160553000 | 0.075489000  |
| C | 2.513710000  | -0.882314000 | -0.146498000 |
| C | 1.289840000  | 1.245497000  | 0.125556000  |
| C | 3.695950000  | -0.151686000 | -0.319806000 |
| C | 2.493349000  | 1.936600000  | -0.051079000 |
| C | 3.685381000  | 1.242878000  | -0.271331000 |
| H | 4.627996000  | -0.682449000 | -0.494849000 |
| H | 2.495041000  | 3.022968000  | -0.019056000 |
| H | 4.611748000  | 1.793950000  | -0.408330000 |
| C | -0.021207000 | 1.984381000  | 0.360032000  |
| H | 0.218533000  | 3.044003000  | 0.486254000  |

|   |              |              |              |
|---|--------------|--------------|--------------|
| H | -0.459059000 | 1.671712000  | 1.316051000  |
| C | -1.079681000 | 1.850152000  | -0.784221000 |
| H | -1.432610000 | 2.856643000  | -1.034809000 |
| H | -0.587969000 | 1.478274000  | -1.687756000 |
| C | -2.379735000 | 1.029300000  | -0.543737000 |
| H | -2.899223000 | 1.022638000  | -1.512795000 |
| C | -3.265071000 | 1.648007000  | 0.478738000  |
| H | -2.871830000 | 2.343862000  | 1.212776000  |
| H | -4.285430000 | 1.300300000  | 0.605186000  |
| C | -3.359060000 | -1.352225000 | -0.881010000 |
| H | -3.298693000 | -2.415262000 | -0.627836000 |
| H | -3.316568000 | -1.252147000 | -1.969698000 |
| H | -4.322584000 | -0.969433000 | -0.530516000 |
| C | 2.482324000  | -2.389285000 | -0.198420000 |
| H | 3.477155000  | -2.799002000 | -0.394411000 |
| H | 1.802600000  | -2.735804000 | -0.985152000 |
| H | 2.117460000  | -2.806355000 | 0.747585000  |

#### B-DR3-T1

|   |              |              |              |
|---|--------------|--------------|--------------|
| C | -0.800670000 | -0.355604000 | 1.593718000  |
| C | -2.215812000 | -0.489933000 | 1.321359000  |
| C | -2.448159000 | -0.509535000 | -0.148652000 |
| C | -1.039559000 | -0.746769000 | -0.694888000 |
| N | -0.144325000 | -0.498400000 | 0.340061000  |
| H | -2.977009000 | -0.460290000 | 2.089989000  |
| O | -0.217492000 | -0.146070000 | 2.651480000  |
| O | -0.734045000 | -1.002171000 | -1.846133000 |
| C | 1.238668000  | -0.205317000 | 0.115357000  |
| C | 2.137760000  | -1.262878000 | -0.079104000 |
| C | 1.621634000  | 1.146182000  | 0.051731000  |
| C | 3.474925000  | -0.941802000 | -0.339840000 |
| C | 2.969354000  | 1.421767000  | -0.209860000 |
| C | 3.887422000  | 0.389047000  | -0.404240000 |
| H | 4.193280000  | -1.742598000 | -0.493710000 |
| H | 3.298364000  | 2.456184000  | -0.263564000 |
| H | 4.928563000  | 0.623348000  | -0.608588000 |
| C | 0.630983000  | 2.274749000  | 0.271662000  |
| H | 1.185914000  | 3.217070000  | 0.243737000  |
| H | 0.221312000  | 2.194033000  | 1.285561000  |
| C | -0.561476000 | 2.351266000  | -0.754455000 |
| H | -0.575928000 | 3.376484000  | -1.156039000 |
| H | -0.358891000 | 1.700329000  | -1.612358000 |
| C | -3.474442000 | -1.522820000 | -0.658100000 |
| H | -3.226460000 | -2.534398000 | -0.321584000 |
| H | -3.490025000 | -1.516367000 | -1.752039000 |
| H | -4.474065000 | -1.270040000 | -0.291055000 |

|   |              |              |              |
|---|--------------|--------------|--------------|
| C | -1.905859000 | 2.043317000  | -0.165912000 |
| H | -2.187989000 | 2.581967000  | 0.736466000  |
| C | -2.818928000 | 0.965546000  | -0.651573000 |
| H | -2.821262000 | 0.905755000  | -1.748720000 |
| H | -3.846011000 | 1.152143000  | -0.319761000 |
| C | 1.662916000  | -2.693577000 | -0.015607000 |
| H | 2.499580000  | -3.390061000 | -0.118848000 |
| H | 0.943360000  | -2.898469000 | -0.816603000 |
| H | 1.157296000  | -2.902202000 | 0.934350000  |

#### B-DR4-T1

|   |              |              |              |
|---|--------------|--------------|--------------|
| C | 0.750502000  | 0.029912000  | 1.417462000  |
| C | 2.157420000  | 0.097838000  | 0.858752000  |
| C | 2.074913000  | 1.214153000  | -0.128960000 |
| C | 0.679977000  | 1.426957000  | -0.448589000 |
| N | -0.077500000 | 0.641204000  | 0.472089000  |
| H | 2.928155000  | 0.216919000  | 1.624703000  |
| O | 0.368683000  | -0.574299000 | 2.401852000  |
| O | 0.186091000  | 2.107727000  | -1.342878000 |
| C | -1.353678000 | 0.088312000  | 0.141589000  |
| C | -2.495751000 | 0.902280000  | 0.159255000  |
| C | -1.381069000 | -1.268892000 | -0.239462000 |
| C | -3.710794000 | 0.327220000  | -0.229217000 |
| C | -2.622453000 | -1.798844000 | -0.615865000 |
| C | -3.773802000 | -1.011521000 | -0.614966000 |
| H | -4.611295000 | 0.935608000  | -0.225073000 |
| H | -2.683437000 | -2.841091000 | -0.918400000 |
| H | -4.723882000 | -1.444266000 | -0.916122000 |
| C | -0.164697000 | -2.191248000 | -0.203471000 |
| H | -0.458226000 | -3.104802000 | -0.728891000 |
| H | 0.003606000  | -2.497537000 | 0.837378000  |
| C | 1.195457000  | -1.722369000 | -0.815870000 |
| H | 1.586761000  | -2.568891000 | -1.389761000 |
| H | 1.032994000  | -0.925939000 | -1.551122000 |
| C | 3.193816000  | 1.935724000  | -0.776378000 |
| H | 3.860685000  | 2.381133000  | -0.025457000 |
| H | 2.813990000  | 2.724034000  | -1.431833000 |
| H | 3.809928000  | 1.247537000  | -1.371604000 |
| C | 2.341617000  | -1.324382000 | 0.162859000  |
| H | 2.312600000  | -2.039523000 | 1.005638000  |
| C | 3.679202000  | -1.390706000 | -0.494239000 |
| H | 3.835660000  | -1.994174000 | -1.382514000 |
| H | 4.547071000  | -0.947850000 | -0.015663000 |
| C | -2.407370000 | 2.344364000  | 0.593150000  |
| H | -3.402499000 | 2.790452000  | 0.676392000  |
| H | -1.820873000 | 2.927094000  | -0.124702000 |

|   |              |             |             |
|---|--------------|-------------|-------------|
| H | -1.906681000 | 2.432659000 | 1.564305000 |
|---|--------------|-------------|-------------|

C-DR5-T1

|   |              |              |              |
|---|--------------|--------------|--------------|
| C | 1.135056000  | -0.347275000 | -1.020610000 |
| C | 2.471259000  | -0.420344000 | -0.287868000 |
| C | 2.130393000  | -1.275756000 | 0.880709000  |
| C | 0.697751000  | -1.250791000 | 1.082903000  |
| N | 0.144963000  | -0.647619000 | -0.087442000 |
| O | 0.943594000  | 0.012217000  | -2.168639000 |
| O | 0.035095000  | -1.636687000 | 2.038570000  |
| C | -1.204282000 | -0.183729000 | -0.167396000 |
| C | -2.246525000 | -1.126890000 | -0.173066000 |
| C | -1.438570000 | 1.207907000  | -0.200794000 |
| C | -3.562915000 | -0.651621000 | -0.171164000 |
| C | -2.774618000 | 1.630641000  | -0.202781000 |
| C | -3.827025000 | 0.716323000  | -0.175828000 |
| H | -4.382924000 | -1.364896000 | -0.174359000 |
| H | -2.988639000 | 2.695886000  | -0.228785000 |
| H | -4.853685000 | 1.071991000  | -0.174079000 |
| C | -0.341771000 | 2.259360000  | -0.294680000 |
| H | -0.836053000 | 3.212552000  | -0.509070000 |
| H | 0.292360000  | 2.057074000  | -1.162886000 |
| C | 0.558955000  | 2.504917000  | 0.954637000  |
| H | 0.995308000  | 3.508363000  | 0.800791000  |
| H | -0.080402000 | 2.590823000  | 1.840664000  |
| C | 1.675168000  | 1.547197000  | 1.240812000  |
| H | 1.798261000  | 1.204429000  | 2.264621000  |
| C | 2.689709000  | 1.083820000  | 0.243751000  |
| H | 2.718466000  | 1.727594000  | -0.644305000 |
| H | 3.691468000  | 1.087865000  | 0.691777000  |
| C | -1.961909000 | -2.608707000 | -0.193910000 |
| H | -2.854201000 | -3.171480000 | -0.482619000 |
| H | -1.636863000 | -2.956332000 | 0.792362000  |
| H | -1.159129000 | -2.848852000 | -0.899839000 |
| C | 3.638450000  | -0.863210000 | -1.164104000 |
| H | 4.574531000  | -0.833214000 | -0.597814000 |
| H | 3.487164000  | -1.883022000 | -1.531343000 |
| H | 3.729547000  | -0.196525000 | -2.026760000 |
| H | 2.825784000  | -1.704214000 | 1.590623000  |

C-DR6-T1

|   |              |              |              |
|---|--------------|--------------|--------------|
| C | 0.780229000  | -1.241727000 | -0.849543000 |
| C | 2.138622000  | -1.063472000 | -0.383631000 |
| C | 2.095058000  | -0.339801000 | 0.922221000  |
| C | 0.657764000  | -0.534295000 | 1.370404000  |
| N | -0.076815000 | -0.838900000 | 0.213482000  |



|   |              |              |              |
|---|--------------|--------------|--------------|
| O | 0.379160000  | -1.629305000 | -1.942942000 |
| O | 0.177153000  | -0.327012000 | 2.467611000  |
| C | -1.323697000 | -0.180828000 | -0.046756000 |
| C | -2.539380000 | -0.824151000 | 0.200871000  |
| C | -1.230948000 | 1.136586000  | -0.535405000 |
| C | -3.714295000 | -0.109620000 | -0.064908000 |
| C | -2.428438000 | 1.813943000  | -0.789508000 |
| C | -3.658700000 | 1.194827000  | -0.557194000 |
| H | -4.676282000 | -0.581421000 | 0.116927000  |
| H | -2.395896000 | 2.832681000  | -1.166941000 |
| H | -4.579858000 | 1.734772000  | -0.758675000 |
| C | 0.119480000  | 1.803376000  | -0.765282000 |
| H | -0.067776000 | 2.757251000  | -1.266792000 |
| H | 0.713125000  | 1.215091000  | -1.475826000 |
| C | 0.952260000  | 2.078721000  | 0.530691000  |
| H | 1.273586000  | 3.125964000  | 0.511374000  |
| H | 0.296396000  | 1.988994000  | 1.401330000  |
| C | 2.255199000  | 1.269386000  | 0.796698000  |
| H | 2.567791000  | 1.555311000  | 1.811550000  |
| C | 3.343884000  | 1.615572000  | -0.158186000 |
| H | 3.131775000  | 2.117925000  | -1.096338000 |
| H | 4.361532000  | 1.286688000  | 0.027225000  |
| C | -2.557033000 | -2.231911000 | 0.741936000  |
| H | -3.581062000 | -2.590468000 | 0.879036000  |
| H | -2.039388000 | -2.281511000 | 1.706724000  |
| H | -2.037759000 | -2.918949000 | 0.063659000  |
| C | 3.332177000  | -1.552009000 | -1.111965000 |
| H | 3.943448000  | -2.200493000 | -0.468866000 |
| H | 3.031817000  | -2.111710000 | -2.001882000 |
| H | 3.979009000  | -0.720936000 | -1.422359000 |
| H | 2.833648000  | -0.693932000 | 1.645479000  |

#### D-DR7-T1

|   |              |              |              |
|---|--------------|--------------|--------------|
| C | 1.000127000  | -0.828439000 | -1.067795000 |
| C | 2.339785000  | -0.914033000 | -0.522729000 |
| C | 2.287846000  | -0.539808000 | 0.919538000  |
| C | 0.803388000  | -0.599947000 | 1.246120000  |
| N | 0.124677000  | -0.612508000 | 0.032275000  |
| O | 0.628863000  | -0.904045000 | -2.235464000 |
| O | 0.281383000  | -0.526415000 | 2.344866000  |
| C | -1.242907000 | -0.210618000 | -0.094986000 |
| C | -2.258940000 | -1.136016000 | 0.179415000  |
| C | -1.500099000 | 1.125896000  | -0.449182000 |
| C | -3.584321000 | -0.695826000 | 0.083841000  |
| C | -2.840015000 | 1.523040000  | -0.535007000 |
| C | -3.872388000 | 0.621969000  | -0.271074000 |

|   |              |              |              |
|---|--------------|--------------|--------------|
| H | -4.391970000 | -1.392899000 | 0.290780000  |
| H | -3.072894000 | 2.548831000  | -0.808292000 |
| H | -4.906060000 | 0.949631000  | -0.340584000 |
| C | -0.381339000 | 2.108748000  | -0.744587000 |
| H | -0.837868000 | 3.044400000  | -1.080700000 |
| H | 0.204741000  | 1.736624000  | -1.593093000 |
| C | 0.595352000  | 2.416824000  | 0.453669000  |
| H | 0.607098000  | 3.509716000  | 0.586448000  |
| H | 0.183932000  | 2.010884000  | 1.384384000  |
| C | 2.003136000  | 1.941439000  | 0.247272000  |
| H | 2.498719000  | 2.244360000  | -0.672973000 |
| C | 2.714872000  | 0.977439000  | 1.142927000  |
| H | 2.517770000  | 1.191432000  | 2.201866000  |
| H | 3.796687000  | 1.030876000  | 0.983737000  |
| C | -1.917632000 | -2.551867000 | 0.572768000  |
| H | -2.821901000 | -3.153122000 | 0.701906000  |
| H | -1.355985000 | -2.566510000 | 1.513808000  |
| H | -1.289788000 | -3.033961000 | -0.185657000 |
| C | 3.551935000  | -1.163183000 | -1.333802000 |
| H | 4.148786000  | -1.983289000 | -0.912584000 |
| H | 3.281889000  | -1.407769000 | -2.364453000 |
| H | 4.204949000  | -0.277591000 | -1.346408000 |
| H | 2.884395000  | -1.174104000 | 1.582348000  |

#### D-DR8-T1

|   |              |              |              |
|---|--------------|--------------|--------------|
| C | -0.888701000 | -0.395358000 | 1.090839000  |
| C | -2.223822000 | -0.467460000 | 0.368867000  |
| C | -1.904849000 | -1.351987000 | -0.785270000 |
| C | -0.472822000 | -1.409082000 | -0.969154000 |
| N | 0.096705000  | -0.766317000 | 0.170245000  |
| O | -0.681164000 | 0.030789000  | 2.211423000  |
| O | 0.180173000  | -1.856327000 | -1.905580000 |
| C | 1.356339000  | -0.092455000 | 0.126499000  |
| C | 2.549368000  | -0.828963000 | 0.149402000  |
| C | 1.320207000  | 1.312382000  | 0.019713000  |
| C | 3.752204000  | -0.119904000 | 0.055491000  |
| C | 2.550260000  | 1.976835000  | -0.066704000 |
| C | 3.753248000  | 1.270583000  | -0.052378000 |
| H | 4.691955000  | -0.665583000 | 0.071052000  |
| H | 2.562541000  | 3.060296000  | -0.152517000 |
| H | 4.695127000  | 1.807247000  | -0.126001000 |
| C | 0.031728000  | 2.130084000  | 0.048373000  |
| H | 0.305121000  | 3.146691000  | -0.249240000 |
| H | -0.302988000 | 2.213138000  | 1.090250000  |
| C | -1.177293000 | 1.695527000  | -0.841248000 |
| H | -1.560197000 | 2.604785000  | -1.315907000 |

|   |              |              |              |
|---|--------------|--------------|--------------|
| H | -0.836442000 | 1.063382000  | -1.669520000 |
| C | -2.421007000 | 1.056618000  | -0.152324000 |
| H | -2.628194000 | 1.618903000  | 0.769474000  |
| C | -3.603605000 | 1.124641000  | -1.059540000 |
| H | -3.470338000 | 1.074964000  | -2.135931000 |
| H | -4.613822000 | 1.089645000  | -0.667045000 |
| C | 2.527089000  | -2.331505000 | 0.279972000  |
| H | 3.534944000  | -2.726103000 | 0.437049000  |
| H | 2.108423000  | -2.790877000 | -0.621757000 |
| H | 1.898134000  | -2.644113000 | 1.121495000  |
| C | -3.384994000 | -0.908686000 | 1.258521000  |
| H | -3.474798000 | -0.234865000 | 2.115822000  |
| H | -4.326642000 | -0.900119000 | 0.703550000  |
| H | -3.215782000 | -1.922543000 | 1.634273000  |
| H | -2.616163000 | -1.793938000 | -1.469851000 |

#### A-DR1-T1-TS1

|   |              |              |              |
|---|--------------|--------------|--------------|
| C | -0.868306000 | -0.132168000 | 1.510554000  |
| C | -2.284626000 | -0.338198000 | 1.164506000  |
| C | -2.324379000 | -1.067917000 | -0.097702000 |
| C | -0.969829000 | -1.117299000 | -0.619659000 |
| N | -0.138285000 | -0.536089000 | 0.372836000  |
| H | -3.039632000 | -0.401297000 | 1.939859000  |
| O | -0.386759000 | 0.381327000  | 2.510363000  |
| O | -0.576633000 | -1.537286000 | -1.706147000 |
| C | 1.226792000  | -0.185467000 | 0.144139000  |
| C | 2.200873000  | -1.193701000 | 0.116962000  |
| C | 1.539562000  | 1.167693000  | -0.074538000 |
| C | 3.527192000  | -0.816732000 | -0.119861000 |
| C | 2.877574000  | 1.503482000  | -0.299920000 |
| C | 3.865827000  | 0.519867000  | -0.320610000 |
| H | 4.298473000  | -1.582314000 | -0.143876000 |
| H | 3.143317000  | 2.544143000  | -0.468741000 |
| H | 4.901533000  | 0.796043000  | -0.499697000 |
| C | 0.459121000  | 2.233197000  | -0.091153000 |
| H | 0.942012000  | 3.206914000  | -0.218541000 |
| H | -0.017597000 | 2.266658000  | 0.893187000  |
| C | -0.596390000 | 2.043500000  | -1.221625000 |
| H | -0.620994000 | 2.950306000  | -1.848402000 |
| H | -0.257975000 | 1.254419000  | -1.909985000 |
| C | -2.018664000 | 1.736938000  | -0.852054000 |
| H | -2.661981000 | 1.489448000  | -1.695068000 |
| C | -2.596520000 | 1.703279000  | 0.425449000  |
| H | -2.101569000 | 2.166929000  | 1.273805000  |
| H | -3.680418000 | 1.665994000  | 0.490394000  |
| C | -3.504044000 | -1.603398000 | -0.816935000 |

|   |              |              |              |
|---|--------------|--------------|--------------|
| H | -4.002662000 | -2.394036000 | -0.237278000 |
| H | -3.196037000 | -2.017355000 | -1.781026000 |
| H | -4.258491000 | -0.822010000 | -0.989314000 |
| C | 1.815729000  | -2.636387000 | 0.323785000  |
| H | 2.701316000  | -3.274830000 | 0.394572000  |
| H | 1.199096000  | -2.987334000 | -0.511533000 |
| H | 1.227262000  | -2.761515000 | 1.240028000  |

A-DR1-T1-TS2

|   |              |              |              |
|---|--------------|--------------|--------------|
| C | 0.750702000  | 0.232765000  | 1.473856000  |
| C | 2.232256000  | 0.244776000  | 1.088876000  |
| C | 2.220745000  | 0.631773000  | -0.383431000 |
| C | 0.855013000  | 1.042329000  | -0.745841000 |
| N | 0.020810000  | 0.652788000  | 0.380159000  |
| H | 2.853435000  | 0.824447000  | 1.779188000  |
| O | 0.282193000  | -0.196203000 | 2.519667000  |
| O | 0.656218000  | 2.133363000  | -1.410191000 |
| C | -1.294710000 | 0.145545000  | 0.122971000  |
| C | -2.388335000 | 1.020899000  | 0.120582000  |
| C | -1.411701000 | -1.224224000 | -0.182071000 |
| C | -3.647218000 | 0.492700000  | -0.192051000 |
| C | -2.688191000 | -1.711528000 | -0.485147000 |
| C | -3.796131000 | -0.861204000 | -0.491362000 |
| H | -4.512418000 | 1.150457000  | -0.201400000 |
| H | -2.814392000 | -2.765039000 | -0.721201000 |
| H | -4.778557000 | -1.256923000 | -0.734269000 |
| C | -0.216977000 | -2.167275000 | -0.143881000 |
| H | -0.592922000 | -3.170150000 | -0.366431000 |
| H | 0.153090000  | -2.221936000 | 0.885785000  |
| C | 0.961845000  | -1.883088000 | -1.126640000 |
| H | 1.237215000  | -2.834061000 | -1.603910000 |
| H | 0.606976000  | -1.242943000 | -1.948247000 |
| C | 2.260048000  | -1.285502000 | -0.626154000 |
| H | 3.068979000  | -1.414750000 | -1.345593000 |
| C | 2.675116000  | -1.228993000 | 0.838899000  |
| H | 2.186460000  | -1.948002000 | 1.503846000  |
| H | 3.758778000  | -1.320084000 | 0.945615000  |
| C | 3.416747000  | 1.272968000  | -1.018584000 |
| H | 3.560087000  | 2.280518000  | -0.608208000 |
| H | 3.287946000  | 1.360044000  | -2.100935000 |
| H | 4.325146000  | 0.699991000  | -0.806110000 |
| C | -2.194046000 | 2.481257000  | 0.446528000  |
| H | -3.125247000 | 3.041053000  | 0.319472000  |
| H | -1.423278000 | 2.921621000  | -0.195740000 |
| H | -1.855225000 | 2.609786000  | 1.481928000  |

A-DR2-T1-TS1

|   |              |              |              |
|---|--------------|--------------|--------------|
| C | -0.686213000 | -0.736223000 | 1.508654000  |
| C | -2.089640000 | -0.877737000 | 1.175542000  |
| C | -2.236368000 | -0.805867000 | -0.266950000 |
| C | -0.877177000 | -0.919337000 | -0.816390000 |
| N | 0.006040000  | -0.748358000 | 0.270640000  |
| H | -2.879512000 | -0.978051000 | 1.906640000  |
| O | -0.142635000 | -0.591367000 | 2.602363000  |
| O | -0.527648000 | -1.043376000 | -1.986136000 |
| C | 1.299441000  | -0.165996000 | 0.093420000  |
| C | 2.422734000  | -0.985242000 | -0.066980000 |
| C | 1.367102000  | 1.238118000  | 0.050690000  |
| C | 3.660011000  | -0.361298000 | -0.269176000 |
| C | 2.620805000  | 1.824047000  | -0.152812000 |
| C | 3.758321000  | 1.029855000  | -0.311130000 |
| H | 4.549232000  | -0.973004000 | -0.396937000 |
| H | 2.704708000  | 2.907128000  | -0.189106000 |
| H | 4.725730000  | 1.498413000  | -0.470112000 |
| C | 0.119275000  | 2.083955000  | 0.239766000  |
| H | 0.426431000  | 3.132220000  | 0.289955000  |
| H | -0.311372000 | 1.856919000  | 1.221443000  |
| C | -0.963847000 | 1.932511000  | -0.875458000 |
| H | -1.215623000 | 2.935656000  | -1.249001000 |
| H | -0.548254000 | 1.405051000  | -1.738427000 |
| C | -2.311952000 | 1.324928000  | -0.515813000 |
| H | -2.948420000 | 1.178050000  | -1.387357000 |
| C | -2.971210000 | 1.685366000  | 0.681274000  |
| H | -2.445511000 | 2.148737000  | 1.508751000  |
| H | -4.017115000 | 1.438918000  | 0.829956000  |
| C | -3.427111000 | -1.319260000 | -1.018860000 |
| H | -3.545927000 | -2.398662000 | -0.860019000 |
| H | -3.302880000 | -1.146102000 | -2.091608000 |
| H | -4.348107000 | -0.831170000 | -0.682659000 |
| C | 2.278802000  | -2.486342000 | -0.030850000 |
| H | 3.247403000  | -2.979519000 | -0.152211000 |
| H | 1.612363000  | -2.830054000 | -0.830398000 |
| H | 1.839003000  | -2.816947000 | 0.917233000  |

A-DR2-T1-TS2

|   |              |              |              |
|---|--------------|--------------|--------------|
| C | -0.763729000 | -0.901294000 | 1.326174000  |
| C | -2.150578000 | -0.704917000 | 1.010357000  |
| C | -2.222172000 | -0.415604000 | -0.476898000 |
| C | -0.813954000 | -0.657047000 | -0.999327000 |
| N | 0.011898000  | -0.777412000 | 0.105848000  |
| H | -2.910396000 | -1.295116000 | 1.522007000  |
| O | -0.313233000 | -1.582170000 | 2.333224000  |

|   |              |              |              |
|---|--------------|--------------|--------------|
| O | -0.447613000 | -0.605960000 | -2.161104000 |
| C | 1.304189000  | -0.157361000 | 0.060256000  |
| C | 2.446903000  | -0.945010000 | -0.122125000 |
| C | 1.345124000  | 1.245768000  | 0.155732000  |
| C | 3.680750000  | -0.290301000 | -0.220555000 |
| C | 2.597710000  | 1.860970000  | 0.046997000  |
| C | 3.753866000  | 1.100642000  | -0.143642000 |
| H | 4.585352000  | -0.876276000 | -0.360584000 |
| H | 2.668255000  | 2.943442000  | 0.117973000  |
| H | 4.717174000  | 1.596554000  | -0.226557000 |
| C | 0.104968000  | 2.074091000  | 0.462368000  |
| H | 0.436964000  | 3.112060000  | 0.560145000  |
| H | -0.248633000 | 1.788049000  | 1.460009000  |
| C | -1.097714000 | 2.075603000  | -0.536144000 |
| H | -1.495410000 | 3.097177000  | -0.537813000 |
| H | -0.738901000 | 1.891239000  | -1.554223000 |
| C | -2.338697000 | 1.185852000  | -0.265147000 |
| H | -3.138413000 | 1.528011000  | -0.934333000 |
| C | -2.789650000 | 1.098082000  | 1.175527000  |
| H | -2.267658000 | 1.648284000  | 1.953821000  |
| H | -3.860155000 | 0.992347000  | 1.346338000  |
| C | -3.337426000 | -1.028393000 | -1.300807000 |
| H | -3.288101000 | -2.121927000 | -1.263062000 |
| H | -3.245565000 | -0.713972000 | -2.345020000 |
| H | -4.316533000 | -0.715655000 | -0.924220000 |
| C | 2.323717000  | -2.445560000 | -0.210495000 |
| H | 3.307125000  | -2.924373000 | -0.206998000 |
| H | 1.801046000  | -2.741097000 | -1.128276000 |
| H | 1.737482000  | -2.834952000 | 0.629257000  |

#### B-DR3-T1-TS1

|   |              |              |              |
|---|--------------|--------------|--------------|
| C | -0.823320000 | -0.096738000 | 1.580609000  |
| C | -2.221643000 | -0.370357000 | 1.354314000  |
| C | -2.389191000 | -0.879483000 | -0.009091000 |
| C | -1.057542000 | -0.969416000 | -0.589715000 |
| N | -0.164964000 | -0.456913000 | 0.377435000  |
| H | -3.001037000 | -0.197323000 | 2.083567000  |
| O | -0.258316000 | 0.370373000  | 2.575082000  |
| O | -0.728087000 | -1.353206000 | -1.716152000 |
| C | 1.216749000  | -0.206952000 | 0.121994000  |
| C | 2.092044000  | -1.299229000 | -0.000648000 |
| C | 1.653640000  | 1.123860000  | -0.014981000 |
| C | 3.439670000  | -1.035206000 | -0.273033000 |
| C | 3.010368000  | 1.342725000  | -0.279861000 |
| C | 3.897684000  | 0.274160000  | -0.410236000 |
| H | 4.132162000  | -1.866929000 | -0.373069000 |

|   |              |              |              |
|---|--------------|--------------|--------------|
| H | 3.370136000  | 2.362220000  | -0.392166000 |
| H | 4.946780000  | 0.463473000  | -0.620499000 |
| C | 0.705767000  | 2.300534000  | 0.121164000  |
| H | 1.288401000  | 3.218418000  | 0.003691000  |
| H | 0.308396000  | 2.319532000  | 1.142170000  |
| C | -0.477066000 | 2.314807000  | -0.900595000 |
| H | -0.485040000 | 3.297686000  | -1.396737000 |
| H | -0.310996000 | 1.579508000  | -1.696149000 |
| C | -3.561353000 | -1.618688000 | -0.550660000 |
| H | -3.619543000 | -2.624270000 | -0.107249000 |
| H | -3.464563000 | -1.738308000 | -1.633686000 |
| H | -4.504206000 | -1.110053000 | -0.324382000 |
| C | -1.835881000 | 2.118219000  | -0.301794000 |
| H | -2.045426000 | 2.637103000  | 0.632234000  |
| C | -2.812424000 | 1.335237000  | -0.857545000 |
| H | -2.685073000 | 0.908488000  | -1.848505000 |
| H | -3.815958000 | 1.325267000  | -0.444949000 |
| C | 1.590896000  | -2.713511000 | 0.156304000  |
| H | 2.422267000  | -3.423565000 | 0.183053000  |
| H | 0.930656000  | -2.981329000 | -0.675928000 |
| H | 1.008632000  | -2.828633000 | 1.077773000  |

#### B-DR3-T1-TS2

|   |              |              |              |
|---|--------------|--------------|--------------|
| C | 0.824949000  | -0.064563000 | 1.485450000  |
| C | 2.132255000  | -0.392435000 | 0.991131000  |
| C | 2.409878000  | 0.566639000  | -0.160886000 |
| C | 0.980723000  | 0.998699000  | -0.560867000 |
| N | 0.099054000  | 0.573491000  | 0.432507000  |
| H | 2.926077000  | -0.660750000 | 1.683188000  |
| O | 0.299628000  | -0.373314000 | 2.628172000  |
| O | 0.654101000  | 1.554745000  | -1.596953000 |
| C | -1.256759000 | 0.206846000  | 0.143914000  |
| C | -2.233602000 | 1.207059000  | 0.022651000  |
| C | -1.545182000 | -1.166506000 | -0.010310000 |
| C | -3.543216000 | 0.807219000  | -0.265503000 |
| C | -2.871436000 | -1.517275000 | -0.288198000 |
| C | -3.862661000 | -0.543031000 | -0.413760000 |
| H | -4.317382000 | 1.563267000  | -0.367850000 |
| H | -3.125237000 | -2.566466000 | -0.416797000 |
| H | -4.886077000 | -0.837266000 | -0.629721000 |
| C | -0.474522000 | -2.243111000 | 0.089352000  |
| H | -0.960197000 | -3.203805000 | -0.104144000 |
| H | -0.091242000 | -2.302060000 | 1.113319000  |
| C | 0.721955000  | -2.079964000 | -0.919992000 |
| H | 0.839382000  | -3.042574000 | -1.435521000 |
| H | 0.419105000  | -1.367567000 | -1.695628000 |

|   |              |              |              |
|---|--------------|--------------|--------------|
| C | 3.354270000  | 1.747595000  | 0.014328000  |
| H | 3.006263000  | 2.409444000  | 0.815163000  |
| H | 3.407135000  | 2.327368000  | -0.913082000 |
| H | 4.360248000  | 1.397126000  | 0.266225000  |
| C | 2.094128000  | -1.698592000 | -0.383765000 |
| H | 2.680427000  | -2.539005000 | -0.011940000 |
| C | 2.844817000  | -0.589964000 | -1.117606000 |
| H | 2.550724000  | -0.426744000 | -2.161502000 |
| H | 3.930190000  | -0.714656000 | -1.056320000 |
| C | -1.869440000 | 2.660446000  | 0.194417000  |
| H | -2.761007000 | 3.293798000  | 0.178724000  |
| H | -1.195239000 | 2.985065000  | -0.605673000 |
| H | -1.343324000 | 2.824561000  | 1.142114000  |

#### B-DR4-T1-TS1

|   |              |              |              |
|---|--------------|--------------|--------------|
| C | 0.789848000  | 0.001548000  | 1.469443000  |
| C | 2.168531000  | 0.228044000  | 1.086267000  |
| C | 2.180517000  | 1.170922000  | -0.026576000 |
| C | 0.812593000  | 1.314210000  | -0.480186000 |
| N | 0.012237000  | 0.575362000  | 0.431671000  |
| H | 2.993827000  | 0.066199000  | 1.767222000  |
| O | 0.326653000  | -0.626702000 | 2.423366000  |
| O | 0.380345000  | 1.912598000  | -1.471315000 |
| C | -1.307208000 | 0.127664000  | 0.130936000  |
| C | -2.365256000 | 1.050777000  | 0.109487000  |
| C | -1.489675000 | -1.238593000 | -0.165687000 |
| C | -3.639879000 | 0.580517000  | -0.227716000 |
| C | -2.782944000 | -1.664375000 | -0.490282000 |
| C | -3.849208000 | -0.765356000 | -0.524891000 |
| H | -4.472722000 | 1.278546000  | -0.250689000 |
| H | -2.951874000 | -2.711745000 | -0.727072000 |
| H | -4.844326000 | -1.115646000 | -0.785121000 |
| C | -0.355996000 | -2.251573000 | -0.110293000 |
| H | -0.742306000 | -3.195710000 | -0.504794000 |
| H | -0.113966000 | -2.443381000 | 0.941033000  |
| C | 0.947890000  | -1.895404000 | -0.882369000 |
| H | 1.162627000  | -2.712984000 | -1.584040000 |
| H | 0.802164000  | -1.017711000 | -1.521653000 |
| C | 3.326899000  | 1.927348000  | -0.585680000 |
| H | 3.555064000  | 2.802807000  | 0.042919000  |
| H | 3.086659000  | 2.294264000  | -1.588102000 |
| H | 4.235272000  | 1.318142000  | -0.627810000 |
| C | 2.224073000  | -1.734125000 | -0.077257000 |
| H | 2.264093000  | -2.239618000 | 0.885779000  |
| C | 3.418895000  | -1.459762000 | -0.731754000 |
| H | 3.426639000  | -1.142814000 | -1.770537000 |



|   |              |              |              |
|---|--------------|--------------|--------------|
| H | 4.366710000  | -1.480522000 | -0.204181000 |
| C | -2.132127000 | 2.501385000  | 0.451643000  |
| H | -3.079508000 | 3.041475000  | 0.535703000  |
| H | -1.519879000 | 2.984083000  | -0.317539000 |
| H | -1.591835000 | 2.600565000  | 1.400262000  |

B-DR4-T1-TS2

|   |              |              |              |
|---|--------------|--------------|--------------|
| C | 0.711189000  | -0.151819000 | 1.422684000  |
| C | 2.113004000  | -0.388283000 | 0.917783000  |
| C | 2.359864000  | 0.646317000  | -0.156455000 |
| C | 1.026590000  | 1.070292000  | -0.580008000 |
| N | 0.055230000  | 0.543261000  | 0.418256000  |
| H | 2.870493000  | -0.497155000 | 1.693783000  |
| O | 0.204210000  | -0.586525000 | 2.442648000  |
| O | 0.797025000  | 2.169199000  | -1.212673000 |
| C | -1.289682000 | 0.182345000  | 0.102975000  |
| C | -2.283201000 | 1.176431000  | 0.041714000  |
| C | -1.573384000 | -1.185061000 | -0.126794000 |
| C | -3.587345000 | 0.783853000  | -0.277912000 |
| C | -2.894825000 | -1.529838000 | -0.429481000 |
| C | -3.892514000 | -0.556981000 | -0.510876000 |
| H | -4.369557000 | 1.536413000  | -0.331873000 |
| H | -3.142162000 | -2.572011000 | -0.614418000 |
| H | -4.910797000 | -0.846478000 | -0.755754000 |
| C | -0.510595000 | -2.276185000 | -0.047313000 |
| H | -0.960064000 | -3.192207000 | -0.442219000 |
| H | -0.279948000 | -2.491938000 | 1.002670000  |
| C | 0.792173000  | -1.992884000 | -0.844307000 |
| H | 1.055423000  | -2.888539000 | -1.419720000 |
| H | 0.573085000  | -1.224029000 | -1.592382000 |
| C | 3.470565000  | 1.660748000  | -0.094736000 |
| H | 3.239447000  | 2.403851000  | 0.681414000  |
| H | 3.557914000  | 2.192422000  | -1.047189000 |
| H | 4.428547000  | 1.197726000  | 0.155701000  |
| C | 2.108083000  | -1.610107000 | -0.116990000 |
| H | 2.546517000  | -2.489361000 | 0.371066000  |
| C | 3.017908000  | -0.901029000 | -1.099686000 |
| H | 2.767045000  | -0.893690000 | -2.158852000 |
| H | 4.085156000  | -0.902658000 | -0.885331000 |
| C | -1.950375000 | 2.614679000  | 0.346254000  |
| H | -2.839685000 | 3.247307000  | 0.272610000  |
| H | -1.182819000 | 2.991065000  | -0.337300000 |
| H | -1.539808000 | 2.710183000  | 1.359090000  |

C-DR5-T1-TS1

|   |             |              |              |
|---|-------------|--------------|--------------|
| C | 1.084316000 | -0.628389000 | -1.009705000 |
|---|-------------|--------------|--------------|

|   |              |              |              |
|---|--------------|--------------|--------------|
| C | 2.393170000  | -0.805084000 | -0.384212000 |
| C | 2.151111000  | -1.023701000 | 1.037576000  |
| C | 0.739029000  | -0.877101000 | 1.297845000  |
| N | 0.140856000  | -0.626515000 | 0.036802000  |
| O | 0.815624000  | -0.441539000 | -2.198422000 |
| O | 0.117555000  | -0.913700000 | 2.364658000  |
| C | -1.213580000 | -0.201082000 | -0.116338000 |
| C | -2.243870000 | -1.148774000 | -0.021641000 |
| C | -1.464568000 | 1.165312000  | -0.336007000 |
| C | -3.562432000 | -0.700765000 | -0.166412000 |
| C | -2.795348000 | 1.571473000  | -0.482141000 |
| C | -3.837038000 | 0.646500000  | -0.399554000 |
| H | -4.376641000 | -1.417470000 | -0.097373000 |
| H | -3.014285000 | 2.622322000  | -0.652980000 |
| H | -4.865636000 | 0.978259000  | -0.511972000 |
| C | -0.332598000 | 2.174327000  | -0.396600000 |
| H | -0.758007000 | 3.151310000  | -0.642261000 |
| H | 0.322499000  | 1.916958000  | -1.234552000 |
| C | 0.478327000  | 2.296000000  | 0.926548000  |
| H | 0.465032000  | 3.343426000  | 1.266983000  |
| H | -0.037336000 | 1.750037000  | 1.729881000  |
| C | 1.915418000  | 1.865313000  | 0.943054000  |
| H | 2.371275000  | 1.851837000  | 1.931522000  |
| C | 2.707392000  | 1.501700000  | -0.124859000 |
| H | 2.396037000  | 1.658923000  | -1.152269000 |
| H | 3.769914000  | 1.349198000  | 0.032004000  |
| C | -1.927355000 | -2.600557000 | 0.238536000  |
| H | -2.831212000 | -3.214730000 | 0.194860000  |
| H | -1.473089000 | -2.721731000 | 1.228697000  |
| H | -1.210210000 | -2.988473000 | -0.494077000 |
| C | 3.601841000  | -1.209514000 | -1.156382000 |
| H | 4.525027000  | -0.913921000 | -0.647983000 |
| H | 3.631214000  | -2.302036000 | -1.280881000 |
| H | 3.580150000  | -0.762611000 | -2.154664000 |
| H | 2.890949000  | -1.227724000 | 1.799316000  |

#### C-DR5-T1-TS2

|   |              |              |              |
|---|--------------|--------------|--------------|
| C | 0.985220000  | -0.507873000 | -1.032293000 |
| C | 2.388319000  | -0.398971000 | -0.406164000 |
| C | 2.078139000  | -0.409809000 | 1.082597000  |
| C | 0.696316000  | -0.791862000 | 1.283814000  |
| N | 0.064462000  | -0.695782000 | -0.018737000 |
| O | 0.719817000  | -0.356386000 | -2.216355000 |
| O | 0.363739000  | -1.681561000 | 2.164471000  |
| C | -1.269921000 | -0.179107000 | -0.115484000 |
| C | -2.357877000 | -1.061064000 | -0.088611000 |

|   |              |              |              |
|---|--------------|--------------|--------------|
| C | -1.420854000 | 1.220214000  | -0.170498000 |
| C | -3.645377000 | -0.511309000 | -0.128203000 |
| C | -2.724932000 | 1.726867000  | -0.212891000 |
| C | -3.827350000 | 0.869894000  | -0.190609000 |
| H | -4.507131000 | -1.173335000 | -0.108440000 |
| H | -2.877297000 | 2.802026000  | -0.260571000 |
| H | -4.832163000 | 1.282508000  | -0.219040000 |
| C | -0.226783000 | 2.163547000  | -0.228226000 |
| H | -0.623762000 | 3.178085000  | -0.326170000 |
| H | 0.319786000  | 1.978909000  | -1.159418000 |
| C | 0.754982000  | 2.159476000  | 0.986593000  |
| H | 0.930998000  | 3.203043000  | 1.282052000  |
| H | 0.257551000  | 1.697431000  | 1.853527000  |
| C | 2.122155000  | 1.521834000  | 0.865884000  |
| H | 2.798140000  | 1.835823000  | 1.660972000  |
| C | 2.778990000  | 1.119869000  | -0.442963000 |
| H | 2.421280000  | 1.632760000  | -1.341927000 |
| H | 3.866901000  | 1.215219000  | -0.383351000 |
| C | -2.128312000 | -2.550723000 | -0.017409000 |
| H | -3.075164000 | -3.091876000 | 0.066713000  |
| H | -1.496813000 | -2.804782000 | 0.841188000  |
| H | -1.605529000 | -2.909867000 | -0.912285000 |
| C | 3.389514000  | -1.385348000 | -0.991279000 |
| H | 3.460167000  | -1.244304000 | -2.074536000 |
| H | 4.380382000  | -1.235048000 | -0.551532000 |
| H | 3.075534000  | -2.417031000 | -0.797913000 |
| H | 2.834069000  | -0.689323000 | 1.811396000  |

#### C-DR6-T1-TS1

|   |              |              |              |
|---|--------------|--------------|--------------|
| C | 0.938140000  | -1.086662000 | -0.856473000 |
| C | 2.266360000  | -1.050073000 | -0.264855000 |
| C | 2.123159000  | -0.502158000 | 1.076376000  |
| C | 0.703433000  | -0.498211000 | 1.400117000  |
| N | 0.035500000  | -0.728396000 | 0.173516000  |
| O | 0.607868000  | -1.341149000 | -2.016323000 |
| O | 0.134364000  | -0.251650000 | 2.461737000  |
| C | -1.272467000 | -0.206092000 | -0.066991000 |
| C | -2.397861000 | -1.014664000 | 0.130359000  |
| C | -1.363570000 | 1.140679000  | -0.462864000 |
| C | -3.657967000 | -0.442532000 | -0.083681000 |
| C | -2.639531000 | 1.676446000  | -0.666402000 |
| C | -3.778104000 | 0.890569000  | -0.477368000 |
| H | -4.548470000 | -1.048171000 | 0.062900000  |
| H | -2.740140000 | 2.714019000  | -0.974252000 |
| H | -4.763291000 | 1.320011000  | -0.637691000 |
| C | -0.111789000 | 1.971493000  | -0.687877000 |

|   |              |              |              |
|---|--------------|--------------|--------------|
| H | -0.413630000 | 2.928387000  | -1.122638000 |
| H | 0.495374000  | 1.478281000  | -1.454915000 |
| C | 0.746623000  | 2.247106000  | 0.587289000  |
| H | 0.893652000  | 3.333039000  | 0.680615000  |
| H | 0.195618000  | 1.958981000  | 1.486569000  |
| C | 2.151760000  | 1.675889000  | 0.654658000  |
| H | 2.630037000  | 1.814148000  | 1.622272000  |
| C | 2.989630000  | 1.641731000  | -0.466785000 |
| H | 2.610059000  | 1.771095000  | -1.474390000 |
| H | 4.048138000  | 1.432869000  | -0.358399000 |
| C | -2.233918000 | -2.448899000 | 0.568106000  |
| H | -3.202490000 | -2.949808000 | 0.652405000  |
| H | -1.730606000 | -2.501912000 | 1.540481000  |
| H | -1.615903000 | -3.008488000 | -0.143542000 |
| C | 3.481929000  | -1.591578000 | -0.921513000 |
| H | 4.375485000  | -1.011987000 | -0.670170000 |
| H | 3.668541000  | -2.626950000 | -0.595728000 |
| H | 3.352036000  | -1.607076000 | -2.007803000 |
| H | 2.884263000  | -0.573541000 | 1.843784000  |

#### C-DR6-T1-TS2

|   |              |              |              |
|---|--------------|--------------|--------------|
| C | 1.006222000  | -0.971135000 | -0.824510000 |
| C | 2.328542000  | -0.646250000 | -0.302522000 |
| C | 2.087970000  | -0.010169000 | 1.053374000  |
| C | 0.639695000  | -0.289076000 | 1.400297000  |
| N | 0.033005000  | -0.694760000 | 0.226339000  |
| O | 0.784162000  | -1.905301000 | -1.691388000 |
| O | 0.071632000  | -0.043705000 | 2.451582000  |
| C | -1.284632000 | -0.207082000 | -0.055018000 |
| C | -2.390426000 | -1.046986000 | 0.120720000  |
| C | -1.397575000 | 1.138786000  | -0.449755000 |
| C | -3.662421000 | -0.505624000 | -0.101346000 |
| C | -2.687065000 | 1.641907000  | -0.657553000 |
| C | -3.809169000 | 0.828970000  | -0.480291000 |
| H | -4.539287000 | -1.134818000 | 0.027196000  |
| H | -2.812707000 | 2.676907000  | -0.965345000 |
| H | -4.802348000 | 1.238056000  | -0.644711000 |
| C | -0.177332000 | 2.002397000  | -0.737629000 |
| H | -0.551170000 | 2.965582000  | -1.098166000 |
| H | 0.351544000  | 1.557525000  | -1.588682000 |
| C | 0.844987000  | 2.313200000  | 0.403378000  |
| H | 1.180114000  | 3.344419000  | 0.243510000  |
| H | 0.335462000  | 2.308489000  | 1.372725000  |
| C | 2.161498000  | 1.497133000  | 0.521618000  |
| H | 2.826808000  | 2.049398000  | 1.195347000  |
| C | 2.847523000  | 1.146366000  | -0.783818000 |

|   |              |              |              |
|---|--------------|--------------|--------------|
| H | 2.412209000  | 1.441659000  | -1.734827000 |
| H | 3.936056000  | 1.142709000  | -0.777286000 |
| C | -2.188445000 | -2.481281000 | 0.541529000  |
| H | -3.125769000 | -3.043286000 | 0.496250000  |
| H | -1.803589000 | -2.536135000 | 1.567135000  |
| H | -1.449636000 | -2.970679000 | -0.102842000 |
| C | 3.487653000  | -1.564066000 | -0.578213000 |
| H | 3.560538000  | -1.783445000 | -1.647690000 |
| H | 4.430832000  | -1.137812000 | -0.226281000 |
| H | 3.329840000  | -2.515342000 | -0.051568000 |
| H | 2.801572000  | -0.230402000 | 1.847753000  |

#### D-DR7-T1-TS1

|   |              |              |              |
|---|--------------|--------------|--------------|
| C | -1.029818000 | -0.597136000 | 1.140216000  |
| C | -2.334653000 | -0.912398000 | 0.605499000  |
| C | -2.189477000 | -1.065183000 | -0.847828000 |
| C | -0.788331000 | -0.925042000 | -1.179005000 |
| N | -0.139830000 | -0.601794000 | 0.036978000  |
| O | -0.703136000 | -0.347268000 | 2.307190000  |
| O | -0.221435000 | -0.994970000 | -2.274345000 |
| C | 1.223775000  | -0.187615000 | 0.113980000  |
| C | 2.237573000  | -1.143501000 | -0.065033000 |
| C | 1.506265000  | 1.171231000  | 0.347569000  |
| C | 3.567634000  | -0.708979000 | -0.012217000 |
| C | 2.848760000  | 1.561789000  | 0.400287000  |
| C | 3.873012000  | 0.631600000  | 0.219234000  |
| H | 4.366664000  | -1.432784000 | -0.151292000 |
| H | 3.090056000  | 2.607038000  | 0.576202000  |
| H | 4.910128000  | 0.953619000  | 0.256823000  |
| C | 0.402499000  | 2.193686000  | 0.539997000  |
| H | 0.867639000  | 3.159538000  | 0.755632000  |
| H | -0.173765000 | 1.926400000  | 1.432889000  |
| C | -0.562304000 | 2.349345000  | -0.679362000 |
| H | -0.569029000 | 3.408815000  | -0.978502000 |
| H | -0.183783000 | 1.798774000  | -1.548487000 |
| C | -1.984993000 | 1.958990000  | -0.412317000 |
| H | -2.395384000 | 2.226938000  | 0.561083000  |
| C | -2.781775000 | 1.307842000  | -1.307767000 |
| H | -2.443986000 | 1.117313000  | -2.323224000 |
| H | -3.833036000 | 1.133833000  | -1.096936000 |
| C | 1.897600000  | -2.593105000 | -0.309568000 |
| H | 2.794677000  | -3.217875000 | -0.276271000 |
| H | 1.423935000  | -2.715389000 | -1.290432000 |
| H | 1.188775000  | -2.966725000 | 0.438711000  |
| C | -3.562753000 | -1.075617000 | 1.412483000  |
| H | -3.952486000 | -2.102340000 | 1.327971000  |

|   |              |              |              |
|---|--------------|--------------|--------------|
| H | -3.359179000 | -0.861710000 | 2.465162000  |
| H | -4.364257000 | -0.411629000 | 1.058351000  |
| H | -2.929667000 | -1.468797000 | -1.526294000 |

D-DR7-T1-TS2

|   |              |              |              |
|---|--------------|--------------|--------------|
| C | -0.947996000 | -0.220608000 | 1.277299000  |
| C | -2.249248000 | -0.143639000 | 0.634035000  |
| C | -2.189622000 | -1.150226000 | -0.510964000 |
| C | -0.679865000 | -1.341333000 | -0.731484000 |
| N | -0.008689000 | -0.727300000 | 0.324085000  |
| O | -0.602225000 | 0.287535000  | 2.416555000  |
| O | -0.140095000 | -1.848801000 | -1.701908000 |
| C | 1.284298000  | -0.130888000 | 0.165941000  |
| C | 2.430184000  | -0.941017000 | 0.194982000  |
| C | 1.342083000  | 1.268077000  | -0.014120000 |
| C | 3.672707000  | -0.318325000 | 0.032352000  |
| C | 2.608032000  | 1.845877000  | -0.162196000 |
| C | 3.763530000  | 1.063541000  | -0.138816000 |
| H | 4.574697000  | -0.924590000 | 0.047264000  |
| H | 2.685595000  | 2.920498000  | -0.307092000 |
| H | 4.736701000  | 1.532431000  | -0.255883000 |
| C | 0.092934000  | 2.134841000  | -0.073797000 |
| H | 0.416839000  | 3.161693000  | -0.266277000 |
| H | -0.400161000 | 2.152278000  | 0.903157000  |
| C | -0.940833000 | 1.723108000  | -1.183391000 |
| H | -1.182074000 | 2.631672000  | -1.751396000 |
| H | -0.434961000 | 1.060732000  | -1.894519000 |
| C | -2.269983000 | 1.108308000  | -0.764786000 |
| H | -3.030282000 | 1.844022000  | -0.500017000 |
| C | -2.728277000 | -0.125820000 | -1.549735000 |
| H | -2.294743000 | -0.237518000 | -2.549900000 |
| H | -3.817286000 | -0.197395000 | -1.611967000 |
| C | 2.312605000  | -2.431469000 | 0.392325000  |
| H | 3.297832000  | -2.891537000 | 0.510731000  |
| H | 1.810420000  | -2.895016000 | -0.463832000 |
| H | 1.711709000  | -2.664058000 | 1.279244000  |
| C | -3.489208000 | 0.005599000  | 1.470243000  |
| H | -3.650501000 | -0.893115000 | 2.077956000  |
| H | -3.397536000 | 0.863309000  | 2.144433000  |
| H | -4.372212000 | 0.143532000  | 0.838612000  |
| H | -2.722704000 | -2.101862000 | -0.413604000 |

D-DR8-T1-TS1

|   |              |              |             |
|---|--------------|--------------|-------------|
| C | -0.929004000 | -0.405903000 | 1.140085000 |
| C | -2.237036000 | -0.669815000 | 0.545021000 |

|   |              |              |              |
|---|--------------|--------------|--------------|
| C | -1.989616000 | -1.391849000 | -0.689815000 |
| C | -0.573831000 | -1.343217000 | -0.978325000 |
| N | 0.028421000  | -0.722176000 | 0.151102000  |
| O | -0.669409000 | 0.063456000  | 2.247348000  |
| O | 0.040738000  | -1.704622000 | -1.984028000 |
| C | 1.317939000  | -0.113435000 | 0.121706000  |
| C | 2.467861000  | -0.918401000 | 0.104308000  |
| C | 1.377644000  | 1.294242000  | 0.090029000  |
| C | 3.712669000  | -0.280199000 | 0.047068000  |
| C | 2.643594000  | 1.888739000  | 0.041018000  |
| C | 3.801733000  | 1.110855000  | 0.016690000  |
| H | 4.616663000  | -0.883458000 | 0.031848000  |
| H | 2.719623000  | 2.972704000  | 0.011619000  |
| H | 4.775327000  | 1.591291000  | -0.027738000 |
| C | 0.131817000  | 2.166513000  | 0.133440000  |
| H | 0.449673000  | 3.198792000  | -0.038755000 |
| H | -0.277564000 | 2.145183000  | 1.149474000  |
| C | -0.992448000 | 1.825095000  | -0.886891000 |
| H | -1.223636000 | 2.738615000  | -1.452496000 |
| H | -0.632845000 | 1.119888000  | -1.644825000 |
| C | -2.339846000 | 1.363094000  | -0.357342000 |
| H | -2.632264000 | 1.742890000  | 0.620610000  |
| C | -3.350547000 | 1.091068000  | -1.292287000 |
| H | -3.111522000 | 0.962677000  | -2.343612000 |
| H | -4.378552000 | 0.932049000  | -0.986388000 |
| C | 2.358186000  | -2.421727000 | 0.155641000  |
| H | 3.341080000  | -2.883064000 | 0.287584000  |
| H | 1.911421000  | -2.805926000 | -0.767611000 |
| H | 1.711997000  | -2.741314000 | 0.981422000  |
| C | -3.463368000 | -0.788654000 | 1.391895000  |
| H | -4.374688000 | -0.633766000 | 0.806986000  |
| H | -3.522056000 | -1.791127000 | 1.836347000  |
| H | -3.431943000 | -0.062825000 | 2.209494000  |
| H | -2.724770000 | -1.856493000 | -1.331684000 |

#### D-DR8-T1-TS2

|   |              |              |              |
|---|--------------|--------------|--------------|
| C | 0.867912000  | 0.135403000  | 1.191667000  |
| C | 2.236714000  | 0.133746000  | 0.547789000  |
| C | 2.151961000  | 1.120886000  | -0.595109000 |
| C | 0.749136000  | 1.371706000  | -0.800504000 |
| N | -0.010854000 | 0.694852000  | 0.271618000  |
| O | 0.560517000  | -0.355883000 | 2.263717000  |
| O | 0.266801000  | 2.386392000  | -1.436957000 |
| C | -1.303634000 | 0.110906000  | 0.112131000  |
| C | -2.447701000 | 0.929985000  | 0.149248000  |
| C | -1.383642000 | -1.291808000 | -0.061725000 |

|   |              |              |              |
|---|--------------|--------------|--------------|
| C | -3.696981000 | 0.322184000  | -0.012598000 |
| C | -2.656349000 | -1.854029000 | -0.204433000 |
| C | -3.802524000 | -1.057649000 | -0.186371000 |
| H | -4.592802000 | 0.936844000  | 0.011549000  |
| H | -2.748921000 | -2.928058000 | -0.343425000 |
| H | -4.780440000 | -1.515491000 | -0.307323000 |
| C | -0.156089000 | -2.195495000 | -0.093858000 |
| H | -0.492260000 | -3.181484000 | -0.428327000 |
| H | 0.221664000  | -2.344690000 | 0.924495000  |
| C | 0.985739000  | -1.727629000 | -1.036471000 |
| H | 1.322918000  | -2.584456000 | -1.632307000 |
| H | 0.563237000  | -1.024975000 | -1.762728000 |
| C | 2.297077000  | -1.124111000 | -0.473468000 |
| H | 2.913710000  | -1.905392000 | -0.008796000 |
| C | 2.962102000  | -0.322646000 | -1.571029000 |
| H | 2.609383000  | -0.421700000 | -2.595720000 |
| H | 4.028136000  | -0.121107000 | -1.475353000 |
| C | -2.324095000 | 2.412788000  | 0.387031000  |
| H | -3.309294000 | 2.883386000  | 0.451871000  |
| H | -1.751065000 | 2.891653000  | -0.413759000 |
| H | -1.780433000 | 2.611885000  | 1.318420000  |
| C | 3.403834000  | 0.202272000  | 1.511789000  |
| H | 3.417916000  | 1.168139000  | 2.027835000  |
| H | 3.311957000  | -0.587811000 | 2.263113000  |
| H | 4.357009000  | 0.079438000  | 0.988619000  |
| H | 2.865966000  | 1.936739000  | -0.718097000 |

#### A-DR1-T1S0

|   |              |              |              |
|---|--------------|--------------|--------------|
| C | -0.956286300 | 0.074888000  | 1.420150400  |
| C | -2.388000700 | 0.041236000  | 0.905367300  |
| C | -2.356164700 | -1.059149300 | -0.099347000 |
| C | -0.973923300 | -1.255217400 | -0.499108100 |
| N | -0.172537000 | -0.516530100 | 0.426284100  |
| H | -3.120045900 | -0.063869000 | 1.711147500  |
| O | -0.548329200 | 0.618613200  | 2.425819700  |
| O | -0.537936200 | -1.902824500 | -1.440101400 |
| C | 1.201932300  | -0.204596100 | 0.190159100  |
| C | 2.142811600  | -1.248320300 | 0.177122000  |
| C | 1.557187400  | 1.136492300  | -0.071373000 |
| C | 3.467359000  | -0.936586300 | -0.146957000 |
| C | 2.897260800  | 1.393929400  | -0.385819100 |
| C | 3.842636100  | 0.371804100  | -0.436942100 |
| H | 4.207692200  | -1.732263500 | -0.163626000 |
| H | 3.201075900  | 2.417539700  | -0.590385200 |
| H | 4.875088400  | 0.599733200  | -0.688010200 |
| C | 0.599633200  | 2.315440600  | 0.026710000  |



|   |              |              |              |
|---|--------------|--------------|--------------|
| H | 1.212674300  | 3.222602900  | -0.015762000 |
| H | 0.128317000  | 2.328695700  | 1.013299300  |
| C | -0.493582100 | 2.483987700  | -1.075177300 |
| H | -0.813953200 | 3.539143000  | -1.000705300 |
| H | -0.019930000 | 2.382265700  | -2.058227600 |
| C | -1.715284500 | 1.618660500  | -1.025493300 |
| H | -1.991248600 | 1.074019300  | -1.924625500 |
| C | -2.595400700 | 1.442375400  | 0.175439000  |
| H | -2.426032700 | 2.225499600  | 0.924283300  |
| H | -3.652961000 | 1.485887400  | -0.118766000 |
| C | -3.507522000 | -1.675917500 | -0.797356200 |
| H | -4.182619200 | -2.179962600 | -0.091550000 |
| H | -3.156821900 | -2.401049700 | -1.536836400 |
| H | -4.112035200 | -0.915372300 | -1.315765400 |
| C | 1.748030500  | -2.665634700 | 0.509665100  |
| H | 2.628740700  | -3.266219900 | 0.756457200  |
| H | 1.233218300  | -3.131519900 | -0.336812100 |
| H | 1.062601300  | -2.696084800 | 1.363919400  |

#### A-DR2-T1S0

|   |              |              |              |
|---|--------------|--------------|--------------|
| C | -0.583657200 | -0.828136200 | 1.520443400  |
| C | -1.999330600 | -0.798831200 | 1.221011300  |
| C | -2.206383600 | -0.572848200 | -0.235073100 |
| C | -0.829866200 | -0.913911300 | -0.805068200 |
| N | 0.083416000  | -0.831514200 | 0.257902100  |
| H | -2.767800800 | -0.829352200 | 1.981901600  |
| O | -0.015001000 | -0.802016200 | 2.600200700  |
| O | -0.546507200 | -1.099388300 | -1.969000600 |
| C | 1.338410400  | -0.161787000 | 0.081925000  |
| C | 2.511575700  | -0.885083200 | -0.142082000 |
| C | 1.294254400  | 1.243587300  | 0.120669000  |
| C | 3.693333000  | -0.157598000 | -0.323757100 |
| C | 2.496701700  | 1.932248500  | -0.063585000 |
| C | 3.686472000  | 1.236153300  | -0.282454100 |
| H | 4.623533300  | -0.691565200 | -0.499997100 |
| H | 2.499767700  | 3.019145800  | -0.038626000 |
| H | 4.613644300  | 1.784803500  | -0.425073100 |
| C | -0.017644000 | 1.983627600  | 0.344315100  |
| H | 0.220311100  | 3.045660900  | 0.460252100  |
| H | -0.456662100 | 1.679865500  | 1.302588400  |
| C | -1.068364300 | 1.833979500  | -0.805837200 |
| H | -1.415748400 | 2.836927800  | -1.080331300 |
| H | -0.570510200 | 1.439951400  | -1.696482500 |
| C | -2.373402700 | 1.020536300  | -0.563075200 |
| H | -2.882494800 | 1.002160300  | -1.537972400 |
| C | -3.267645900 | 1.662165500  | 0.438377100  |

|   |              |              |              |
|---|--------------|--------------|--------------|
| H | -2.875689800 | 2.348320700  | 1.182205300  |
| H | -4.299054200 | 1.340410400  | 0.545014200  |
| C | -3.353930900 | -1.358485400 | -0.870309200 |
| H | -3.310475900 | -2.414341700 | -0.584188200 |
| H | -3.281667900 | -1.296495400 | -1.960339500 |
| H | -4.323662200 | -0.958244300 | -0.555686200 |
| C | 2.473870700  | -2.391266700 | -0.191601100 |
| H | 3.468382000  | -2.806421800 | -0.380061100 |
| H | 1.798868500  | -2.731927800 | -0.984926300 |
| H | 2.101068600  | -2.803175800 | 0.753417200  |

#### B-DR3-T1S0

|   |              |              |              |
|---|--------------|--------------|--------------|
| C | -0.807739200 | -0.385625100 | 1.604968400  |
| C | -2.222378600 | -0.547593200 | 1.323035400  |
| C | -2.450641700 | -0.505235100 | -0.138423000 |
| C | -1.041758300 | -0.735941200 | -0.693930200 |
| N | -0.148122000 | -0.491647100 | 0.344744100  |
| H | -2.978611800 | -0.563272200 | 2.097475600  |
| O | -0.238454100 | -0.180047100 | 2.665115700  |
| O | -0.747360200 | -0.980962300 | -1.846482500 |
| C | 1.236176300  | -0.206301100 | 0.120863000  |
| C | 2.125502600  | -1.267878400 | -0.090178000 |
| C | 1.632281500  | 1.140366300  | 0.067028000  |
| C | 3.463796000  | -0.956174300 | -0.350194100 |
| C | 2.980373800  | 1.407705400  | -0.195251100 |
| C | 3.888763100  | 0.370226100  | -0.401151100 |
| H | 4.173764200  | -1.762385500 | -0.515423100 |
| H | 3.317669900  | 2.440163700  | -0.239210100 |
| H | 4.931819400  | 0.597247200  | -0.604871200 |
| C | 0.649051200  | 2.272299600  | 0.292225100  |
| H | 1.209838300  | 3.212312900  | 0.284617100  |
| H | 0.228552100  | 2.178139600  | 1.300522400  |
| C | -0.528955100 | 2.367812700  | -0.750529200 |
| H | -0.528727100 | 3.394327900  | -1.150330300 |
| H | -0.326507100 | 1.714486500  | -1.606622400 |
| C | -3.491255000 | -1.474292400 | -0.700357200 |
| H | -3.280984900 | -2.500744700 | -0.383403100 |
| H | -3.472107000 | -1.444841400 | -1.793721500 |
| H | -4.495997300 | -1.206144300 | -0.356538100 |
| C | -1.878518500 | 2.072561600  | -0.169070000 |
| H | -2.124929600 | 2.572212700  | 0.766858200  |
| C | -2.796119800 | 1.002229300  | -0.636448200 |
| H | -2.795643800 | 0.927301300  | -1.731755500 |
| H | -3.822227100 | 1.197161300  | -0.304644100 |
| C | 1.636719500  | -2.694058800 | -0.049676000 |
| H | 2.468020700  | -3.397741000 | -0.151492000 |

|   |             |              |              |
|---|-------------|--------------|--------------|
| H | 0.927189300 | -2.879656800 | -0.864334200 |
| H | 1.120459300 | -2.909570800 | 0.893125200  |

B-DR4-T1S0

|   |              |              |              |
|---|--------------|--------------|--------------|
| C | 0.755477200  | 0.009702000  | 1.421525400  |
| C | 2.162248600  | 0.085910000  | 0.850587200  |
| C | 2.073262600  | 1.217584300  | -0.118136000 |
| C | 0.673375200  | 1.440588400  | -0.424098100 |
| N | -0.078194000 | 0.635619200  | 0.486918100  |
| H | 2.934425800  | 0.194602100  | 1.618254500  |
| O | 0.391437100  | -0.611528200 | 2.396760700  |
| O | 0.184400100  | 2.141359600  | -1.299664400 |
| C | -1.353622400 | 0.085576000  | 0.149868000  |
| C | -2.493791700 | 0.900939300  | 0.158584000  |
| C | -1.383015400 | -1.270082400 | -0.234321100 |
| C | -3.706657000 | 0.327200100  | -0.235817100 |
| C | -2.621770700 | -1.798453500 | -0.616477200 |
| C | -3.771467100 | -1.010435300 | -0.620369200 |
| H | -4.605479300 | 0.938314300  | -0.237566100 |
| H | -2.682311800 | -2.840877800 | -0.919549300 |
| H | -4.721155300 | -1.441672400 | -0.925490300 |
| C | -0.166422000 | -2.190958600 | -0.200106100 |
| H | -0.460734100 | -3.107708900 | -0.720901200 |
| H | 0.009630000  | -2.490271700 | 0.841235200  |
| C | 1.185975300  | -1.716336500 | -0.827253200 |
| H | 1.571519400  | -2.555149700 | -1.417867400 |
| H | 1.012223300  | -0.910108300 | -1.549081400 |
| C | 3.181521900  | 1.950716500  | -0.773760200 |
| H | 3.853092100  | 2.405592700  | -0.031373000 |
| H | 2.781667800  | 2.734983800  | -1.422519400 |
| H | 3.798488100  | 1.271992400  | -1.379264400 |
| C | 2.342907700  | -1.326815400 | 0.142738000  |
| H | 2.320277600  | -2.049289600 | 0.980054300  |
| C | 3.674165000  | -1.390223400 | -0.527642100 |
| H | 3.827003100  | -1.992888600 | -1.417331400 |
| H | 4.548903300  | -0.955865300 | -0.052940000 |
| C | -2.405532700 | 2.345000700  | 0.583288200  |
| H | -3.402116000 | 2.782846800  | 0.693708200  |
| H | -1.845613500 | 2.926888800  | -0.156086000 |
| H | -1.879079500 | 2.441152700  | 1.539858400  |

C-DR5-T1S0

|   |             |              |              |
|---|-------------|--------------|--------------|
| C | 1.143518900 | -0.314328300 | -1.021280600 |
| C | 2.475301800 | -0.419313900 | -0.274273600 |
| C | 2.124099600 | -1.312730300 | 0.856692400  |
| C | 0.688658100 | -1.299247500 | 1.048567400  |

|   |              |              |              |
|---|--------------|--------------|--------------|
| N | 0.145561800  | -0.647122100 | -0.107309700 |
| O | 0.978757000  | 0.087893700  | -2.155337400 |
| O | 0.023500400  | -1.721398300 | 1.979940900  |
| C | -1.202900100 | -0.179722000 | -0.179039200 |
| C | -2.248962700 | -1.118207000 | -0.188709300 |
| C | -1.436374400 | 1.212111200  | -0.192975700 |
| C | -3.563006600 | -0.638573800 | -0.173484100 |
| C | -2.769876300 | 1.638636700  | -0.182106300 |
| C | -3.824455600 | 0.728417700  | -0.160570900 |
| H | -4.384611500 | -1.350400900 | -0.179294400 |
| H | -2.980232700 | 2.705136100  | -0.194789900 |
| H | -4.850301700 | 1.086808800  | -0.148839600 |
| C | -0.340279800 | 2.264012200  | -0.277177100 |
| H | -0.834588200 | 3.220869100  | -0.477891300 |
| H | 0.291310100  | 2.072628700  | -1.149486800 |
| C | 0.560858000  | 2.499272700  | 0.976503200  |
| H | 1.018184800  | 3.492872000  | 0.819402400  |
| H | -0.082151000 | 2.599187900  | 1.858371600  |
| C | 1.656198400  | 1.522688200  | 1.272320500  |
| H | 1.713667900  | 1.112297300  | 2.275661100  |
| C | 2.692287300  | 1.078618800  | 0.297612600  |
| H | 2.744464600  | 1.737776700  | -0.577555400 |
| H | 3.684785400  | 1.065351300  | 0.767711600  |
| C | -1.974971900 | -2.601075500 | -0.225208900 |
| H | -2.863755400 | -3.152071200 | -0.547348500 |
| H | -1.678793900 | -2.963548800 | 0.764543000  |
| H | -1.157685600 | -2.836476600 | -0.915903100 |
| C | 3.644593300  | -0.831690100 | -1.162617400 |
| H | 4.588514300  | -0.792591500 | -0.608449500 |
| H | 3.505454100  | -1.850963000 | -1.536435300 |
| H | 3.712555600  | -0.161688900 | -2.025336900 |
| H | 2.805744300  | -1.760311000 | 1.565900000  |

#### C-DR6-T1S0

|   |              |              |              |
|---|--------------|--------------|--------------|
| C | 0.783317200  | -1.236103300 | -0.859687200 |
| C | 2.142994600  | -1.056916300 | -0.385482100 |
| C | 2.094559600  | -0.337094100 | 0.921851300  |
| C | 0.653054200  | -0.544099200 | 1.370383400  |
| N | -0.077098000 | -0.841112200 | 0.206595100  |
| O | 0.397991100  | -1.614833500 | -1.956042500 |
| O | 0.180722100  | -0.349765100 | 2.468947700  |
| C | -1.323967400 | -0.183153100 | -0.051251000 |
| C | -2.538580700 | -0.824484200 | 0.200267100  |
| C | -1.234066300 | 1.133505300  | -0.538991200 |
| C | -3.712917000 | -0.110380000 | -0.064089000 |
| C | -2.430342700 | 1.810894500  | -0.792326200 |

|   |              |              |              |
|---|--------------|--------------|--------------|
| C | -3.659438000 | 1.192210300  | -0.558487200 |
| H | -4.674368300 | -0.582457200 | 0.120860000  |
| H | -2.398145700 | 2.829569800  | -1.170915300 |
| H | -4.581289300 | 1.731439500  | -0.759670200 |
| C | 0.116944000  | 1.800472500  | -0.762769200 |
| H | -0.068072000 | 2.756069800  | -1.263554400 |
| H | 0.711891200  | 1.212550300  | -1.472559400 |
| C | 0.940867300  | 2.072128600  | 0.540162200  |
| H | 1.254502400  | 3.122659900  | 0.534639100  |
| H | 0.281389100  | 1.965309600  | 1.405968400  |
| C | 2.247763600  | 1.268786400  | 0.807601200  |
| H | 2.551462700  | 1.553909400  | 1.826051500  |
| C | 3.339301900  | 1.630021500  | -0.139668000 |
| H | 3.128842900  | 2.130939600  | -1.079016300 |
| H | 4.361967200  | 1.318762400  | 0.050665000  |
| C | -2.552217700 | -2.229193600 | 0.746949200  |
| H | -3.575417000 | -2.591814700 | 0.882933200  |
| H | -2.037780600 | -2.268622600 | 1.713873500  |
| H | -2.028787600 | -2.915189800 | 0.070993000  |
| C | 3.333451900  | -1.544691400 | -1.121779300 |
| H | 3.928296100  | -2.232524600 | -0.502643100 |
| H | 3.020642800  | -2.065904600 | -2.030921600 |
| H | 4.000915100  | -0.719006200 | -1.402208400 |
| H | 2.829569800  | -0.692538200 | 1.649982500  |

#### D-DR7-T1S0

|   |              |              |              |
|---|--------------|--------------|--------------|
| C | 1.004341300  | -0.782774200 | -1.100826300 |
| C | 2.343279700  | -0.895700300 | -0.548219200 |
| C | 2.283239600  | -0.582422200 | 0.907849300  |
| C | 0.793146200  | -0.662875200 | 1.225046300  |
| N | 0.120810000  | -0.625545200 | 0.005160000  |
| O | 0.654781200  | -0.791926200 | -2.272508600 |
| O | 0.274597100  | -0.640103200 | 2.323113700  |
| C | -1.244320300 | -0.211495100 | -0.110437000 |
| C | -2.267393600 | -1.131062300 | 0.151147000  |
| C | -1.492770400 | 1.133046300  | -0.435444100 |
| C | -3.588204000 | -0.678511200 | 0.063813000  |
| C | -2.827863800 | 1.542770400  | -0.514897100 |
| C | -3.866903100 | 0.645723200  | -0.269277100 |
| H | -4.400805200 | -1.372881400 | 0.261206100  |
| H | -3.051755900 | 2.576035700  | -0.767794200 |
| H | -4.898250400 | 0.982235300  | -0.333594100 |
| C | -0.364157100 | 2.114103600  | -0.692925200 |
| H | -0.808357200 | 3.062486900  | -1.011424300 |
| H | 0.230238100  | 1.758711500  | -1.542486400 |
| C | 0.590843200  | 2.380515700  | 0.533287100  |

|   |              |              |              |
|---|--------------|--------------|--------------|
| H | 0.594723200  | 3.467188000  | 0.713869200  |
| H | 0.166749000  | 1.932061500  | 1.438330400  |
| C | 2.004550600  | 1.921309500  | 0.333186100  |
| H | 2.512274700  | 2.256429600  | -0.569590200 |
| C | 2.703205800  | 0.921982300  | 1.201419300  |
| H | 2.484449700  | 1.092218300  | 2.264096600  |
| H | 3.788616100  | 0.988835300  | 1.065410300  |
| C | -1.938159500 | -2.552874700 | 0.530221100  |
| H | -2.846505800 | -3.154211900 | 0.630274200  |
| H | -1.400229400 | -2.578475700 | 1.484818400  |
| H | -1.296288400 | -3.025520800 | -0.222461100 |
| C | 3.555441000  | -1.083096300 | -1.377894400 |
| H | 4.169490200  | -1.918279500 | -1.013038300 |
| H | 3.275147900  | -1.270865400 | -2.417980700 |
| H | 4.197271200  | -0.188769100 | -1.348662400 |
| H | 2.872884800  | -1.243978300 | 1.551751400  |

#### D-DR8-T1S0

|   |              |              |              |
|---|--------------|--------------|--------------|
| C | -0.893243200 | -0.376930100 | 1.098719300  |
| C | -2.226710600 | -0.460080100 | 0.364914100  |
| C | -1.900094500 | -1.368805400 | -0.768295200 |
| C | -0.464272100 | -1.433462400 | -0.942879300 |
| N | 0.098066000  | -0.765752200 | 0.189504100  |
| O | -0.705217200 | 0.071389000  | 2.209994600  |
| O | 0.186126100  | -1.902820500 | -1.864592500 |
| C | 1.356168400  | -0.090340000 | 0.136005000  |
| C | 2.550371700  | -0.823626200 | 0.152644000  |
| C | 1.319200400  | 1.313136400  | 0.020043000  |
| C | 3.750322000  | -0.112541000 | 0.049499000  |
| C | 2.546057700  | 1.979465600  | -0.075415000 |
| C | 3.749752000  | 1.276287400  | -0.063033000 |
| H | 4.690691300  | -0.657538200 | 0.060543000  |
| H | 2.555380700  | 3.062789900  | -0.166781000 |
| H | 4.690622300  | 1.814123500  | -0.143226000 |
| C | 0.028930000  | 2.126974600  | 0.042454000  |
| H | 0.299978100  | 3.144788900  | -0.255608100 |
| H | -0.312584100 | 2.207726600  | 1.082096300  |
| C | -1.169467300 | 1.683296500  | -0.858174200 |
| H | -1.547249400 | 2.585362700  | -1.351820400 |
| H | -0.816985200 | 1.037622300  | -1.671196500 |
| C | -2.421207700 | 1.051585300  | -0.175763000 |
| H | -2.637502700 | 1.627008500  | 0.736385200  |
| C | -3.593581000 | 1.111466300  | -1.097872300 |
| H | -3.449138000 | 1.063434300  | -2.172968600 |
| H | -4.609965300 | 1.082716300  | -0.720442200 |
| C | 2.532658700  | -2.325770700 | 0.279955100  |

|   |              |              |              |
|---|--------------|--------------|--------------|
| H | 3.538609000  | -2.715873800 | 0.461341100  |
| H | 2.138698600  | -2.782457800 | -0.634134200 |
| H | 1.886277500  | -2.642410700 | 1.106560300  |
| C | -3.387686900 | -0.885887200 | 1.262686400  |
| H | -3.452468000 | -0.216832100 | 2.125977600  |
| H | -4.336798200 | -0.860907200 | 0.719652200  |
| H | -3.231654900 | -1.903349500 | 1.635123500  |
| H | -2.602821700 | -1.823113500 | -1.454174400 |

**Minimum-energy path connecting the T<sub>1</sub>/S<sub>0</sub> crossing point (A-DR1-T1S0) and its corresponding ground-state S0 product (A-S0-P)**

**C2-C3 distance: 3.0**

|   |              |              |              |
|---|--------------|--------------|--------------|
| C | -0.913846000 | 0.168186000  | 1.368676000  |
| C | -2.320792000 | 0.250445000  | 0.815271000  |
| C | -2.421879000 | -0.972616000 | -0.010957000 |
| C | -1.076042000 | -1.368348000 | -0.369347000 |
| N | -0.192079000 | -0.604165000 | 0.455403000  |
| H | -3.086542000 | 0.383827000  | 1.581580000  |
| O | -0.451410000 | 0.738656000  | 2.339313000  |
| O | -0.707110000 | -2.163522000 | -1.227905000 |
| C | 1.218002000  | -0.509558000 | 0.246240000  |
| C | 2.000236000  | -1.673849000 | 0.364540000  |
| C | 1.776278000  | 0.742266000  | -0.104495000 |
| C | 3.363886000  | -1.586613000 | 0.061024000  |
| C | 3.147515000  | 0.772277000  | -0.392935000 |
| C | 3.933141000  | -0.377350000 | -0.329604000 |
| H | 3.981355000  | -2.477026000 | 0.145820000  |
| H | 3.604549000  | 1.719801000  | -0.666060000 |
| H | 4.992916000  | -0.323901000 | -0.563147000 |
| C | 1.014838000  | 2.059794000  | -0.112801000 |
| H | 1.760026000  | 2.857977000  | -0.197787000 |
| H | 0.529467000  | 2.210955000  | 0.854915000  |
| C | -0.029784000 | 2.325882000  | -1.245319000 |
| H | -0.261765000 | 3.400535000  | -1.168404000 |
| H | 0.461975000  | 2.181158000  | -2.213554000 |
| C | -1.304473000 | 1.544606000  | -1.216404000 |
| H | -1.471206000 | 0.819977000  | -2.009844000 |
| C | -2.304372000 | 1.583214000  | -0.119734000 |
| H | -2.141088000 | 2.431657000  | 0.553933000  |
| H | -3.325416000 | 1.651858000  | -0.516200000 |
| C | -3.644766000 | -1.530968000 | -0.632237000 |
| H | -4.388613000 | -1.806133000 | 0.126903000  |
| H | -3.404095000 | -2.411625000 | -1.233589000 |
| H | -4.126814000 | -0.787163000 | -1.285769000 |
| C | 1.409057000  | -2.982935000 | 0.828806000  |

|   |             |              |             |
|---|-------------|--------------|-------------|
| H | 2.190625000 | -3.640778000 | 1.220067000 |
| H | 0.902203000 | -3.497558000 | 0.006471000 |
| H | 0.664093000 | -2.826206000 | 1.616403000 |

**C2-C3 distance: 2.9**

|   |              |              |              |
|---|--------------|--------------|--------------|
| C | -0.900788000 | 0.144667000  | 1.394543000  |
| C | -2.309208000 | 0.245822000  | 0.842723000  |
| C | -2.404807000 | -0.938117000 | -0.046702000 |
| C | -1.058066000 | -1.346668000 | -0.386622000 |
| N | -0.180880000 | -0.621594000 | 0.476711000  |
| H | -3.073040000 | 0.331011000  | 1.618526000  |
| O | -0.434948000 | 0.707839000  | 2.368454000  |
| O | -0.684679000 | -2.129307000 | -1.254407000 |
| C | 1.228677000  | -0.519746000 | 0.265300000  |
| C | 2.019543000  | -1.675924000 | 0.392525000  |
| C | 1.770556000  | 0.731926000  | -0.104481000 |
| C | 3.382717000  | -1.577962000 | 0.090534000  |
| C | 3.141821000  | 0.774645000  | -0.391263000 |
| C | 3.939504000  | -0.365861000 | -0.310714000 |
| H | 4.009010000  | -2.461499000 | 0.181891000  |
| H | 3.588314000  | 1.722949000  | -0.678798000 |
| H | 4.999059000  | -0.303866000 | -0.543227000 |
| C | 0.984309000  | 2.034655000  | -0.143256000 |
| H | 1.716050000  | 2.843007000  | -0.245841000 |
| H | 0.496657000  | 2.200811000  | 0.821436000  |
| C | -0.060646000 | 2.249684000  | -1.284290000 |
| H | -0.261164000 | 3.334800000  | -1.282291000 |
| H | 0.418173000  | 2.029005000  | -2.244770000 |
| C | -1.364743000 | 1.518692000  | -1.199607000 |
| H | -1.633387000 | 0.859966000  | -2.021267000 |
| C | -2.305613000 | 1.586363000  | -0.045495000 |
| H | -2.073966000 | 2.420102000  | 0.626947000  |
| H | -3.340001000 | 1.708254000  | -0.391749000 |
| C | -3.623973000 | -1.464368000 | -0.700643000 |
| H | -4.369100000 | -1.778665000 | 0.042331000  |
| H | -3.380676000 | -2.313101000 | -1.345194000 |
| H | -4.106080000 | -0.688227000 | -1.314686000 |
| C | 1.430308000  | -2.985478000 | 0.856887000  |
| H | 2.216048000  | -3.660542000 | 1.208117000  |
| H | 0.886913000  | -3.478269000 | 0.044241000  |
| H | 0.716177000  | -2.832247000 | 1.673411000  |

**C2-C3 distance: 2.8**

|   |              |              |              |
|---|--------------|--------------|--------------|
| C | -0.877066000 | 0.102354000  | 1.421287000  |
| C | -2.288002000 | 0.230967000  | 0.876997000  |
| C | -2.377279000 | -0.898129000 | -0.101599000 |



|   |              |              |              |
|---|--------------|--------------|--------------|
| C | -1.029677000 | -1.318197000 | -0.423575000 |
| N | -0.162312000 | -0.653948000 | 0.495891000  |
| H | -3.044282000 | 0.238942000  | 1.665981000  |
| O | -0.405072000 | 0.652031000  | 2.401658000  |
| O | -0.646666000 | -2.081819000 | -1.304350000 |
| C | 1.246740000  | -0.540369000 | 0.288474000  |
| C | 2.053518000  | -1.680628000 | 0.437603000  |
| C | 1.763728000  | 0.711449000  | -0.105460000 |
| C | 3.418092000  | -1.561640000 | 0.150286000  |
| C | 3.136926000  | 0.779146000  | -0.376768000 |
| C | 3.955731000  | -0.343850000 | -0.261965000 |
| H | 4.059809000  | -2.432141000 | 0.257903000  |
| H | 3.567070000  | 1.729388000  | -0.682380000 |
| H | 5.016672000  | -0.265158000 | -0.482939000 |
| C | 0.934615000  | 1.985534000  | -0.198552000 |
| H | 1.643265000  | 2.808991000  | -0.332422000 |
| H | 0.443403000  | 2.178557000  | 0.759912000  |
| C | -0.105285000 | 2.107227000  | -1.352410000 |
| H | -0.218124000 | 3.192777000  | -1.532412000 |
| H | 0.335028000  | 1.708160000  | -2.274415000 |
| C | -1.480240000 | 1.534119000  | -1.176334000 |
| H | -1.978049000 | 1.171760000  | -2.071994000 |
| C | -2.308282000 | 1.601664000  | 0.078420000  |
| H | -1.974578000 | 2.394372000  | 0.759004000  |
| H | -3.355296000 | 1.804053000  | -0.176015000 |
| C | -3.591564000 | -1.378888000 | -0.796652000 |
| H | -4.331432000 | -1.759579000 | -0.079146000 |
| H | -3.340839000 | -2.172087000 | -1.505816000 |
| H | -4.082601000 | -0.560685000 | -1.343908000 |
| C | 1.468165000  | -2.991978000 | 0.900375000  |
| H | 2.258188000  | -3.695765000 | 1.177607000  |
| H | 0.860573000  | -3.444728000 | 0.109729000  |
| H | 0.813194000  | -2.849142000 | 1.767262000  |

**C2-C3 distance: 2.7**

|   |              |              |              |
|---|--------------|--------------|--------------|
| C | -0.832838000 | 0.065086000  | 1.415401000  |
| C | -2.251377000 | 0.233857000  | 0.901768000  |
| C | -2.338580000 | -0.784872000 | -0.212211000 |
| C | -1.002042000 | -1.228959000 | -0.526458000 |
| N | -0.134935000 | -0.660992000 | 0.457082000  |
| H | -2.986133000 | 0.118707000  | 1.704560000  |
| O | -0.343136000 | 0.576353000  | 2.408646000  |
| O | -0.605686000 | -1.927396000 | -1.457164000 |
| C | 1.279170000  | -0.547725000 | 0.284204000  |
| C | 2.098410000  | -1.669721000 | 0.470087000  |
| C | 1.781954000  | 0.711135000  | -0.096729000 |

|   |              |              |              |
|---|--------------|--------------|--------------|
| C | 3.474432000  | -1.512164000 | 0.265408000  |
| C | 3.164376000  | 0.824766000  | -0.282927000 |
| C | 4.003548000  | -0.276228000 | -0.105464000 |
| H | 4.132129000  | -2.366498000 | 0.402331000  |
| H | 3.583598000  | 1.783494000  | -0.576809000 |
| H | 5.073968000  | -0.169922000 | -0.258972000 |
| C | 0.873077000  | 1.912422000  | -0.304701000 |
| H | 1.509899000  | 2.768182000  | -0.546262000 |
| H | 0.388280000  | 2.170991000  | 0.642322000  |
| C | -0.189733000 | 1.761140000  | -1.437469000 |
| H | -0.072971000 | 2.609928000  | -2.129105000 |
| H | 0.066749000  | 0.884617000  | -2.056421000 |
| C | -1.652742000 | 1.679038000  | -1.097125000 |
| H | -2.316772000 | 1.740515000  | -1.956001000 |
| C | -2.324032000 | 1.662403000  | 0.263551000  |
| H | -1.900165000 | 2.395271000  | 0.964311000  |
| H | -3.379987000 | 1.918229000  | 0.133376000  |
| C | -3.566900000 | -1.247536000 | -0.898151000 |
| H | -4.176438000 | -1.870478000 | -0.226070000 |
| H | -3.312522000 | -1.841119000 | -1.780628000 |
| H | -4.198984000 | -0.403834000 | -1.202371000 |
| C | 1.504498000  | -2.995807000 | 0.874900000  |
| H | 2.287236000  | -3.732098000 | 1.077883000  |
| H | 0.857469000  | -3.384524000 | 0.080812000  |
| H | 0.885249000  | -2.893505000 | 1.773673000  |

**C2-C3 distance: 2.6**

|   |              |              |              |
|---|--------------|--------------|--------------|
| C | -0.831541000 | 0.059745000  | 1.422711000  |
| C | -2.249600000 | 0.237717000  | 0.907547000  |
| C | -2.327776000 | -0.749815000 | -0.244280000 |
| C | -0.996286000 | -1.214144000 | -0.537195000 |
| N | -0.134600000 | -0.667553000 | 0.466863000  |
| H | -2.985741000 | 0.097537000  | 1.705396000  |
| O | -0.342061000 | 0.569647000  | 2.417719000  |
| O | -0.590042000 | -1.909954000 | -1.466327000 |
| C | 1.279014000  | -0.553174000 | 0.292632000  |
| C | 2.100246000  | -1.672261000 | 0.484682000  |
| C | 1.778129000  | 0.702012000  | -0.103252000 |
| C | 3.475340000  | -1.514926000 | 0.273852000  |
| C | 3.159689000  | 0.816183000  | -0.296269000 |
| C | 4.001195000  | -0.281751000 | -0.110855000 |
| H | 4.134723000  | -2.367204000 | 0.415542000  |
| H | 3.576572000  | 1.772514000  | -0.601140000 |
| H | 5.070843000  | -0.175345000 | -0.269592000 |
| C | 0.867625000  | 1.901838000  | -0.313726000 |
| H | 1.504184000  | 2.754633000  | -0.566149000 |

|   |              |              |              |
|---|--------------|--------------|--------------|
| H | 0.390832000  | 2.167759000  | 0.635487000  |
| C | -0.204740000 | 1.754283000  | -1.437391000 |
| H | -0.123468000 | 2.631112000  | -2.099387000 |
| H | 0.065405000  | 0.908398000  | -2.091012000 |
| C | -1.661636000 | 1.623996000  | -1.089448000 |
| H | -2.331544000 | 1.694856000  | -1.942944000 |
| C | -2.322050000 | 1.663603000  | 0.282472000  |
| H | -1.879033000 | 2.405595000  | 0.960879000  |
| H | -3.375224000 | 1.932128000  | 0.155515000  |
| C | -3.557968000 | -1.223187000 | -0.922699000 |
| H | -4.126594000 | -1.900670000 | -0.267114000 |
| H | -3.304741000 | -1.767382000 | -1.837002000 |
| H | -4.227488000 | -0.391548000 | -1.172995000 |
| C | 1.507385000  | -2.995526000 | 0.900245000  |
| H | 2.289936000  | -3.735563000 | 1.090007000  |
| H | 0.845086000  | -3.380681000 | 0.117087000  |
| H | 0.904002000  | -2.890115000 | 1.809414000  |

**C2-C3 distance: 2.5**

|   |              |              |              |
|---|--------------|--------------|--------------|
| C | -0.830136000 | 0.052324000  | 1.428554000  |
| C | -2.247023000 | 0.241113000  | 0.911490000  |
| C | -2.314096000 | -0.707883000 | -0.282815000 |
| C | -0.988452000 | -1.198089000 | -0.550769000 |
| N | -0.133701000 | -0.675526000 | 0.474442000  |
| H | -2.985184000 | 0.072625000  | 1.702277000  |
| O | -0.340893000 | 0.558472000  | 2.426418000  |
| O | -0.572487000 | -1.890175000 | -1.478674000 |
| C | 1.279671000  | -0.559764000 | 0.300262000  |
| C | 2.103616000  | -1.674959000 | 0.500225000  |
| C | 1.774243000  | 0.691726000  | -0.111262000 |
| C | 3.477826000  | -1.516572000 | 0.284746000  |
| C | 3.154940000  | 0.807707000  | -0.309811000 |
| C | 3.999604000  | -0.286093000 | -0.114312000 |
| H | 4.139667000  | -2.365895000 | 0.432670000  |
| H | 3.568806000  | 1.761587000  | -0.626268000 |
| H | 5.068564000  | -0.178834000 | -0.277070000 |
| C | 0.860181000  | 1.888273000  | -0.325651000 |
| H | 1.494163000  | 2.738712000  | -0.592132000 |
| H | 0.392890000  | 2.162747000  | 0.625994000  |
| C | -0.224324000 | 1.739394000  | -1.437162000 |
| H | -0.172270000 | 2.633446000  | -2.079267000 |
| H | 0.049517000  | 0.914492000  | -2.114583000 |
| C | -1.675419000 | 1.581623000  | -1.077808000 |
| H | -2.352418000 | 1.673743000  | -1.923680000 |
| C | -2.320518000 | 1.668822000  | 0.306034000  |
| H | -1.857788000 | 2.415342000  | 0.965546000  |

|   |              |              |              |
|---|--------------|--------------|--------------|
| H | -3.371131000 | 1.949872000  | 0.185926000  |
| C | -3.546448000 | -1.196847000 | -0.950473000 |
| H | -4.074081000 | -1.920042000 | -0.309215000 |
| H | -3.297725000 | -1.697689000 | -1.890621000 |
| H | -4.249728000 | -0.381102000 | -1.153823000 |
| C | 1.512567000  | -2.995620000 | 0.926555000  |
| H | 2.295079000  | -3.738708000 | 1.104309000  |
| H | 0.836388000  | -3.378180000 | 0.154045000  |
| H | 0.924176000  | -2.887284000 | 1.845178000  |

**C2-C3 distance: 2.4**

|   |              |              |              |
|---|--------------|--------------|--------------|
| C | -0.830142000 | 0.043452000  | 1.433757000  |
| C | -2.244654000 | 0.245052000  | 0.913544000  |
| C | -2.298815000 | -0.660564000 | -0.325425000 |
| C | -0.978831000 | -1.181833000 | -0.565171000 |
| N | -0.133307000 | -0.684904000 | 0.480737000  |
| H | -2.985784000 | 0.047926000  | 1.695179000  |
| O | -0.341204000 | 0.542940000  | 2.435595000  |
| O | -0.554116000 | -1.869740000 | -1.491686000 |
| C | 1.280142000  | -0.567461000 | 0.307741000  |
| C | 2.107154000  | -1.678236000 | 0.516262000  |
| C | 1.769470000  | 0.680288000  | -0.119995000 |
| C | 3.480419000  | -1.518313000 | 0.296027000  |
| C | 3.149215000  | 0.798319000  | -0.324356000 |
| C | 3.997498000  | -0.290797000 | -0.118303000 |
| H | 4.145116000  | -2.364192000 | 0.450761000  |
| H | 3.559619000  | 1.749614000  | -0.652869000 |
| H | 5.065680000  | -0.182418000 | -0.285335000 |
| C | 0.851413000  | 1.873189000  | -0.337899000 |
| H | 1.482542000  | 2.721600000  | -0.617301000 |
| H | 0.393364000  | 2.155368000  | 0.616098000  |
| C | -0.244938000 | 1.723772000  | -1.437639000 |
| H | -0.218637000 | 2.632831000  | -2.060154000 |
| H | 0.029445000  | 0.917843000  | -2.136207000 |
| C | -1.691530000 | 1.546671000  | -1.066917000 |
| H | -2.374544000 | 1.671640000  | -1.903771000 |
| C | -2.318454000 | 1.677095000  | 0.329795000  |
| H | -1.836536000 | 2.425660000  | 0.972577000  |
| H | -3.366658000 | 1.970174000  | 0.218704000  |
| C | -3.532902000 | -1.172898000 | -0.977698000 |
| H | -4.014885000 | -1.937211000 | -0.348214000 |
| H | -3.292086000 | -1.633504000 | -1.940376000 |
| H | -4.269873000 | -0.377960000 | -1.136529000 |
| C | 1.518774000  | -2.996360000 | 0.954000000  |
| H | 2.301707000  | -3.740967000 | 1.123433000  |
| H | 0.831813000  | -3.378895000 | 0.191006000  |

|   |             |              |             |
|---|-------------|--------------|-------------|
| H | 0.942594000 | -2.884422000 | 1.879902000 |
|---|-------------|--------------|-------------|

**C2-C3 distance: 2.3**

|   |              |              |              |
|---|--------------|--------------|--------------|
| C | -0.831779000 | 0.032214000  | 1.440740000  |
| C | -2.243119000 | 0.246453000  | 0.917021000  |
| C | -2.283248000 | -0.613659000 | -0.361991000 |
| C | -0.968109000 | -1.169930000 | -0.574452000 |
| N | -0.132998000 | -0.696388000 | 0.487435000  |
| H | -2.988928000 | 0.023722000  | 1.687284000  |
| O | -0.343146000 | 0.521264000  | 2.447580000  |
| O | -0.540510000 | -1.856066000 | -1.498869000 |
| C | 1.280709000  | -0.576242000 | 0.315026000  |
| C | 2.111629000  | -1.681906000 | 0.531945000  |
| C | 1.763064000  | 0.668142000  | -0.129479000 |
| C | 3.483533000  | -1.519705000 | 0.304903000  |
| C | 3.141500000  | 0.788477000  | -0.341557000 |
| C | 3.994370000  | -0.295284000 | -0.126103000 |
| H | 4.151822000  | -2.361511000 | 0.466122000  |
| H | 3.547465000  | 1.737202000  | -0.682737000 |
| H | 5.061408000  | -0.185134000 | -0.299107000 |
| C | 0.840935000  | 1.857750000  | -0.349302000 |
| H | 1.470152000  | 2.704522000  | -0.637987000 |
| H | 0.391175000  | 2.145483000  | 0.607112000  |
| C | -0.266103000 | 1.711829000  | -1.439123000 |
| H | -0.264856000 | 2.639264000  | -2.034263000 |
| H | 0.012301000  | 0.929764000  | -2.161286000 |
| C | -1.709448000 | 1.509196000  | -1.057305000 |
| H | -2.396992000 | 1.662820000  | -1.885984000 |
| C | -2.316441000 | 1.683219000  | 0.349884000  |
| H | -1.816343000 | 2.432307000  | 0.977252000  |
| H | -3.362685000 | 1.986822000  | 0.249916000  |
| C | -3.517426000 | -1.143907000 | -1.005641000 |
| H | -3.967406000 | -1.934740000 | -0.385909000 |
| H | -3.282072000 | -1.575797000 | -1.982936000 |
| H | -4.275083000 | -0.363738000 | -1.134850000 |
| C | 1.527836000  | -2.997497000 | 0.983296000  |
| H | 2.312422000  | -3.741280000 | 1.148650000  |
| H | 0.833122000  | -3.384372000 | 0.229479000  |
| H | 0.961321000  | -2.880537000 | 1.914511000  |

**C2-C3 distance: 2.2**

|   |              |              |              |
|---|--------------|--------------|--------------|
| C | -0.833370000 | 0.020069000  | 1.450071000  |
| C | -2.241940000 | 0.245051000  | 0.923459000  |
| C | -2.268141000 | -0.569562000 | -0.385466000 |
| C | -0.958875000 | -1.163528000 | -0.575630000 |
| N | -0.131911000 | -0.708312000 | 0.494668000  |

|   |              |              |              |
|---|--------------|--------------|--------------|
| H | -2.993793000 | 0.001008000  | 1.680867000  |
| O | -0.345303000 | 0.495721000  | 2.462526000  |
| O | -0.537333000 | -1.853149000 | -1.497348000 |
| C | 1.282133000  | -0.584744000 | 0.321451000  |
| C | 2.117781000  | -1.684925000 | 0.545308000  |
| C | 1.755819000  | 0.657497000  | -0.137866000 |
| C | 3.488093000  | -1.518784000 | 0.311433000  |
| C | 3.132856000  | 0.781392000  | -0.357167000 |
| C | 3.991357000  | -0.296440000 | -0.134197000 |
| H | 4.160839000  | -2.355965000 | 0.477893000  |
| H | 3.533446000  | 1.728381000  | -0.709329000 |
| H | 5.057144000  | -0.183229000 | -0.312839000 |
| C | 0.828377000  | 1.842852000  | -0.360495000 |
| H | 1.455430000  | 2.688587000  | -0.657033000 |
| H | 0.385725000  | 2.135760000  | 0.597832000  |
| C | -0.288017000 | 1.697200000  | -1.442040000 |
| H | -0.306768000 | 2.638109000  | -2.013853000 |
| H | -0.003254000 | 0.933580000  | -2.179760000 |
| C | -1.729643000 | 1.465327000  | -1.046674000 |
| H | -2.421441000 | 1.633473000  | -1.869722000 |
| C | -2.314766000 | 1.685760000  | 0.365146000  |
| H | -1.795511000 | 2.433316000  | 0.977179000  |
| H | -3.359374000 | 1.999085000  | 0.279942000  |
| C | -3.501392000 | -1.102773000 | -1.034146000 |
| H | -3.937264000 | -1.911613000 | -0.428936000 |
| H | -3.266172000 | -1.509991000 | -2.022014000 |
| H | -4.266599000 | -0.327291000 | -1.143301000 |
| C | 1.540347000  | -2.998948000 | 1.009206000  |
| H | 2.327957000  | -3.739615000 | 1.174100000  |
| H | 0.841837000  | -3.393101000 | 0.262600000  |
| H | 0.979800000  | -2.877438000 | 1.943409000  |

**C2-C3 distance: 2.1**

|   |              |              |              |
|---|--------------|--------------|--------------|
| C | -0.834868000 | 0.007139000  | 1.457836000  |
| C | -2.240454000 | 0.243526000  | 0.928407000  |
| C | -2.252317000 | -0.522986000 | -0.409810000 |
| C | -0.950278000 | -1.154968000 | -0.579633000 |
| N | -0.131049000 | -0.718991000 | 0.498736000  |
| H | -2.998515000 | -0.021510000 | 1.671967000  |
| O | -0.347627000 | 0.466878000  | 2.476900000  |
| O | -0.535405000 | -1.847596000 | -1.499355000 |
| C | 1.283499000  | -0.593022000 | 0.325943000  |
| C | 2.123407000  | -1.687762000 | 0.558015000  |
| C | 1.749104000  | 0.647016000  | -0.146874000 |
| C | 3.492386000  | -1.517670000 | 0.319468000  |
| C | 3.125144000  | 0.774518000  | -0.371299000 |

|   |              |              |              |
|---|--------------|--------------|--------------|
| C | 3.988785000  | -0.297391000 | -0.139755000 |
| H | 4.169484000  | -2.350036000 | 0.492157000  |
| H | 3.520856000  | 1.719745000  | -0.733549000 |
| H | 5.053612000  | -0.181275000 | -0.322209000 |
| C | 0.816556000  | 1.828224000  | -0.373003000 |
| H | 1.441308000  | 2.672562000  | -0.678532000 |
| H | 0.381451000  | 2.127192000  | 0.587090000  |
| C | -0.310171000 | 1.682250000  | -1.445142000 |
| H | -0.346008000 | 2.633448000  | -1.996974000 |
| H | -0.021391000 | 0.933835000  | -2.195646000 |
| C | -1.750345000 | 1.424538000  | -1.035796000 |
| H | -2.445330000 | 1.612971000  | -1.852683000 |
| C | -2.312483000 | 1.688992000  | 0.379942000  |
| H | -1.773860000 | 2.433677000  | 0.977272000  |
| H | -3.354943000 | 2.012682000  | 0.310153000  |
| C | -3.485183000 | -1.064542000 | -1.059131000 |
| H | -3.899118000 | -1.894940000 | -0.469280000 |
| H | -3.253304000 | -1.442672000 | -2.059298000 |
| H | -4.262937000 | -0.298676000 | -1.142327000 |
| C | 1.551346000  | -2.999914000 | 1.033548000  |
| H | 2.341595000  | -3.737031000 | 1.201659000  |
| H | 0.851974000  | -3.402327000 | 0.292054000  |
| H | 0.993153000  | -2.873124000 | 1.968420000  |

**C2-C3 distance: 2.0**

|   |              |              |              |
|---|--------------|--------------|--------------|
| C | -0.836770000 | -0.007065000 | 1.464529000  |
| C | -2.238866000 | 0.240952000  | 0.932501000  |
| C | -2.235718000 | -0.474565000 | -0.434466000 |
| C | -0.941456000 | -1.142853000 | -0.587091000 |
| N | -0.130288000 | -0.728303000 | 0.500150000  |
| H | -3.003409000 | -0.045018000 | 1.660925000  |
| O | -0.350653000 | 0.434370000  | 2.491222000  |
| O | -0.533274000 | -1.836602000 | -1.506406000 |
| C | 1.284854000  | -0.600867000 | 0.329052000  |
| C | 2.128381000  | -1.690233000 | 0.570632000  |
| C | 1.743145000  | 0.636574000  | -0.157159000 |
| C | 3.496198000  | -1.517031000 | 0.327629000  |
| C | 3.118163000  | 0.766781000  | -0.386557000 |
| C | 3.986304000  | -0.299614000 | -0.145977000 |
| H | 4.177111000  | -2.344726000 | 0.507462000  |
| H | 3.509724000  | 1.709807000  | -0.758903000 |
| H | 5.050216000  | -0.181283000 | -0.332280000 |
| C | 0.805521000  | 1.813927000  | -0.385829000 |
| H | 1.427863000  | 2.656691000  | -0.700716000 |
| H | 0.378913000  | 2.118726000  | 0.576466000  |
| C | -0.332559000 | 1.667865000  | -1.447248000 |

|   |              |              |              |
|---|--------------|--------------|--------------|
| H | -0.383998000 | 2.627226000  | -1.981461000 |
| H | -0.042049000 | 0.932621000  | -2.209250000 |
| C | -1.771090000 | 1.386294000  | -1.023311000 |
| H | -2.467910000 | 1.596928000  | -1.834234000 |
| C | -2.310753000 | 1.691828000  | 0.395144000  |
| H | -1.753892000 | 2.433042000  | 0.978620000  |
| H | -3.351001000 | 2.024868000  | 0.340335000  |
| C | -3.467847000 | -1.027838000 | -1.082947000 |
| H | -3.853125000 | -1.883832000 | -0.512030000 |
| H | -3.241884000 | -1.370764000 | -2.097135000 |
| H | -4.262171000 | -0.276503000 | -1.133941000 |
| C | 1.561035000  | -2.999370000 | 1.059811000  |
| H | 2.353686000  | -3.732382000 | 1.234336000  |
| H | 0.862127000  | -3.412016000 | 0.323405000  |
| H | 1.003542000  | -2.864880000 | 1.993996000  |

**C2-C3 distance: 1.9**

|   |              |              |              |
|---|--------------|--------------|--------------|
| C | -0.838702000 | -0.021461000 | 1.471064000  |
| C | -2.237146000 | 0.238300000  | 0.936141000  |
| C | -2.219052000 | -0.425853000 | -0.457788000 |
| C | -0.933045000 | -1.129229000 | -0.595611000 |
| N | -0.129614000 | -0.736711000 | 0.500969000  |
| H | -3.008332000 | -0.067070000 | 1.648919000  |
| O | -0.354379000 | 0.400473000  | 2.505888000  |
| O | -0.531241000 | -1.823670000 | -1.514872000 |
| C | 1.286167000  | -0.608211000 | 0.331850000  |
| C | 2.133010000  | -1.692417000 | 0.582636000  |
| C | 1.737606000  | 0.626636000  | -0.166888000 |
| C | 3.499670000  | -1.516446000 | 0.335162000  |
| C | 3.111571000  | 0.759206000  | -0.401308000 |
| C | 3.983816000  | -0.302018000 | -0.152308000 |
| H | 4.184209000  | -2.339629000 | 0.521720000  |
| H | 3.499210000  | 1.699950000  | -0.783389000 |
| H | 5.046828000  | -0.181893000 | -0.342547000 |
| C | 0.794919000  | 1.800195000  | -0.397710000 |
| H | 1.414382000  | 2.641598000  | -0.721987000 |
| H | 0.376658000  | 2.110457000  | 0.566726000  |
| C | -0.354365000 | 1.653557000  | -1.448160000 |
| H | -0.420822000 | 2.619987000  | -1.965680000 |
| H | -0.062217000 | 0.931248000  | -2.221274000 |
| C | -1.790816000 | 1.347609000  | -1.010590000 |
| H | -2.487549000 | 1.580328000  | -1.816721000 |
| C | -2.309042000 | 1.694263000  | 0.408640000  |
| H | -1.735421000 | 2.432527000  | 0.978233000  |
| H | -3.347050000 | 2.035559000  | 0.367369000  |
| C | -3.450544000 | -0.992529000 | -1.104505000 |



|   |              |              |              |
|---|--------------|--------------|--------------|
| H | -3.806335000 | -1.872664000 | -0.553119000 |
| H | -3.231960000 | -1.299803000 | -2.131757000 |
| H | -4.261102000 | -0.257274000 | -1.123242000 |
| C | 1.569876000  | -2.998256000 | 1.085120000  |
| H | 2.364688000  | -3.727069000 | 1.267162000  |
| H | 0.872216000  | -3.421233000 | 0.353292000  |
| H | 1.011981000  | -2.855700000 | 2.017839000  |

**C2-C3 distance: 1.8**

|   |              |              |              |
|---|--------------|--------------|--------------|
| C | -0.840257000 | -0.035649000 | 1.476887000  |
| C | -2.234842000 | 0.235785000  | 0.939302000  |
| C | -2.202346000 | -0.376459000 | -0.479831000 |
| C | -0.924966000 | -1.113842000 | -0.605458000 |
| N | -0.128923000 | -0.744479000 | 0.500913000  |
| H | -3.012582000 | -0.087828000 | 1.636134000  |
| O | -0.358100000 | 0.366157000  | 2.519962000  |
| O | -0.529458000 | -1.808615000 | -1.525111000 |
| C | 1.287463000  | -0.615302000 | 0.334079000  |
| C | 2.137337000  | -1.694636000 | 0.593416000  |
| C | 1.732621000  | 0.617166000  | -0.175823000 |
| C | 3.502979000  | -1.515913000 | 0.342217000  |
| C | 3.105626000  | 0.752164000  | -0.414413000 |
| C | 3.981647000  | -0.304228000 | -0.157647000 |
| H | 4.190885000  | -2.334829000 | 0.535019000  |
| H | 3.489685000  | 1.690888000  | -0.804999000 |
| H | 5.043873000  | -0.182328000 | -0.351127000 |
| C | 0.784859000  | 1.786921000  | -0.408632000 |
| H | 1.401181000  | 2.626970000  | -0.742487000 |
| H | 0.374899000  | 2.102690000  | 0.557812000  |
| C | -0.375468000 | 1.638915000  | -1.447993000 |
| H | -0.456579000 | 2.611376000  | -1.949927000 |
| H | -0.081902000 | 0.929100000  | -2.231723000 |
| C | -1.810060000 | 1.308922000  | -0.997979000 |
| H | -2.504189000 | 1.563879000  | -1.801036000 |
| C | -2.308406000 | 1.696397000  | 0.420207000  |
| H | -1.719920000 | 2.432858000  | 0.975677000  |
| H | -3.344584000 | 2.043798000  | 0.391135000  |
| C | -3.433467000 | -0.958512000 | -1.123046000 |
| H | -3.762327000 | -1.857713000 | -0.587561000 |
| H | -3.222588000 | -1.236276000 | -2.160416000 |
| H | -4.258039000 | -0.238773000 | -1.114868000 |
| C | 1.578027000  | -2.997192000 | 1.108349000  |
| H | 2.374582000  | -3.722883000 | 1.295129000  |
| H | 0.879507000  | -3.428526000 | 0.382157000  |
| H | 1.021902000  | -2.847247000 | 2.040957000  |

**C2-C3 distance: 1.7**

|   |              |              |              |
|---|--------------|--------------|--------------|
| C | -0.841283000 | -0.048394000 | 1.482045000  |
| C | -2.232155000 | 0.234236000  | 0.942349000  |
| C | -2.186119000 | -0.326243000 | -0.499782000 |
| C | -0.918094000 | -1.097183000 | -0.615410000 |
| N | -0.128553000 | -0.751886000 | 0.500790000  |
| H | -3.016059000 | -0.106215000 | 1.623462000  |
| O | -0.361308000 | 0.334380000  | 2.532637000  |
| O | -0.529463000 | -1.793076000 | -1.535382000 |
| C | 1.288459000  | -0.622293000 | 0.335986000  |
| C | 2.141261000  | -1.697036000 | 0.602945000  |
| C | 1.727950000  | 0.608159000  | -0.183475000 |
| C | 3.506024000  | -1.515402000 | 0.348894000  |
| C | 3.100115000  | 0.745779000  | -0.425285000 |
| C | 3.979701000  | -0.306015000 | -0.161464000 |
| H | 4.197115000  | -2.330299000 | 0.547233000  |
| H | 3.480802000  | 1.682820000  | -0.823152000 |
| H | 5.041259000  | -0.182229000 | -0.357402000 |
| C | 0.775454000  | 1.774206000  | -0.418661000 |
| H | 1.388444000  | 2.612547000  | -0.762965000 |
| H | 0.373809000  | 2.096382000  | 0.549414000  |
| C | -0.395536000 | 1.623577000  | -1.446827000 |
| H | -0.491111000 | 2.600962000  | -1.934615000 |
| H | -0.100819000 | 0.925543000  | -2.240415000 |
| C | -1.828288000 | 1.269958000  | -0.985280000 |
| H | -2.517730000 | 1.545832000  | -1.787006000 |
| C | -2.308645000 | 1.698836000  | 0.429692000  |
| H | -1.707262000 | 2.434821000  | 0.970778000  |
| H | -3.343428000 | 2.050360000  | 0.410886000  |
| C | -3.416626000 | -0.925737000 | -1.138629000 |
| H | -3.718431000 | -1.842164000 | -0.618178000 |
| H | -3.213908000 | -1.175890000 | -2.184811000 |
| H | -4.255025000 | -0.222731000 | -1.105274000 |
| C | 1.585736000  | -2.996890000 | 1.128511000  |
| H | 2.384059000  | -3.719693000 | 1.318859000  |
| H | 0.886202000  | -3.435427000 | 0.407554000  |
| H | 1.031525000  | -2.840838000 | 2.061250000  |

**C2-C3 distance: 1.6**

|   |              |              |              |
|---|--------------|--------------|--------------|
| C | -0.842532000 | -0.060811000 | 1.486240000  |
| C | -2.229804000 | 0.232385000  | 0.944786000  |
| C | -2.170449000 | -0.275128000 | -0.519073000 |
| C | -0.911930000 | -1.078141000 | -0.626903000 |
| N | -0.128703000 | -0.759005000 | 0.500093000  |
| H | -3.019704000 | -0.124314000 | 1.609851000  |
| O | -0.365126000 | 0.303854000  | 2.543973000  |

|   |              |              |              |
|---|--------------|--------------|--------------|
| O | -0.530025000 | -1.775020000 | -1.547421000 |
| C | 1.289023000  | -0.629133000 | 0.337422000  |
| C | 2.144603000  | -1.699350000 | 0.612198000  |
| C | 1.723608000  | 0.599141000  | -0.191054000 |
| C | 3.508549000  | -1.515321000 | 0.355152000  |
| C | 3.094877000  | 0.738851000  | -0.436407000 |
| C | 3.977667000  | -0.308637000 | -0.165931000 |
| H | 4.202537000  | -2.326361000 | 0.559109000  |
| H | 3.472423000  | 1.674063000  | -0.841514000 |
| H | 5.038549000  | -0.183435000 | -0.364619000 |
| C | 0.767097000  | 1.762102000  | -0.427951000 |
| H | 1.376955000  | 2.598170000  | -0.783362000 |
| H | 0.374562000  | 2.091176000  | 0.541840000  |
| C | -0.414702000 | 1.609076000  | -1.444143000 |
| H | -0.525272000 | 2.590957000  | -1.917841000 |
| H | -0.119774000 | 0.923105000  | -2.247983000 |
| C | -1.845416000 | 1.231588000  | -0.971292000 |
| H | -2.528235000 | 1.527887000  | -1.773150000 |
| C | -2.309544000 | 1.701204000  | 0.438521000  |
| H | -1.696378000 | 2.436676000  | 0.965993000  |
| H | -3.343067000 | 2.056009000  | 0.428342000  |
| C | -3.399579000 | -0.894709000 | -1.153136000 |
| H | -3.670593000 | -1.829334000 | -0.649819000 |
| H | -3.206823000 | -1.114771000 | -2.208164000 |
| H | -4.253415000 | -0.212160000 | -1.091985000 |
| C | 1.592849000  | -2.996169000 | 1.148981000  |
| H | 2.393037000  | -3.715688000 | 1.343820000  |
| H | 0.892785000  | -3.442551000 | 0.433311000  |
| H | 1.040021000  | -2.833448000 | 2.081391000  |

**UB3LYP-D3/6-31G\*/PCM level in toluene solution**

S0-D(C-N-C-C): -70 (degree)

|   |              |              |              |
|---|--------------|--------------|--------------|
| C | -0.980349000 | -0.688672000 | 1.639772000  |
| C | -2.450187000 | -0.791273000 | 1.405880000  |
| C | -2.695029000 | -0.752899000 | 0.089072000  |
| C | -1.369238000 | -0.645497000 | -0.623578000 |
| N | -0.382726000 | -0.582802000 | 0.365967000  |
| H | -3.153502000 | -0.870541000 | 2.225192000  |
| O | -0.382622000 | -0.679551000 | 2.696369000  |
| O | -1.186702000 | -0.634530000 | -1.825286000 |
| C | 1.023314000  | -0.456543000 | 0.122223000  |
| C | 1.703348000  | -1.552583000 | -0.440154000 |
| C | 1.680504000  | 0.742480000  | 0.449868000  |
| C | 3.070755000  | -1.417786000 | -0.698093000 |
| C | 3.053378000  | 0.827743000  | 0.184311000  |

|   |              |              |              |
|---|--------------|--------------|--------------|
| C | 3.743533000  | -0.236150000 | -0.390063000 |
| H | 3.611278000  | -2.252988000 | -1.135635000 |
| H | 3.580295000  | 1.745449000  | 0.434563000  |
| H | 4.808261000  | -0.149588000 | -0.589088000 |
| C | 0.970660000  | 1.944398000  | 1.039456000  |
| H | 1.655863000  | 2.442526000  | 1.735603000  |
| H | 0.102941000  | 1.639390000  | 1.627421000  |
| C | 0.520292000  | 2.984204000  | -0.021517000 |
| H | 0.091333000  | 3.848220000  | 0.501218000  |
| H | 1.412031000  | 3.338593000  | -0.557952000 |
| C | -0.471673000 | 2.428891000  | -1.004224000 |
| H | -0.098786000 | 1.653094000  | -1.671015000 |
| C | -1.756293000 | 2.782626000  | -1.081031000 |
| H | -2.182345000 | 3.544518000  | -0.430195000 |
| H | -2.427755000 | 2.323319000  | -1.802264000 |
| C | -3.967226000 | -0.793124000 | -0.681728000 |
| H | -3.937230000 | -1.595577000 | -1.427676000 |
| H | -4.099695000 | 0.144155000  | -1.236029000 |
| H | -4.829210000 | -0.941516000 | -0.026715000 |
| C | 0.980015000  | -2.837063000 | -0.762658000 |
| H | 1.689287000  | -3.634166000 | -1.002794000 |
| H | 0.311629000  | -2.703688000 | -1.620680000 |
| H | 0.364472000  | -3.171456000 | 0.080388000  |

S0-D(C-N-C-C): 20 (degree)

|   |              |              |              |
|---|--------------|--------------|--------------|
| C | -1.309150000 | -0.851515000 | -1.257614000 |
| C | -2.728553000 | -1.213280000 | -1.097226000 |
| C | -3.228289000 | -0.522374000 | -0.071713000 |
| C | -2.104623000 | 0.242015000  | 0.555608000  |
| N | -0.850609000 | -0.137636000 | -0.036242000 |
| H | -3.226730000 | -1.876663000 | -1.792903000 |
| O | -0.661866000 | -1.040611000 | -2.260743000 |
| O | -2.262745000 | 0.941280000  | 1.534560000  |
| C | 0.307691000  | 0.709758000  | -0.344488000 |
| C | 0.594155000  | 1.979436000  | 0.227762000  |
| C | 1.417678000  | -0.028446000 | -0.864676000 |
| C | 1.801524000  | 2.606224000  | -0.128327000 |
| C | 2.570445000  | 0.657931000  | -1.258732000 |
| C | 2.760455000  | 1.990173000  | -0.920046000 |
| H | 1.974888000  | 3.616358000  | 0.231261000  |
| H | 3.366464000  | 0.102460000  | -1.748284000 |
| H | 3.665374000  | 2.518058000  | -1.207834000 |
| C | 1.553837000  | -1.547662000 | -0.810267000 |
| H | 1.753909000  | -1.946486000 | -1.810873000 |
| H | 0.644666000  | -2.027978000 | -0.454073000 |
| C | 2.689596000  | -1.980757000 | 0.155719000  |

|   |              |              |              |
|---|--------------|--------------|--------------|
| H | 2.762785000  | -3.075828000 | 0.132984000  |
| H | 3.650520000  | -1.591011000 | -0.206435000 |
| C | 2.457054000  | -1.510729000 | 1.566236000  |
| H | 2.416757000  | -0.429510000 | 1.702548000  |
| C | 2.277808000  | -2.309597000 | 2.619292000  |
| H | 2.303817000  | -3.394132000 | 2.524482000  |
| H | 2.100255000  | -1.913885000 | 3.616204000  |
| C | -4.600808000 | -0.436700000 | 0.496070000  |
| H | -4.934572000 | 0.606508000  | 0.528782000  |
| H | -4.604659000 | -0.797115000 | 1.531417000  |
| H | -5.310525000 | -1.024896000 | -0.090416000 |
| C | -0.358701000 | 2.842972000  | 1.031053000  |
| H | 0.088232000  | 3.829299000  | 1.186056000  |
| H | -0.585197000 | 2.409307000  | 2.005548000  |
| H | -1.315551000 | 2.988927000  | 0.522802000  |

S0-D(C-N-C-C): 110 (degree)

|   |              |              |              |
|---|--------------|--------------|--------------|
| C | 1.164171000  | -0.471335000 | 1.247477000  |
| C | 2.613930000  | -0.587174000 | 0.917786000  |
| C | 2.759737000  | -0.752536000 | -0.403710000 |
| C | 1.382934000  | -0.746664000 | -1.022326000 |
| N | 0.470106000  | -0.559368000 | 0.023068000  |
| H | 3.376931000  | -0.538540000 | 1.684301000  |
| O | 0.651178000  | -0.340512000 | 2.340780000  |
| O | 1.109363000  | -0.869300000 | -2.199500000 |
| C | -0.953985000 | -0.500016000 | -0.124257000 |
| C | -1.720669000 | -1.566456000 | 0.382046000  |
| C | -1.543340000 | 0.605911000  | -0.762529000 |
| C | -3.111314000 | -1.496099000 | 0.256690000  |
| C | -2.939428000 | 0.626073000  | -0.876977000 |
| C | -3.719561000 | -0.408346000 | -0.367878000 |
| H | -3.718711000 | -2.309690000 | 0.644425000  |
| H | -3.413108000 | 1.470805000  | -1.371376000 |
| H | -4.801229000 | -0.372760000 | -0.465211000 |
| C | -0.749325000 | 1.785422000  | -1.286127000 |
| H | -1.239754000 | 2.156934000  | -2.193754000 |
| H | 0.257680000  | 1.484731000  | -1.581153000 |
| C | -0.648675000 | 2.958440000  | -0.274524000 |
| H | -0.137714000 | 3.796681000  | -0.764732000 |
| H | -1.667205000 | 3.294769000  | -0.033522000 |
| C | 0.071793000  | 2.579999000  | 0.988719000  |
| H | -0.424030000 | 1.842230000  | 1.617491000  |
| C | 1.268980000  | 3.041141000  | 1.355906000  |
| H | 1.811476000  | 3.770641000  | 0.756391000  |
| H | 1.749466000  | 2.704873000  | 2.271059000  |
| C | 3.972976000  | -0.918132000 | -1.249758000 |

|   |              |              |              |
|---|--------------|--------------|--------------|
| H | 4.019333000  | -0.126432000 | -2.006928000 |
| H | 3.931335000  | -1.868307000 | -1.795430000 |
| H | 4.885687000  | -0.891526000 | -0.649443000 |
| C | -1.068033000 | -2.755460000 | 1.043508000  |
| H | -1.783576000 | -3.573206000 | 1.167536000  |
| H | -0.679062000 | -2.487490000 | 2.031998000  |
| H | -0.223745000 | -3.128242000 | 0.452363000  |

T1-D(C-N-C-C): -60 (degree)

|   |              |              |              |
|---|--------------|--------------|--------------|
| C | -0.978555000 | -0.421369000 | 1.729346000  |
| C | -2.377251000 | -0.638162000 | 1.520938000  |
| C | -2.639127000 | -0.822569000 | 0.087166000  |
| C | -1.385428000 | -0.803379000 | -0.603101000 |
| N | -0.394536000 | -0.545581000 | 0.412550000  |
| H | -3.090787000 | -0.746989000 | 2.326451000  |
| O | -0.328636000 | -0.230696000 | 2.753273000  |
| O | -1.135957000 | -0.896928000 | -1.805107000 |
| C | 0.986798000  | -0.447215000 | 0.150041000  |
| C | 1.654008000  | -1.581432000 | -0.380425000 |
| C | 1.677064000  | 0.757056000  | 0.435684000  |
| C | 3.023242000  | -1.481370000 | -0.626353000 |
| C | 3.046588000  | 0.802131000  | 0.164028000  |
| C | 3.717836000  | -0.300653000 | -0.361595000 |
| H | 3.553106000  | -2.345855000 | -1.016682000 |
| H | 3.589756000  | 1.722752000  | 0.361067000  |
| H | 4.784439000  | -0.243030000 | -0.559896000 |
| C | 0.988305000  | 2.018974000  | 0.906470000  |
| H | 1.694584000  | 2.581669000  | 1.528009000  |
| H | 0.131714000  | 1.791311000  | 1.541095000  |
| C | 0.532847000  | 2.940767000  | -0.259240000 |
| H | 0.137037000  | 3.867469000  | 0.174612000  |
| H | 1.419609000  | 3.212374000  | -0.849811000 |
| C | -0.496990000 | 2.309399000  | -1.154265000 |
| H | -0.171738000 | 1.444111000  | -1.729885000 |
| C | -1.766028000 | 2.708538000  | -1.258612000 |
| H | -2.148700000 | 3.560722000  | -0.698950000 |
| H | -2.468438000 | 2.194714000  | -1.910094000 |
| C | -3.953705000 | -0.840038000 | -0.588244000 |
| H | -3.827786000 | -1.044951000 | -1.654437000 |
| H | -4.465966000 | 0.129066000  | -0.478203000 |
| H | -4.620119000 | -1.593473000 | -0.145365000 |
| C | 0.928995000  | -2.877298000 | -0.636285000 |
| H | 1.639009000  | -3.697246000 | -0.774857000 |
| H | 0.307399000  | -2.796281000 | -1.534360000 |
| H | 0.263781000  | -3.136578000 | 0.194797000  |

## T1-D(C-N-C-C): 10 (degree)

|   |              |              |              |
|---|--------------|--------------|--------------|
| C | -1.086019000 | -0.599813000 | -1.637836000 |
| C | -2.460388000 | -0.346881000 | -1.592824000 |
| C | -2.884261000 | 0.224422000  | -0.382246000 |
| C | -1.784119000 | 0.411481000  | 0.486642000  |
| N | -0.553524000 | -0.068811000 | -0.181645000 |
| H | -3.079026000 | -0.548631000 | -2.458551000 |
| O | -0.322727000 | -0.969370000 | -2.511757000 |
| O | -1.766752000 | 0.712712000  | 1.689300000  |
| C | 0.639578000  | 0.602794000  | -0.279721000 |
| C | 0.966731000  | 1.841391000  | 0.400296000  |
| C | 1.760199000  | -0.239573000 | -0.701131000 |
| C | 2.270909000  | 2.311595000  | 0.307105000  |
| C | 3.029989000  | 0.319294000  | -0.819409000 |
| C | 3.290807000  | 1.595901000  | -0.334640000 |
| H | 2.499547000  | 3.283760000  | 0.733303000  |
| H | 3.844708000  | -0.297043000 | -1.188650000 |
| H | 4.289818000  | 2.017242000  | -0.399773000 |
| C | 1.683355000  | -1.745702000 | -0.689523000 |
| H | 2.497995000  | -2.142212000 | -1.305497000 |
| H | 0.753228000  | -2.130109000 | -1.094405000 |
| C | 1.856304000  | -2.315209000 | 0.760744000  |
| H | 1.926855000  | -3.405495000 | 0.665168000  |
| H | 2.812360000  | -1.957647000 | 1.165624000  |
| C | 0.730576000  | -1.958885000 | 1.690481000  |
| H | 0.698414000  | -0.935716000 | 2.060111000  |
| C | -0.240982000 | -2.799671000 | 2.059624000  |
| H | -0.268498000 | -3.830868000 | 1.711644000  |
| H | -1.048593000 | -2.478691000 | 2.711466000  |
| C | -4.281573000 | 0.554849000  | 0.025076000  |
| H | -4.289666000 | 0.957957000  | 1.041142000  |
| H | -4.923315000 | -0.336352000 | 0.001208000  |
| H | -4.734888000 | 1.293246000  | -0.649546000 |
| C | -0.058608000 | 2.796536000  | 0.964818000  |
| H | 0.383237000  | 3.790376000  | 1.077485000  |
| H | -0.438131000 | 2.455728000  | 1.929205000  |
| H | -0.928545000 | 2.884212000  | 0.306511000  |

## T1-D(C-N-C-C): 120 (degree)

|   |             |              |              |
|---|-------------|--------------|--------------|
| C | 1.414667000 | -0.541794000 | -1.120247000 |
| C | 2.710444000 | -0.688277000 | -0.528647000 |
| C | 2.553498000 | -0.710858000 | 0.929818000  |
| C | 1.167653000 | -0.644558000 | 1.265443000  |
| N | 0.490003000 | -0.535650000 | -0.007628000 |
| O | 1.073938000 | -0.491679000 | -2.300726000 |
| O | 0.593961000 | -0.603288000 | 2.352236000  |

|   |              |              |              |
|---|--------------|--------------|--------------|
| C | -0.909515000 | -0.488225000 | -0.147352000 |
| C | -1.676504000 | -1.578914000 | 0.342445000  |
| C | -1.519056000 | 0.625701000  | -0.779509000 |
| C | -3.061382000 | -1.528339000 | 0.185945000  |
| C | -2.909834000 | 0.623508000  | -0.903748000 |
| C | -3.678335000 | -0.438235000 | -0.428447000 |
| H | -3.661598000 | -2.363304000 | 0.536627000  |
| H | -3.395708000 | 1.476570000  | -1.370117000 |
| H | -4.758749000 | -0.419271000 | -0.540639000 |
| C | -0.755282000 | 1.860732000  | -1.202345000 |
| H | -1.264069000 | 2.298138000  | -2.069337000 |
| H | 0.254715000  | 1.612880000  | -1.528093000 |
| C | -0.685642000 | 2.941698000  | -0.087620000 |
| H | -0.214884000 | 3.837804000  | -0.510771000 |
| H | -1.713564000 | 3.215990000  | 0.190042000  |
| C | 0.067231000  | 2.493066000  | 1.133890000  |
| H | -0.369673000 | 1.669814000  | 1.697493000  |
| C | 1.229813000  | 3.004653000  | 1.542603000  |
| H | 1.716409000  | 3.821441000  | 1.011544000  |
| H | 1.737531000  | 2.622747000  | 2.424607000  |
| C | -1.030234000 | -2.788251000 | 0.966064000  |
| H | -1.728699000 | -3.629124000 | 0.992178000  |
| H | -0.710167000 | -2.565438000 | 1.989457000  |
| H | -0.138821000 | -3.099851000 | 0.410617000  |
| C | 3.957405000  | -0.888059000 | -1.298023000 |
| H | 4.721727000  | -0.153796000 | -1.003719000 |
| H | 4.394170000  | -1.879723000 | -1.104523000 |
| H | 3.761648000  | -0.793545000 | -2.369005000 |
| H | 3.346946000  | -0.665138000 | 1.663334000  |

S0-D(C-C-C-C): 110 (degree)

|   |              |              |              |
|---|--------------|--------------|--------------|
| C | -0.982810000 | -0.677472000 | 1.641716000  |
| C | -2.452446000 | -0.781078000 | 1.407334000  |
| C | -2.696320000 | -0.749883000 | 0.090166000  |
| C | -1.370038000 | -0.646043000 | -0.622040000 |
| N | -0.384260000 | -0.577278000 | 0.367862000  |
| H | -3.156361000 | -0.855883000 | 2.226567000  |
| O | -0.385825000 | -0.663876000 | 2.698715000  |
| O | -1.186771000 | -0.640984000 | -1.823655000 |
| C | 1.022335000  | -0.457039000 | 0.124413000  |
| C | 1.698600000  | -1.556201000 | -0.436453000 |
| C | 1.683394000  | 0.740761000  | 0.448775000  |
| C | 3.066367000  | -1.426117000 | -0.695213000 |
| C | 3.056394000  | 0.821188000  | 0.182634000  |
| C | 3.743033000  | -0.246039000 | -0.389834000 |
| H | 3.604078000  | -2.263908000 | -1.131296000 |



|   |              |              |              |
|---|--------------|--------------|--------------|
| H | 3.586217000  | 1.737859000  | 0.430528000  |
| H | 4.807954000  | -0.163238000 | -0.589482000 |
| C | 0.977182000  | 1.946664000  | 1.034520000  |
| H | 1.664630000  | 2.446263000  | 1.727385000  |
| H | 0.109793000  | 1.646115000  | 1.625229000  |
| C | 0.527589000  | 2.983013000  | -0.030219000 |
| H | 0.101039000  | 3.849990000  | 0.489591000  |
| H | 1.419399000  | 3.333468000  | -0.569117000 |
| C | -0.466700000 | 2.426048000  | -1.009677000 |
| H | -0.095986000 | 1.647526000  | -1.674511000 |
| C | -1.750914000 | 2.781397000  | -1.085687000 |
| H | -2.174883000 | 3.546011000  | -0.436696000 |
| H | -2.424101000 | 2.320865000  | -1.804514000 |
| C | -3.967946000 | -0.794367000 | -0.681305000 |
| H | -3.937438000 | -1.600965000 | -1.422741000 |
| H | -4.100079000 | 0.139782000  | -1.240922000 |
| H | -4.830392000 | -0.939122000 | -0.026081000 |
| C | 0.971947000  | -2.839618000 | -0.755732000 |
| H | 1.679416000  | -3.640464000 | -0.988645000 |
| H | 0.307878000  | -2.708206000 | -1.617379000 |
| H | 0.351418000  | -3.167543000 | 0.086177000  |

S0-D(C-C-C-C): 40 (degree)

|   |              |              |              |
|---|--------------|--------------|--------------|
| C | -0.993213000 | -0.491792000 | 1.589977000  |
| C | -2.443255000 | -0.714817000 | 1.317060000  |
| C | -2.632028000 | -0.850752000 | -0.002543000 |
| C | -1.284715000 | -0.740891000 | -0.674746000 |
| N | -0.347412000 | -0.516996000 | 0.339553000  |
| H | -3.176707000 | -0.736200000 | 2.113301000  |
| O | -0.447118000 | -0.305883000 | 2.659308000  |
| O | -1.047721000 | -0.850743000 | -1.860679000 |
| C | 1.063703000  | -0.400909000 | 0.133072000  |
| C | 1.773676000  | -1.557142000 | -0.242721000 |
| C | 1.696810000  | 0.840472000  | 0.306749000  |
| C | 3.148394000  | -1.444545000 | -0.467980000 |
| C | 3.079121000  | 0.902898000  | 0.082471000  |
| C | 3.799513000  | -0.222425000 | -0.307625000 |
| H | 3.710969000  | -2.326673000 | -0.762263000 |
| H | 3.590566000  | 1.853106000  | 0.216246000  |
| H | 4.870357000  | -0.150423000 | -0.477870000 |
| C | 0.964297000  | 2.113529000  | 0.684906000  |
| H | 1.662129000  | 2.737672000  | 1.253781000  |
| H | 0.133348000  | 1.902666000  | 1.360863000  |
| C | 0.479372000  | 2.927973000  | -0.545837000 |
| H | 0.510573000  | 3.995763000  | -0.283760000 |
| H | 1.204001000  | 2.803420000  | -1.358198000 |

|   |              |              |              |
|---|--------------|--------------|--------------|
| C | -0.913190000 | 2.622999000  | -1.059707000 |
| H | -1.027482000 | 2.621560000  | -2.143367000 |
| C | -1.994254000 | 2.398655000  | -0.310419000 |
| H | -1.960302000 | 2.383359000  | 0.776664000  |
| H | -2.968270000 | 2.223914000  | -0.759520000 |
| C | -3.865564000 | -1.065541000 | -0.806219000 |
| H | -3.772548000 | -1.972895000 | -1.414367000 |
| H | -4.007773000 | -0.234127000 | -1.507159000 |
| H | -4.749855000 | -1.149456000 | -0.169694000 |
| C | 1.072906000  | -2.883755000 | -0.406195000 |
| H | 1.796963000  | -3.697943000 | -0.500734000 |
| H | 0.440676000  | -2.883005000 | -1.301261000 |
| H | 0.424521000  | -3.102524000 | 0.449993000  |

S0-D(C-C-C-C): 0 (degree)

|   |              |              |              |
|---|--------------|--------------|--------------|
| C | 1.551164000  | 0.178407000  | 1.540644000  |
| C | 2.894595000  | -0.392780000 | 1.228643000  |
| C | 3.007488000  | -0.569997000 | -0.095291000 |
| C | 1.715618000  | -0.114888000 | -0.732315000 |
| N | 0.891331000  | 0.331534000  | 0.303096000  |
| H | 3.617080000  | -0.609794000 | 2.005290000  |
| O | 1.079005000  | 0.456202000  | 2.623485000  |
| O | 1.433997000  | -0.135216000 | -1.915151000 |
| C | -0.438403000 | 0.837480000  | 0.142314000  |
| C | -0.598162000 | 2.121765000  | -0.407081000 |
| C | -1.527767000 | 0.040923000  | 0.533412000  |
| C | -1.897196000 | 2.613712000  | -0.555180000 |
| C | -2.810633000 | 0.580496000  | 0.380759000  |
| C | -2.995126000 | 1.850872000  | -0.158469000 |
| H | -2.045619000 | 3.603472000  | -0.978805000 |
| H | -3.676614000 | -0.002726000 | 0.677141000  |
| H | -4.000098000 | 2.248389000  | -0.272293000 |
| C | -1.317322000 | -1.341390000 | 1.125045000  |
| H | -1.323029000 | -1.254119000 | 2.219336000  |
| H | -0.317858000 | -1.701737000 | 0.862257000  |
| C | -2.335739000 | -2.414132000 | 0.710439000  |
| H | -2.136409000 | -3.315721000 | 1.308916000  |
| H | -3.352597000 | -2.113054000 | 1.000543000  |
| C | -2.340370000 | -2.807468000 | -0.746151000 |
| H | -3.077252000 | -3.571600000 | -1.000233000 |
| C | -1.546528000 | -2.343177000 | -1.713167000 |
| H | -0.798700000 | -1.572313000 | -1.551834000 |
| H | -1.631092000 | -2.716611000 | -2.730643000 |
| C | 4.118098000  | -1.107893000 | -0.927338000 |
| H | 4.439324000  | -0.361488000 | -1.663540000 |
| H | 3.777610000  | -1.980475000 | -1.497355000 |

|   |             |              |              |
|---|-------------|--------------|--------------|
| H | 4.975132000 | -1.395063000 | -0.313204000 |
| C | 0.598488000 | 2.937348000  | -0.830586000 |
| H | 0.302713000 | 3.955036000  | -1.100453000 |
| H | 1.091072000 | 2.483791000  | -1.698461000 |
| H | 1.343789000 | 2.999721000  | -0.029069000 |

S0-D(C-C-C-C): -50 (degree)

|   |              |              |              |
|---|--------------|--------------|--------------|
| C | -1.388045000 | -0.390607000 | 1.595100000  |
| C | -2.809456000 | -0.032822000 | 1.314607000  |
| C | -2.974844000 | 0.133323000  | -0.004992000 |
| C | -1.644764000 | -0.122882000 | -0.673238000 |
| N | -0.733403000 | -0.416475000 | 0.345193000  |
| H | -3.540780000 | 0.063990000  | 2.107156000  |
| O | -0.859693000 | -0.611014000 | 2.665161000  |
| O | -1.409849000 | -0.096862000 | -1.865289000 |
| C | 0.649357000  | -0.731968000 | 0.154389000  |
| C | 0.974914000  | -1.964320000 | -0.444046000 |
| C | 1.632267000  | 0.183513000  | 0.565740000  |
| C | 2.325308000  | -2.266225000 | -0.635771000 |
| C | 2.974250000  | -0.172027000 | 0.373051000  |
| C | 3.320594000  | -1.378728000 | -0.226224000 |
| H | 2.596365000  | -3.210907000 | -1.099686000 |
| H | 3.753809000  | 0.512771000  | 0.696618000  |
| H | 4.367205000  | -1.633011000 | -0.370219000 |
| C | 1.304114000  | 1.514779000  | 1.213799000  |
| H | 1.751132000  | 1.518926000  | 2.216236000  |
| H | 0.227466000  | 1.622079000  | 1.357130000  |
| C | 1.817363000  | 2.762847000  | 0.453897000  |
| H | 1.764586000  | 3.610966000  | 1.146882000  |
| H | 2.884400000  | 2.638119000  | 0.222736000  |
| C | 1.057818000  | 3.124123000  | -0.808028000 |
| H | 0.774468000  | 4.174117000  | -0.894250000 |
| C | 0.725050000  | 2.300354000  | -1.804375000 |
| H | 0.965288000  | 1.242696000  | -1.802098000 |
| H | 0.174371000  | 2.661707000  | -2.669302000 |
| C | -4.171984000 | 0.496223000  | -0.811278000 |
| H | -4.379490000 | -0.281282000 | -1.555939000 |
| H | -3.986994000 | 1.421055000  | -1.370679000 |
| H | -5.053783000 | 0.631617000  | -0.180225000 |
| C | -0.101284000 | -2.931151000 | -0.872975000 |
| H | 0.329911000  | -3.898759000 | -1.144811000 |
| H | -0.649458000 | -2.545190000 | -1.739741000 |
| H | -0.832291000 | -3.097161000 | -0.073057000 |

S0-D(C-C-C-C): -110 (degree)

|   |              |              |             |
|---|--------------|--------------|-------------|
| C | -1.224914000 | -0.464715000 | 1.639971000 |
|---|--------------|--------------|-------------|

|   |              |              |              |
|---|--------------|--------------|--------------|
| C | -2.685015000 | -0.311936000 | 1.374440000  |
| C | -2.890119000 | -0.232613000 | 0.052852000  |
| C | -1.548459000 | -0.347424000 | -0.631132000 |
| N | -0.585693000 | -0.442997000 | 0.381588000  |
| H | -3.409950000 | -0.279111000 | 2.178035000  |
| O | -0.663419000 | -0.576938000 | 2.710576000  |
| O | -1.348211000 | -0.375552000 | -1.828317000 |
| C | 0.824395000  | -0.589626000 | 0.174501000  |
| C | 1.291093000  | -1.769728000 | -0.435981000 |
| C | 1.698932000  | 0.428402000  | 0.593797000  |
| C | 2.665597000  | -1.899045000 | -0.656503000 |
| C | 3.068897000  | 0.247525000  | 0.363909000  |
| C | 3.551416000  | -0.897589000 | -0.262949000 |
| H | 3.041564000  | -2.801973000 | -1.130581000 |
| H | 3.760676000  | 1.023357000  | 0.683425000  |
| H | 4.617980000  | -1.016898000 | -0.433439000 |
| C | 1.239624000  | 1.716871000  | 1.243497000  |
| H | 1.976321000  | 2.000442000  | 2.004613000  |
| H | 0.295111000  | 1.581053000  | 1.774211000  |
| C | 1.103141000  | 2.891893000  | 0.238955000  |
| H | 0.935760000  | 3.810902000  | 0.818046000  |
| H | 2.052525000  | 3.015669000  | -0.296967000 |
| C | -0.017297000 | 2.691557000  | -0.741770000 |
| H | -1.024869000 | 2.720624000  | -0.321343000 |
| C | 0.141658000  | 2.424212000  | -2.037933000 |
| H | 1.131435000  | 2.362578000  | -2.486178000 |
| H | -0.702496000 | 2.232466000  | -2.693257000 |
| C | -4.135809000 | -0.074339000 | -0.746051000 |
| H | -4.243350000 | -0.906913000 | -1.451167000 |
| H | -4.086853000 | 0.839606000  | -1.350176000 |
| H | -5.020188000 | -0.030593000 | -0.105740000 |
| C | 0.346176000  | -2.872791000 | -0.845899000 |
| H | 0.893744000  | -3.798109000 | -1.046404000 |
| H | -0.206657000 | -2.597880000 | -1.750671000 |
| H | -0.393750000 | -3.078246000 | -0.063835000 |

T1-D(C-C-C-C): 110 (degree)

|   |              |              |              |
|---|--------------|--------------|--------------|
| C | -0.991937000 | -0.371439000 | 1.731466000  |
| C | -2.389474000 | -0.589510000 | 1.523452000  |
| C | -2.649818000 | -0.800810000 | 0.095331000  |
| C | -1.396921000 | -0.796359000 | -0.595113000 |
| N | -0.404704000 | -0.519288000 | 0.416327000  |
| H | -3.103954000 | -0.682380000 | 2.330116000  |
| O | -0.342453000 | -0.167590000 | 2.753191000  |
| O | -1.146597000 | -0.909173000 | -1.795451000 |
| C | 0.977948000  | -0.453282000 | 0.158990000  |

|   |              |              |              |
|---|--------------|--------------|--------------|
| C | 1.623813000  | -1.601820000 | -0.369609000 |
| C | 1.691815000  | 0.740322000  | 0.436808000  |
| C | 2.994733000  | -1.528091000 | -0.614789000 |
| C | 3.061913000  | 0.757780000  | 0.166591000  |
| C | 3.712046000  | -0.360026000 | -0.354055000 |
| H | 3.508543000  | -2.404129000 | -1.000780000 |
| H | 3.622205000  | 1.669127000  | 0.358418000  |
| H | 4.779609000  | -0.323896000 | -0.552231000 |
| C | 1.025502000  | 2.020082000  | 0.890537000  |
| H | 1.742547000  | 2.580410000  | 1.501779000  |
| H | 0.166565000  | 1.816248000  | 1.529863000  |
| C | 0.583501000  | 2.931529000  | -0.288903000 |
| H | 0.201349000  | 3.869998000  | 0.131624000  |
| H | 1.474456000  | 3.181461000  | -0.882734000 |
| C | -0.455179000 | 2.303203000  | -1.175818000 |
| H | -0.143085000 | 1.425005000  | -1.739110000 |
| C | -1.717446000 | 2.721141000  | -1.288240000 |
| H | -2.087440000 | 3.586982000  | -0.741179000 |
| H | -2.426988000 | 2.209108000  | -1.933347000 |
| C | -3.964530000 | -0.836076000 | -0.580033000 |
| H | -3.837428000 | -1.056400000 | -1.642991000 |
| H | -4.483015000 | 0.131061000  | -0.484267000 |
| H | -4.626196000 | -1.587254000 | -0.126250000 |
| C | 0.879290000  | -2.888326000 | -0.616281000 |
| H | 1.576888000  | -3.722911000 | -0.727977000 |
| H | 0.274725000  | -2.811894000 | -1.526116000 |
| H | 0.195009000  | -3.121330000 | 0.206976000  |

T1-D(C-C-C-C): 40 (degree)

|   |              |              |              |
|---|--------------|--------------|--------------|
| C | -1.109814000 | -0.067492000 | 1.680299000  |
| C | -2.516294000 | -0.133392000 | 1.451679000  |
| C | -2.783309000 | -0.477821000 | 0.060698000  |
| C | -1.537851000 | -0.702954000 | -0.603172000 |
| N | -0.522346000 | -0.432726000 | 0.400121000  |
| H | -3.248245000 | -0.041349000 | 2.242843000  |
| O | -0.449813000 | 0.161765000  | 2.690345000  |
| O | -1.290484000 | -0.982223000 | -1.774499000 |
| C | 0.853086000  | -0.553791000 | 0.176528000  |
| C | 1.362182000  | -1.811016000 | -0.262342000 |
| C | 1.714948000  | 0.550302000  | 0.419535000  |
| C | 2.735555000  | -1.929803000 | -0.461060000 |
| C | 3.082182000  | 0.367393000  | 0.203614000  |
| C | 3.593818000  | -0.852135000 | -0.235318000 |
| H | 3.141167000  | -2.887579000 | -0.774684000 |
| H | 3.754347000  | 1.204795000  | 0.371884000  |
| H | 4.662489000  | -0.967542000 | -0.392922000 |

|   |              |              |              |
|---|--------------|--------------|--------------|
| C | 1.242309000  | 1.941797000  | 0.786796000  |
| H | 1.935323000  | 2.342159000  | 1.536215000  |
| H | 0.263946000  | 1.928677000  | 1.261819000  |
| C | 1.235001000  | 2.906529000  | -0.426203000 |
| H | 1.168290000  | 3.933492000  | -0.038471000 |
| H | 2.202661000  | 2.841853000  | -0.937255000 |
| C | 0.119850000  | 2.683983000  | -1.426928000 |
| H | 0.401095000  | 2.756329000  | -2.477219000 |
| C | -1.155062000 | 2.428323000  | -1.129888000 |
| H | -1.508807000 | 2.338850000  | -0.105188000 |
| H | -1.899182000 | 2.284316000  | -1.907911000 |
| C | -4.093070000 | -0.467055000 | -0.630229000 |
| H | -3.980515000 | -0.819635000 | -1.658690000 |
| H | -4.523286000 | 0.546062000  | -0.654095000 |
| H | -4.823374000 | -1.100612000 | -0.107261000 |
| C | 0.474574000  | -3.015286000 | -0.440793000 |
| H | 1.069552000  | -3.932774000 | -0.443803000 |
| H | -0.077671000 | -2.948911000 | -1.383442000 |
| H | -0.267612000 | -3.090882000 | 0.361261000  |

T1-D(C-C-C-C): 0 (degree)

|   |              |              |              |
|---|--------------|--------------|--------------|
| C | 1.417344000  | -0.231705000 | 1.617063000  |
| C | 2.752478000  | -0.635924000 | 1.306409000  |
| C | 2.996920000  | -0.485964000 | -0.129510000 |
| C | 1.829498000  | 0.083293000  | -0.730193000 |
| N | 0.886187000  | 0.242204000  | 0.351236000  |
| H | 3.481078000  | -0.909914000 | 2.057434000  |
| O | 0.795103000  | -0.188114000 | 2.673732000  |
| O | 1.567343000  | 0.323621000  | -1.909500000 |
| C | -0.398332000 | 0.786009000  | 0.214041000  |
| C | -0.532027000 | 2.120659000  | -0.255265000 |
| C | -1.524259000 | -0.004224000 | 0.565517000  |
| C | -1.815463000 | 2.657096000  | -0.330810000 |
| C | -2.783498000 | 0.587405000  | 0.472970000  |
| C | -2.931919000 | 1.903074000  | 0.034741000  |
| H | -1.940519000 | 3.683653000  | -0.663578000 |
| H | -3.666305000 | 0.010305000  | 0.727318000  |
| H | -3.923803000 | 2.342034000  | -0.027060000 |
| C | -1.375345000 | -1.458179000 | 0.968663000  |
| H | -1.422683000 | -1.520516000 | 2.062443000  |
| H | -0.379453000 | -1.816525000 | 0.695544000  |
| C | -2.407195000 | -2.419316000 | 0.356945000  |
| H | -2.263418000 | -3.405754000 | 0.822495000  |
| H | -3.427272000 | -2.126995000 | 0.643954000  |
| C | -2.352912000 | -2.591669000 | -1.141058000 |
| H | -3.114721000 | -3.264204000 | -1.539451000 |

|   |              |              |              |
|---|--------------|--------------|--------------|
| C | -1.484396000 | -2.043334000 | -1.993376000 |
| H | -0.699522000 | -1.354812000 | -1.693159000 |
| H | -1.537822000 | -2.260386000 | -3.057191000 |
| C | 4.172707000  | -0.961236000 | -0.892049000 |
| H | 4.076677000  | -0.687052000 | -1.945679000 |
| H | 4.280498000  | -2.054433000 | -0.821987000 |
| H | 5.102694000  | -0.534085000 | -0.489630000 |
| C | 0.667672000  | 2.960721000  | -0.605520000 |
| H | 0.391103000  | 4.015348000  | -0.687852000 |
| H | 1.097248000  | 2.633331000  | -1.558170000 |
| H | 1.455702000  | 2.870284000  | 0.150655000  |

T1-D(C-C-C-C): -50 (degree)

|   |              |              |              |
|---|--------------|--------------|--------------|
| C | -1.297016000 | -0.031724000 | 1.690076000  |
| C | -2.683806000 | 0.190759000  | 1.422861000  |
| C | -2.937699000 | 0.070792000  | -0.016990000 |
| C | -1.715538000 | -0.303035000 | -0.661370000 |
| N | -0.731278000 | -0.351568000 | 0.393792000  |
| H | -3.426379000 | 0.322532000  | 2.198226000  |
| O | -0.652996000 | -0.037289000 | 2.734540000  |
| O | -1.460817000 | -0.485819000 | -1.851845000 |
| C | 0.614015000  | -0.707573000 | 0.203504000  |
| C | 0.911308000  | -1.991203000 | -0.328980000 |
| C | 1.636728000  | 0.208321000  | 0.557566000  |
| C | 2.251726000  | -2.337636000 | -0.488366000 |
| C | 2.961771000  | -0.197267000 | 0.383286000  |
| C | 3.272080000  | -1.452636000 | -0.134804000 |
| H | 2.499261000  | -3.322111000 | -0.875500000 |
| H | 3.761876000  | 0.488881000  | 0.646935000  |
| H | 4.310612000  | -1.745717000 | -0.260479000 |
| C | 1.363060000  | 1.615403000  | 1.047456000  |
| H | 1.846656000  | 1.724761000  | 2.026049000  |
| H | 0.299165000  | 1.779849000  | 1.210395000  |
| C | 1.886768000  | 2.739860000  | 0.116394000  |
| H | 1.924682000  | 3.659925000  | 0.711485000  |
| H | 2.927062000  | 2.530445000  | -0.168853000 |
| C | 1.056702000  | 3.006730000  | -1.123984000 |
| H | 0.853517000  | 4.059611000  | -1.324625000 |
| C | 0.581534000  | 2.102117000  | -1.983331000 |
| H | 0.729132000  | 1.033809000  | -1.868670000 |
| H | -0.003781000 | 2.406213000  | -2.847508000 |
| C | -4.188699000 | 0.397325000  | -0.735182000 |
| H | -4.077729000 | 0.188982000  | -1.802224000 |
| H | -4.456148000 | 1.457723000  | -0.609391000 |
| H | -5.035102000 | -0.182080000 | -0.338437000 |
| C | -0.172150000 | -2.984357000 | -0.660268000 |

|   |              |              |              |
|---|--------------|--------------|--------------|
| H | 0.244067000  | -3.990675000 | -0.759120000 |
| H | -0.666574000 | -2.713791000 | -1.599004000 |
| H | -0.945580000 | -3.007768000 | 0.115394000  |

T1-D(C-C-C-C): -110 (degree)

|   |              |              |              |
|---|--------------|--------------|--------------|
| C | -1.145242000 | -0.008099000 | 1.730622000  |
| C | -2.548725000 | -0.033884000 | 1.481680000  |
| C | -2.804188000 | -0.358637000 | 0.083672000  |
| C | -1.556855000 | -0.614706000 | -0.562187000 |
| N | -0.544985000 | -0.359739000 | 0.452323000  |
| H | -3.288726000 | 0.069330000  | 2.263883000  |
| O | -0.499570000 | 0.181167000  | 2.758796000  |
| O | -1.305749000 | -0.911634000 | -1.728982000 |
| C | 0.830508000  | -0.517510000 | 0.240995000  |
| C | 1.308748000  | -1.778544000 | -0.218600000 |
| C | 1.720946000  | 0.561861000  | 0.501599000  |
| C | 2.677071000  | -1.921344000 | -0.438359000 |
| C | 3.079883000  | 0.357318000  | 0.256151000  |
| C | 3.559693000  | -0.863646000 | -0.214585000 |
| H | 3.058936000  | -2.883240000 | -0.768969000 |
| H | 3.771233000  | 1.177850000  | 0.429345000  |
| H | 4.622812000  | -0.996830000 | -0.394200000 |
| C | 1.275613000  | 1.945408000  | 0.915442000  |
| H | 2.081639000  | 2.394455000  | 1.507294000  |
| H | 0.404177000  | 1.905668000  | 1.568733000  |
| C | 0.987475000  | 2.885984000  | -0.289960000 |
| H | 0.865321000  | 3.901245000  | 0.111566000  |
| H | 1.865320000  | 2.901467000  | -0.948148000 |
| C | -0.234120000 | 2.492071000  | -1.069957000 |
| H | -1.188678000 | 2.629748000  | -0.558953000 |
| C | -0.216020000 | 1.938797000  | -2.283224000 |
| H | 0.719092000  | 1.759065000  | -2.810273000 |
| H | -1.123762000 | 1.619579000  | -2.784723000 |
| C | -4.107389000 | -0.338052000 | -0.619744000 |
| H | -3.983745000 | -0.670456000 | -1.653595000 |
| H | -4.543338000 | 0.672543000  | -0.625943000 |
| H | -4.839352000 | -0.986570000 | -0.117218000 |
| C | 0.398595000  | -2.966528000 | -0.395887000 |
| H | 0.975895000  | -3.895306000 | -0.383968000 |
| H | -0.142591000 | -2.898916000 | -1.344686000 |
| H | -0.352755000 | -3.020653000 | 0.399135000  |

**UB3LYP-D3/6-31G\* level in vacuo**

**Minimum-energy path connecting the T<sub>1</sub>/S<sub>0</sub> crossing point (A-DR1-T1S0) and its corresponding ground-state S0 product (A-S0-P)**



**C2-C3 distance: 3.0**

|   |              |              |              |
|---|--------------|--------------|--------------|
| C | -0.917355000 | 0.192953000  | 1.369187000  |
| C | -2.327467000 | 0.263698000  | 0.810367000  |
| C | -2.427659000 | -0.974063000 | 0.009242000  |
| C | -1.079005000 | -1.375630000 | -0.346572000 |
| N | -0.194782000 | -0.596732000 | 0.466319000  |
| H | -3.089812000 | 0.413116000  | 1.578414000  |
| O | -0.466095000 | 0.785188000  | 2.326459000  |
| O | -0.721297000 | -2.181131000 | -1.194206000 |
| C | 1.214772000  | -0.505378000 | 0.251216000  |
| C | 1.993352000  | -1.672752000 | 0.355806000  |
| C | 1.777959000  | 0.744870000  | -0.095695000 |
| C | 3.354779000  | -1.588242000 | 0.045515000  |
| C | 3.146778000  | 0.771527000  | -0.390470000 |
| C | 3.927984000  | -0.380357000 | -0.338764000 |
| H | 3.967815000  | -2.482832000 | 0.119496000  |
| H | 3.605941000  | 1.719662000  | -0.658858000 |
| H | 4.986990000  | -0.329888000 | -0.577128000 |
| C | 1.022763000  | 2.064976000  | -0.097688000 |
| H | 1.770402000  | 2.861494000  | -0.184868000 |
| H | 0.543003000  | 2.215964000  | 0.872571000  |
| C | -0.022496000 | 2.335595000  | -1.230028000 |
| H | -0.269455000 | 3.406214000  | -1.142094000 |
| H | 0.474762000  | 2.207419000  | -2.198096000 |
| C | -1.285572000 | 1.535978000  | -1.217137000 |
| H | -1.407587000 | 0.774095000  | -1.983405000 |
| C | -2.309357000 | 1.580812000  | -0.143499000 |
| H | -2.166095000 | 2.441332000  | 0.519839000  |
| H | -3.323297000 | 1.636639000  | -0.562838000 |
| C | -3.642611000 | -1.544282000 | -0.619628000 |
| H | -4.385694000 | -1.844667000 | 0.131857000  |
| H | -3.380229000 | -2.413098000 | -1.229523000 |
| H | -4.137905000 | -0.804111000 | -1.268426000 |
| C | 1.402895000  | -2.984991000 | 0.810050000  |
| H | 2.184457000  | -3.642825000 | 1.202398000  |
| H | 0.900364000  | -3.493779000 | -0.018342000 |
| H | 0.656824000  | -2.834016000 | 1.597806000  |

**C2-C3 distance: 2.9**

|   |              |              |              |
|---|--------------|--------------|--------------|
| C | -0.905384000 | 0.172027000  | 1.394267000  |
| C | -2.317386000 | 0.260228000  | 0.837156000  |
| C | -2.412008000 | -0.940763000 | -0.023919000 |
| C | -1.063457000 | -1.357628000 | -0.359526000 |
| N | -0.184830000 | -0.612509000 | 0.486866000  |
| H | -3.078172000 | 0.364957000  | 1.614787000  |

|   |              |              |              |
|---|--------------|--------------|--------------|
| O | -0.451160000 | 0.755332000  | 2.355967000  |
| O | -0.702646000 | -2.155000000 | -1.213530000 |
| C | 1.224118000  | -0.514139000 | 0.268862000  |
| C | 2.010765000  | -1.674121000 | 0.380833000  |
| C | 1.771760000  | 0.736196000  | -0.096330000 |
| C | 3.371500000  | -1.579959000 | 0.070491000  |
| C | 3.140210000  | 0.774154000  | -0.391396000 |
| C | 3.932711000  | -0.369510000 | -0.324525000 |
| H | 3.992787000  | -2.468308000 | 0.150143000  |
| H | 3.589335000  | 1.722982000  | -0.673989000 |
| H | 4.991255000  | -0.311176000 | -0.563236000 |
| C | 0.994289000  | 2.043306000  | -0.125915000 |
| H | 1.729794000  | 2.849058000  | -0.229329000 |
| H | 0.512215000  | 2.208432000  | 0.841385000  |
| C | -0.052746000 | 2.268028000  | -1.265225000 |
| H | -0.274969000 | 3.348435000  | -1.240037000 |
| H | 0.433095000  | 2.074749000  | -2.228175000 |
| C | -1.339179000 | 1.505644000  | -1.198308000 |
| H | -1.541161000 | 0.780269000  | -1.981975000 |
| C | -2.310524000 | 1.584890000  | -0.073615000 |
| H | -2.101661000 | 2.432489000  | 0.589325000  |
| H | -3.338690000 | 1.691680000  | -0.446787000 |
| C | -3.622861000 | -1.479806000 | -0.686101000 |
| H | -4.375261000 | -1.802229000 | 0.047055000  |
| H | -3.359267000 | -2.327875000 | -1.323986000 |
| H | -4.107549000 | -0.713483000 | -1.311739000 |
| C | 1.422620000  | -2.987083000 | 0.835066000  |
| H | 2.207631000  | -3.656901000 | 1.199010000  |
| H | 0.895146000  | -3.480581000 | 0.012651000  |
| H | 0.697751000  | -2.839027000 | 1.643052000  |

**C2-C3 distance: 2.8**

|   |              |              |              |
|---|--------------|--------------|--------------|
| C | -0.886648000 | 0.138078000  | 1.423775000  |
| C | -2.301677000 | 0.246530000  | 0.872931000  |
| C | -2.389410000 | -0.908185000 | -0.062573000 |
| C | -1.040053000 | -1.336853000 | -0.380838000 |
| N | -0.169563000 | -0.639348000 | 0.510537000  |
| H | -3.057200000 | 0.290129000  | 1.662402000  |
| O | -0.427188000 | 0.713926000  | 2.388374000  |
| O | -0.673822000 | -2.119452000 | -1.245906000 |
| C | 1.238298000  | -0.530119000 | 0.290529000  |
| C | 2.038203000  | -1.677720000 | 0.417358000  |
| C | 1.763741000  | 0.719884000  | -0.099106000 |
| C | 3.398531000  | -1.568012000 | 0.110995000  |
| C | 3.132345000  | 0.776281000  | -0.390100000 |
| C | 3.942223000  | -0.353805000 | -0.298562000 |

|   |              |              |              |
|---|--------------|--------------|--------------|
| H | 4.032706000  | -2.446083000 | 0.201936000  |
| H | 3.566920000  | 1.726201000  | -0.691318000 |
| H | 5.000689000  | -0.282953000 | -0.534320000 |
| C | 0.953529000  | 2.006294000  | -0.166863000 |
| H | 1.671544000  | 2.823782000  | -0.295145000 |
| H | 0.471535000  | 2.191187000  | 0.797533000  |
| C | -0.093890000 | 2.165067000  | -1.313698000 |
| H | -0.261620000 | 3.254300000  | -1.401771000 |
| H | 0.368860000  | 1.856947000  | -2.258283000 |
| C | -1.428158000 | 1.495661000  | -1.175664000 |
| H | -1.799877000 | 0.926439000  | -2.023358000 |
| C | -2.314193000 | 1.592257000  | 0.027633000  |
| H | -2.019733000 | 2.410613000  | 0.695091000  |
| H | -3.355884000 | 1.765441000  | -0.275043000 |
| C | -3.592043000 | -1.398021000 | -0.774577000 |
| H | -4.370132000 | -1.727613000 | -0.072110000 |
| H | -3.328441000 | -2.229187000 | -1.434296000 |
| H | -4.042950000 | -0.600321000 | -1.385863000 |
| C | 1.454433000  | -2.991060000 | 0.874811000  |
| H | 2.244754000  | -3.681432000 | 1.184582000  |
| H | 0.878788000  | -3.457865000 | 0.068873000  |
| H | 0.773453000  | -2.848230000 | 1.721309000  |

**C2-C3 distance: 2.7**

|   |              |              |              |
|---|--------------|--------------|--------------|
| C | -0.829339000 | 0.084890000  | 1.422682000  |
| C | -2.253368000 | 0.245623000  | 0.907004000  |
| C | -2.340297000 | -0.781696000 | -0.193300000 |
| C | -1.001608000 | -1.240861000 | -0.501532000 |
| N | -0.132803000 | -0.658815000 | 0.470382000  |
| H | -2.982230000 | 0.136803000  | 1.717488000  |
| O | -0.347601000 | 0.614668000  | 2.403504000  |
| O | -0.623228000 | -1.954311000 | -1.421743000 |
| C | 1.280577000  | -0.545421000 | 0.290228000  |
| C | 2.100762000  | -1.667590000 | 0.462903000  |
| C | 1.782010000  | 0.713562000  | -0.089367000 |
| C | 3.474915000  | -1.507326000 | 0.254092000  |
| C | 3.162273000  | 0.829917000  | -0.279641000 |
| C | 4.002670000  | -0.270111000 | -0.109792000 |
| H | 4.132858000  | -2.363030000 | 0.382029000  |
| H | 3.579248000  | 1.790678000  | -0.571136000 |
| H | 5.072774000  | -0.162327000 | -0.265632000 |
| C | 0.868266000  | 1.909857000  | -0.301654000 |
| H | 1.500059000  | 2.768008000  | -0.550868000 |
| H | 0.386169000  | 2.171701000  | 0.645572000  |
| C | -0.193863000 | 1.737755000  | -1.433641000 |
| H | -0.060419000 | 2.557528000  | -2.157248000 |

|   |              |              |              |
|---|--------------|--------------|--------------|
| H | 0.050128000  | 0.833152000  | -2.016336000 |
| C | -1.659359000 | 1.691352000  | -1.092295000 |
| H | -2.322878000 | 1.734307000  | -1.953342000 |
| C | -2.329008000 | 1.672320000  | 0.266437000  |
| H | -1.901677000 | 2.400122000  | 0.970381000  |
| H | -3.385141000 | 1.933501000  | 0.138663000  |
| C | -3.558771000 | -1.244835000 | -0.898158000 |
| H | -4.200217000 | -1.841003000 | -0.230777000 |
| H | -3.282879000 | -1.865584000 | -1.755296000 |
| H | -4.169567000 | -0.401519000 | -1.247330000 |
| C | 1.509314000  | -2.998370000 | 0.852892000  |
| H | 2.293545000  | -3.730060000 | 1.068389000  |
| H | 0.881472000  | -3.387214000 | 0.043606000  |
| H | 0.875284000  | -2.902914000 | 1.742112000  |

**C2-C3 distance: 2.6**

|   |              |              |              |
|---|--------------|--------------|--------------|
| C | -0.827661000 | 0.081698000  | 1.429214000  |
| C | -2.251577000 | 0.251828000  | 0.912863000  |
| C | -2.330225000 | -0.744817000 | -0.225441000 |
| C | -0.996231000 | -1.224633000 | -0.512770000 |
| N | -0.132539000 | -0.663452000 | 0.478709000  |
| H | -2.981180000 | 0.117730000  | 1.719186000  |
| O | -0.345391000 | 0.610206000  | 2.411128000  |
| O | -0.609295000 | -1.933745000 | -1.432948000 |
| C | 1.280629000  | -0.549893000 | 0.298111000  |
| C | 2.102163000  | -1.669760000 | 0.476175000  |
| C | 1.779194000  | 0.705907000  | -0.093850000 |
| C | 3.475720000  | -1.509454000 | 0.263600000  |
| C | 3.158859000  | 0.823161000  | -0.288407000 |
| C | 4.001090000  | -0.274304000 | -0.110887000 |
| H | 4.134972000  | -2.363520000 | 0.395745000  |
| H | 3.574090000  | 1.781935000  | -0.588917000 |
| H | 5.070713000  | -0.166328000 | -0.269871000 |
| C | 0.863179000  | 1.899682000  | -0.311061000 |
| H | 1.494026000  | 2.755303000  | -0.571188000 |
| H | 0.386914000  | 2.169316000  | 0.637100000  |
| C | -0.206411000 | 1.726246000  | -1.435889000 |
| H | -0.101881000 | 2.567816000  | -2.139571000 |
| H | 0.050947000  | 0.842470000  | -2.043481000 |
| C | -1.668053000 | 1.637263000  | -1.086515000 |
| H | -2.337398000 | 1.701371000  | -1.941632000 |
| C | -2.327115000 | 1.674597000  | 0.284018000  |
| H | -1.882566000 | 2.412789000  | 0.965866000  |
| H | -3.380663000 | 1.947225000  | 0.158612000  |
| C | -3.551352000 | -1.222693000 | -0.917980000 |
| H | -4.139832000 | -1.887939000 | -0.266453000 |

|   |              |              |              |
|---|--------------|--------------|--------------|
| H | -3.276791000 | -1.783656000 | -1.815983000 |
| H | -4.212541000 | -0.392965000 | -1.198908000 |
| C | 1.510608000  | -2.998489000 | 0.872786000  |
| H | 2.294437000  | -3.733414000 | 1.078602000  |
| H | 0.872113000  | -3.383768000 | 0.070123000  |
| H | 0.887119000  | -2.900954000 | 1.769187000  |

**C2-C3 distance: 2.5**

|   |              |              |              |
|---|--------------|--------------|--------------|
| C | -0.826707000 | 0.076694000  | 1.434420000  |
| C | -2.249551000 | 0.257560000  | 0.916167000  |
| C | -2.317513000 | -0.702152000 | -0.264161000 |
| C | -0.988747000 | -1.208358000 | -0.526107000 |
| N | -0.132134000 | -0.669931000 | 0.485800000  |
| H | -2.981119000 | 0.095570000  | 1.715849000  |
| O | -0.344336000 | 0.602063000  | 2.418500000  |
| O | -0.593263000 | -1.913734000 | -1.445218000 |
| C | 1.280957000  | -0.555595000 | 0.305644000  |
| C | 2.104453000  | -1.672448000 | 0.490079000  |
| C | 1.775834000  | 0.696924000  | -0.099766000 |
| C | 3.477320000  | -1.511392000 | 0.273762000  |
| C | 3.154763000  | 0.815724000  | -0.298766000 |
| C | 3.999508000  | -0.278434000 | -0.112536000 |
| H | 4.138480000  | -2.363186000 | 0.411007000  |
| H | 3.567621000  | 1.772445000  | -0.609034000 |
| H | 5.068585000  | -0.169850000 | -0.274735000 |
| C | 0.856554000  | 1.887524000  | -0.321239000 |
| H | 1.485424000  | 2.741015000  | -0.593024000 |
| H | 0.387412000  | 2.164607000  | 0.628468000  |
| C | -0.222391000 | 1.712395000  | -1.437034000 |
| H | -0.143371000 | 2.570888000  | -2.123790000 |
| H | 0.041822000  | 0.846049000  | -2.065562000 |
| C | -1.680164000 | 1.593993000  | -1.077865000 |
| H | -2.355241000 | 1.689218000  | -1.925639000 |
| C | -2.325561000 | 1.680710000  | 0.304537000  |
| H | -1.863434000 | 2.425049000  | 0.967514000  |
| H | -3.376676000 | 1.964706000  | 0.184270000  |
| C | -3.541089000 | -1.201661000 | -0.940178000 |
| H | -4.080288000 | -1.916972000 | -0.298568000 |
| H | -3.271897000 | -1.718194000 | -1.866118000 |
| H | -4.243935000 | -0.391296000 | -1.169439000 |
| C | 1.513662000  | -2.999172000 | 0.894385000  |
| H | 2.297436000  | -3.736688000 | 1.091014000  |
| H | 0.864833000  | -3.381956000 | 0.098810000  |
| H | 0.900823000  | -2.899358000 | 1.797829000  |

**C2-C3 distance: 2.4**

|   |              |              |              |
|---|--------------|--------------|--------------|
| C | -0.826803000 | 0.070157000  | 1.439025000  |
| C | -2.247688000 | 0.263151000  | 0.918215000  |
| C | -2.303563000 | -0.655323000 | -0.306141000 |
| C | -0.979966000 | -1.192883000 | -0.539690000 |
| N | -0.132214000 | -0.678258000 | 0.491876000  |
| H | -2.981772000 | 0.072928000  | 1.709608000  |
| O | -0.344024000 | 0.590227000  | 2.426035000  |
| O | -0.577108000 | -1.894829000 | -1.457254000 |
| C | 1.281039000  | -0.562586000 | 0.312811000  |
| C | 2.107049000  | -1.675807000 | 0.504354000  |
| C | 1.771372000  | 0.686739000  | -0.106522000 |
| C | 3.479129000  | -1.513371000 | 0.284129000  |
| C | 3.149506000  | 0.807488000  | -0.310241000 |
| C | 3.997369000  | -0.282711000 | -0.114864000 |
| H | 4.142678000  | -2.362381000 | 0.426993000  |
| H | 3.559460000  | 1.762087000  | -0.630784000 |
| H | 5.065804000  | -0.173020000 | -0.280501000 |
| C | 0.848680000  | 1.874091000  | -0.331764000 |
| H | 1.475549000  | 2.725561000  | -0.614408000 |
| H | 0.386712000  | 2.158104000  | 0.619540000  |
| C | -0.239783000 | 1.698800000  | -1.438507000 |
| H | -0.184340000 | 2.573368000  | -2.107149000 |
| H | 0.028565000  | 0.849573000  | -2.087298000 |
| C | -1.694498000 | 1.556772000  | -1.069470000 |
| H | -2.373964000 | 1.690551000  | -1.908688000 |
| C | -2.323805000 | 1.689274000  | 0.325619000  |
| H | -1.844504000 | 2.437325000  | 0.971709000  |
| H | -3.372676000 | 1.984037000  | 0.212295000  |
| C | -3.528748000 | -1.181876000 | -0.962823000 |
| H | -4.018546000 | -1.937714000 | -0.327898000 |
| H | -3.267751000 | -1.661511000 | -1.910758000 |
| H | -4.268483000 | -0.394153000 | -1.147908000 |
| C | 1.518030000  | -3.000615000 | 0.917353000  |
| H | 2.302225000  | -3.739828000 | 1.105824000  |
| H | 0.859617000  | -3.382353000 | 0.129148000  |
| H | 0.915526000  | -2.898257000 | 1.827409000  |

**C2-C3 distance: 2.3**

|   |              |              |              |
|---|--------------|--------------|--------------|
| C | -0.828102000 | 0.061783000  | 1.443789000  |
| C | -2.245965000 | 0.267778000  | 0.920158000  |
| C | -2.288735000 | -0.606589000 | -0.348456000 |
| C | -0.969994000 | -1.180341000 | -0.551603000 |
| N | -0.132860000 | -0.688864000 | 0.497437000  |
| H | -2.983358000 | 0.050631000  | 1.701667000  |
| O | -0.344219000 | 0.573974000  | 2.434355000  |
| O | -0.562433000 | -1.880548000 | -1.466409000 |

|   |              |              |              |
|---|--------------|--------------|--------------|
| C | 1.280735000  | -0.571188000 | 0.319692000  |
| C | 2.110072000  | -1.679994000 | 0.519019000  |
| C | 1.765392000  | 0.675076000  | -0.114337000 |
| C | 3.481117000  | -1.515529000 | 0.293820000  |
| C | 3.142526000  | 0.798090000  | -0.323876000 |
| C | 3.994301000  | -0.287391000 | -0.119390000 |
| H | 4.147689000  | -2.361124000 | 0.442690000  |
| H | 3.548775000  | 1.750506000  | -0.655450000 |
| H | 5.061871000  | -0.176109000 | -0.289410000 |
| C | 0.839477000  | 1.859537000  | -0.342080000 |
| H | 1.465102000  | 2.709046000  | -0.633420000 |
| H | 0.384384000  | 2.149212000  | 0.610921000  |
| C | -0.258193000 | 1.688186000  | -1.440708000 |
| H | -0.226318000 | 2.582141000  | -2.084725000 |
| H | 0.014871000  | 0.860400000  | -2.113437000 |
| C | -1.710443000 | 1.521534000  | -1.062640000 |
| H | -2.392353000 | 1.696243000  | -1.892667000 |
| C | -2.321821000 | 1.698364000  | 0.345436000  |
| H | -1.826808000 | 2.449156000  | 0.975998000  |
| H | -3.368853000 | 2.002388000  | 0.240280000  |
| C | -3.514657000 | -1.161075000 | -0.986003000 |
| H | -3.958323000 | -1.948196000 | -0.355551000 |
| H | -3.263554000 | -1.610638000 | -1.951176000 |
| H | -4.284365000 | -0.395288000 | -1.133871000 |
| C | 1.524333000  | -3.002843000 | 0.942804000  |
| H | 2.309801000  | -3.742066000 | 1.125877000  |
| H | 0.858068000  | -3.386631000 | 0.162174000  |
| H | 0.930908000  | -2.896869000 | 1.858368000  |

**C2-C3 distance: 2.2**

|   |              |              |              |
|---|--------------|--------------|--------------|
| C | -0.829271000 | 0.049918000  | 1.453497000  |
| C | -2.244583000 | 0.265124000  | 0.926465000  |
| C | -2.272669000 | -0.565581000 | -0.371675000 |
| C | -0.960941000 | -1.176569000 | -0.551641000 |
| N | -0.131612000 | -0.701786000 | 0.506426000  |
| H | -2.988476000 | 0.026993000  | 1.695154000  |
| O | -0.345940000 | 0.550742000  | 2.449302000  |
| O | -0.559008000 | -1.883405000 | -1.461559000 |
| C | 1.282009000  | -0.580197000 | 0.326793000  |
| C | 2.116378000  | -1.683458000 | 0.533074000  |
| C | 1.757649000  | 0.663733000  | -0.123154000 |
| C | 3.485503000  | -1.515495000 | 0.299134000  |
| C | 3.133224000  | 0.789993000  | -0.341799000 |
| C | 3.990772000  | -0.289608000 | -0.130388000 |
| H | 4.156657000  | -2.356504000 | 0.453161000  |
| H | 3.533731000  | 1.740572000  | -0.685414000 |

|   |              |              |              |
|---|--------------|--------------|--------------|
| H | 5.056872000  | -0.175521000 | -0.307636000 |
| C | 0.827348000  | 1.845083000  | -0.351564000 |
| H | 1.451874000  | 2.693210000  | -0.649377000 |
| H | 0.379752000  | 2.138911000  | 0.603871000  |
| C | -0.279841000 | 1.678848000  | -1.442170000 |
| H | -0.273765000 | 2.594493000  | -2.054917000 |
| H | 0.002667000  | 0.877361000  | -2.140252000 |
| C | -1.729517000 | 1.474551000  | -1.051840000 |
| H | -2.415518000 | 1.655889000  | -1.877898000 |
| C | -2.320691000 | 1.699290000  | 0.359378000  |
| H | -1.806775000 | 2.449086000  | 0.974182000  |
| H | -3.366045000 | 2.012770000  | 0.267674000  |
| C | -3.498574000 | -1.118979000 | -1.016157000 |
| H | -3.933551000 | -1.920237000 | -0.398877000 |
| H | -3.247771000 | -1.548314000 | -1.990574000 |
| H | -4.271936000 | -0.354243000 | -1.148118000 |
| C | 1.537252000  | -3.004407000 | 0.971695000  |
| H | 2.325877000  | -3.740823000 | 1.152447000  |
| H | 0.864722000  | -3.395433000 | 0.200008000  |
| H | 0.952267000  | -2.893250000 | 1.892025000  |

**C2-C3 distance: 2.1**

|   |              |              |              |
|---|--------------|--------------|--------------|
| C | -0.830533000 | 0.038689000  | 1.462236000  |
| C | -2.243116000 | 0.263006000  | 0.931612000  |
| C | -2.255527000 | -0.522060000 | -0.395256000 |
| C | -0.951886000 | -1.170111000 | -0.553660000 |
| N | -0.130363000 | -0.712880000 | 0.513617000  |
| H | -2.993505000 | 0.004157000  | 1.686623000  |
| O | -0.348251000 | 0.526798000  | 2.464020000  |
| O | -0.555668000 | -1.882538000 | -1.459495000 |
| C | 1.283434000  | -0.588487000 | 0.333144000  |
| C | 2.122137000  | -1.686669000 | 0.546212000  |
| C | 1.750695000  | 0.653012000  | -0.131570000 |
| C | 3.489559000  | -1.515525000 | 0.304764000  |
| C | 3.124820000  | 0.782182000  | -0.358147000 |
| C | 3.987565000  | -0.291926000 | -0.139746000 |
| H | 4.164894000  | -2.352228000 | 0.463785000  |
| H | 3.520161000  | 1.730801000  | -0.712934000 |
| H | 5.052332000  | -0.175360000 | -0.323257000 |
| C | 0.815556000  | 1.830819000  | -0.361025000 |
| H | 1.438132000  | 2.677887000  | -0.666009000 |
| H | 0.375360000  | 2.128850000  | 0.596712000  |
| C | -0.301449000 | 1.667743000  | -1.443009000 |
| H | -0.317706000 | 2.599832000  | -2.028928000 |
| H | -0.011976000 | 0.888469000  | -2.161566000 |
| C | -1.748956000 | 1.430569000  | -1.040848000 |



|   |              |              |              |
|---|--------------|--------------|--------------|
| H | -2.437381000 | 1.624405000  | -1.863031000 |
| C | -2.320152000 | 1.701171000  | 0.372416000  |
| H | -1.788394000 | 2.449798000  | 0.971777000  |
| H | -3.363756000 | 2.023356000  | 0.293918000  |
| C | -3.481435000 | -1.079637000 | -1.043164000 |
| H | -3.902352000 | -1.896603000 | -0.438283000 |
| H | -3.232243000 | -1.487356000 | -2.027254000 |
| H | -4.262139000 | -0.319703000 | -1.156971000 |
| C | 1.548659000  | -3.005579000 | 0.998210000  |
| H | 2.339832000  | -3.739723000 | 1.177023000  |
| H | 0.870489000  | -3.402987000 | 0.234686000  |
| H | 0.971235000  | -2.889419000 | 1.922674000  |

**C2-C3 distance: 2.0**

|   |              |              |              |
|---|--------------|--------------|--------------|
| C | -0.831810000 | 0.026505000  | 1.469996000  |
| C | -2.241229000 | 0.260347000  | 0.936081000  |
| C | -2.237710000 | -0.476312000 | -0.419082000 |
| C | -0.942716000 | -1.159296000 | -0.559430000 |
| N | -0.129145000 | -0.722193000 | 0.517815000  |
| H | -2.998316000 | -0.019190000 | 1.676242000  |
| O | -0.350756000 | 0.499311000  | 2.478900000  |
| O | -0.552147000 | -1.874802000 | -1.463287000 |
| C | 1.284991000  | -0.596042000 | 0.337910000  |
| C | 2.127261000  | -1.689407000 | 0.558959000  |
| C | 1.744694000  | 0.642698000  | -0.140887000 |
| C | 3.493229000  | -1.515659000 | 0.311415000  |
| C | 3.117575000  | 0.774211000  | -0.374123000 |
| C | 3.984765000  | -0.294755000 | -0.147802000 |
| H | 4.172349000  | -2.348121000 | 0.476381000  |
| H | 3.508501000  | 1.720557000  | -0.739662000 |
| H | 5.048408000  | -0.176341000 | -0.336530000 |
| C | 0.804574000  | 1.816902000  | -0.371446000 |
| H | 1.424764000  | 2.662776000  | -0.684709000 |
| H | 0.372583000  | 2.119554000  | 0.588786000  |
| C | -0.323389000 | 1.655816000  | -1.443376000 |
| H | -0.359451000 | 2.600412000  | -2.006308000 |
| H | -0.029630000 | 0.895233000  | -2.179054000 |
| C | -1.768673000 | 1.389416000  | -1.028685000 |
| H | -2.458337000 | 1.599404000  | -1.846932000 |
| C | -2.319811000 | 1.702884000  | 0.385572000  |
| H | -1.771173000 | 2.449870000  | 0.970180000  |
| H | -3.361631000 | 2.033009000  | 0.320310000  |
| C | -3.463414000 | -1.042686000 | -1.067593000 |
| H | -3.864076000 | -1.878272000 | -0.476104000 |
| H | -3.217576000 | -1.425319000 | -2.062596000 |
| H | -4.255669000 | -0.291903000 | -1.159127000 |

|   |             |              |             |
|---|-------------|--------------|-------------|
| C | 1.558072000 | -3.005497000 | 1.024321000 |
| H | 2.350956000 | -3.737789000 | 1.203103000 |
| H | 0.875272000 | -3.409424000 | 0.268285000 |
| H | 0.986736000 | -2.883136000 | 1.951753000 |

**C2-C3 distance: 1.9**

|   |              |              |              |
|---|--------------|--------------|--------------|
| C | -0.833264000 | 0.012607000  | 1.476903000  |
| C | -2.239137000 | 0.256979000  | 0.939615000  |
| C | -2.220133000 | -0.429214000 | -0.442854000 |
| C | -0.934190000 | -1.145751000 | -0.568308000 |
| N | -0.128187000 | -0.730894000 | 0.519482000  |
| H | -3.003138000 | -0.042526000 | 1.664028000  |
| O | -0.353949000 | 0.467547000  | 2.494066000  |
| O | -0.549335000 | -1.862580000 | -1.471722000 |
| C | 1.286428000  | -0.603317000 | 0.341218000  |
| C | 2.132129000  | -1.691628000 | 0.571526000  |
| C | 1.739177000  | 0.632576000  | -0.150745000 |
| C | 3.496835000  | -1.515430000 | 0.318977000  |
| C | 3.110958000  | 0.766328000  | -0.389598000 |
| C | 3.982318000  | -0.297517000 | -0.154819000 |
| H | 4.179593000  | -2.343522000 | 0.490761000  |
| H | 3.497805000  | 1.710269000  | -0.765523000 |
| H | 5.044981000  | -0.177429000 | -0.348011000 |
| C | 0.794192000  | 1.803169000  | -0.382854000 |
| H | 1.411704000  | 2.647573000  | -0.705427000 |
| H | 0.370864000  | 2.111198000  | 0.579769000  |
| C | -0.345246000 | 1.642554000  | -1.443653000 |
| H | -0.399340000 | 2.596498000  | -1.987210000 |
| H | -0.049144000 | 0.897578000  | -2.193554000 |
| C | -1.788046000 | 1.349663000  | -1.015426000 |
| H | -2.477632000 | 1.578454000  | -1.829850000 |
| C | -2.318917000 | 1.704372000  | 0.398757000  |
| H | -1.754050000 | 2.449025000  | 0.969374000  |
| H | -3.358806000 | 2.042023000  | 0.346400000  |
| C | -3.445897000 | -1.006448000 | -1.090219000 |
| H | -3.819957000 | -1.865132000 | -0.516328000 |
| H | -3.207007000 | -1.356531000 | -2.098888000 |
| H | -4.252895000 | -0.268424000 | -1.151482000 |
| C | 1.566943000  | -3.004374000 | 1.050891000  |
| H | 2.361405000  | -3.734534000 | 1.231389000  |
| H | 0.880371000  | -3.415696000 | 0.302205000  |
| H | 1.000638000  | -2.874710000 | 1.980387000  |

**C2-C3 distance: 1.8**

|   |              |              |             |
|---|--------------|--------------|-------------|
| C | -0.834515000 | -0.002322000 | 1.482969000 |
| C | -2.236863000 | 0.252918000  | 0.942730000 |

|   |              |              |              |
|---|--------------|--------------|--------------|
| C | -2.203152000 | -0.381082000 | -0.465795000 |
| C | -0.926532000 | -1.130731000 | -0.579086000 |
| N | -0.127437000 | -0.738896000 | 0.519220000  |
| H | -3.007613000 | -0.065448000 | 1.651064000  |
| O | -0.357195000 | 0.433261000  | 2.508884000  |
| O | -0.547932000 | -1.848801000 | -1.482468000 |
| C | 1.287723000  | -0.610542000 | 0.343057000  |
| C | 2.136677000  | -1.693678000 | 0.583057000  |
| C | 1.734124000  | 0.622690000  | -0.160921000 |
| C | 3.500323000  | -1.514989000 | 0.326453000  |
| C | 3.104867000  | 0.758677000  | -0.404493000 |
| C | 3.980133000  | -0.300180000 | -0.161218000 |
| H | 4.186611000  | -2.338629000 | 0.505407000  |
| H | 3.487973000  | 1.700328000  | -0.789866000 |
| H | 5.041930000  | -0.178477000 | -0.358120000 |
| C | 0.784321000  | 1.789711000  | -0.394012000 |
| H | 1.398682000  | 2.632914000  | -0.725813000 |
| H | 0.369437000  | 2.102571000  | 0.570972000  |
| C | -0.366529000 | 1.629125000  | -1.443351000 |
| H | -0.437808000 | 2.591074000  | -1.968659000 |
| H | -0.068532000 | 0.899158000  | -2.206772000 |
| C | -1.806693000 | 1.310211000  | -1.002152000 |
| H | -2.494536000 | 1.559136000  | -1.813542000 |
| C | -2.317995000 | 1.705359000  | 0.410922000  |
| H | -1.737661000 | 2.447615000  | 0.967734000  |
| H | -3.355881000 | 2.049951000  | 0.370601000  |
| C | -3.429118000 | -0.970994000 | -1.110619000 |
| H | -3.775237000 | -1.851875000 | -0.554802000 |
| H | -3.198807000 | -1.288128000 | -2.132238000 |
| H | -4.250799000 | -0.247353000 | -1.140864000 |
| C | 1.575459000  | -3.002636000 | 1.076948000  |
| H | 2.371524000  | -3.730165000 | 1.260934000  |
| H | 0.886061000  | -3.422379000 | 0.335492000  |
| H | 1.013064000  | -2.864638000 | 2.007621000  |

**C2-C3 distance: 1.7**

|   |              |              |              |
|---|--------------|--------------|--------------|
| C | -0.835179000 | -0.015514000 | 1.488645000  |
| C | -2.233843000 | 0.250566000  | 0.945856000  |
| C | -2.186683000 | -0.332233000 | -0.486269000 |
| C | -0.920016000 | -1.114509000 | -0.589436000 |
| N | -0.126858000 | -0.745843000 | 0.518904000  |
| H | -3.011176000 | -0.084666000 | 1.638343000  |
| O | -0.359898000 | 0.400915000  | 2.522905000  |
| O | -0.548491000 | -1.834967000 | -1.492386000 |
| C | 1.288844000  | -0.617108000 | 0.344612000  |
| C | 2.140734000  | -1.695675000 | 0.592829000  |

|   |              |              |              |
|---|--------------|--------------|--------------|
| C | 1.729669000  | 0.613881000  | -0.169285000 |
| C | 3.503538000  | -1.514264000 | 0.333664000  |
| C | 3.099638000  | 0.752460000  | -0.415814000 |
| C | 3.978428000  | -0.301771000 | -0.164858000 |
| H | 4.193017000  | -2.333882000 | 0.518715000  |
| H | 3.479393000  | 1.692348000  | -0.808732000 |
| H | 5.039598000  | -0.178220000 | -0.363963000 |
| C | 0.774983000  | 1.776992000  | -0.404425000 |
| H | 1.385800000  | 2.618858000  | -0.746220000 |
| H | 0.368029000  | 2.095591000  | 0.562298000  |
| C | -0.386601000 | 1.614012000  | -1.442430000 |
| H | -0.474437000 | 2.582007000  | -1.952138000 |
| H | -0.086742000 | 0.897436000  | -2.217525000 |
| C | -1.824382000 | 1.270155000  | -0.989071000 |
| H | -2.508191000 | 1.538470000  | -1.799233000 |
| C | -2.317376000 | 1.707195000  | 0.420582000  |
| H | -1.723342000 | 2.448591000  | 0.962768000  |
| H | -3.353645000 | 2.056827000  | 0.390550000  |
| C | -3.412809000 | -0.937646000 | -1.126718000 |
| H | -3.732143000 | -1.836731000 | -0.585916000 |
| H | -3.191151000 | -1.226769000 | -2.158699000 |
| H | -4.248237000 | -0.229119000 | -1.130501000 |
| C | 1.582799000  | -3.001829000 | 1.097548000  |
| H | 2.380202000  | -3.727153000 | 1.284400000  |
| H | 0.891595000  | -3.428096000 | 0.361453000  |
| H | 1.023005000  | -2.857549000 | 2.028822000  |

**C2-C3 distance: 1.6**

|   |              |              |              |
|---|--------------|--------------|--------------|
| C | -0.835773000 | -0.028574000 | 1.493640000  |
| C | -2.230745000 | 0.248472000  | 0.948576000  |
| C | -2.170691000 | -0.282078000 | -0.505621000 |
| C | -0.914268000 | -1.096289000 | -0.600997000 |
| N | -0.126705000 | -0.752446000 | 0.517788000  |
| H | -3.014484000 | -0.102818000 | 1.625051000  |
| O | -0.362722000 | 0.368472000  | 2.536097000  |
| O | -0.550248000 | -1.818642000 | -1.504194000 |
| C | 1.289581000  | -0.623577000 | 0.345459000  |
| C | 2.144174000  | -1.697754000 | 0.601661000  |
| C | 1.725533000  | 0.605293000  | -0.177345000 |
| C | 3.506265000  | -1.513834000 | 0.340376000  |
| C | 3.094759000  | 0.746168000  | -0.426643000 |
| C | 3.976744000  | -0.303736000 | -0.168408000 |
| H | 4.198669000  | -2.329607000 | 0.531437000  |
| H | 3.471493000  | 1.684369000  | -0.826448000 |
| H | 5.037362000  | -0.178578000 | -0.369465000 |
| C | 0.766553000  | 1.765027000  | -0.414198000 |

|   |              |              |              |
|---|--------------|--------------|--------------|
| H | 1.373856000  | 2.605264000  | -0.766292000 |
| H | 0.367649000  | 2.089675000  | 0.554113000  |
| C | -0.405618000 | 1.599356000  | -1.440511000 |
| H | -0.509807000 | 2.572503000  | -1.935465000 |
| H | -0.104677000 | 0.895617000  | -2.226728000 |
| C | -1.840989000 | 1.230798000  | -0.975316000 |
| H | -2.519072000 | 1.517895000  | -1.785536000 |
| C | -2.317506000 | 1.709051000  | 0.429115000  |
| H | -1.711706000 | 2.450311000  | 0.957280000  |
| H | -3.352544000 | 2.062029000  | 0.407501000  |
| C | -3.396441000 | -0.905747000 | -1.140733000 |
| H | -3.687214000 | -1.822283000 | -0.614830000 |
| H | -3.184176000 | -1.167396000 | -2.182193000 |
| H | -4.246375000 | -0.214763000 | -1.118272000 |
| C | 1.589632000  | -3.001021000 | 1.117322000  |
| H | 2.388611000  | -3.723507000 | 1.308420000  |
| H | 0.897679000  | -3.434728000 | 0.386236000  |
| H | 1.031271000  | -2.850168000 | 2.048396000  |
